# Supplementary material for: The Comprehensive Analysis of Competitive Endogenous RNA Networks and Tumor-Infiltrating Immune Cells in Gastric Cancer With Lymph Node Metastasis
Source: Research Square preprint supplement (doi:10.21203/rs.3.rs-1133390/v1), 2021-12-08
Supplement: Supplementary file 1 [file 1ff7b0dd42e6195d11ff777a.docx]

| lncRNA | miRNA |
| --- | --- |
| LINC01559 | hsa-miR-30b-3p |
| AC009501.4 | hsa-miR-335-3p |
| RP11-111A22.1 | hsa-miR-589-5p |
