# Supplementary material for: The Comprehensive Analysis of Competitive Endogenous RNA Networks and Tumor-Infiltrating Immune Cells in Gastric Cancer With Lymph Node Metastasis
Source: Research Square preprint supplement (doi:10.21203/rs.3.rs-1133390/v1), 2021-12-08
Supplement: Supplementary file 2 [file 4e0718cfc902834df05e533a.docx]

| miRNA | mRNA |
| --- | --- |
| hsa-let-7a-5p | LIN28B |
| hsa-let-7a-5p | TRIM71 |
| hsa-let-7a-5p | HAND1 |
| hsa-let-7a-5p | TRIM71 |
| hsa-let-7a-5p | TRIM71 |
| hsa-let-7a-5p | TRIM71 |
| hsa-let-7b-5p | LIN28B |
| hsa-let-7b-5p | LIN28B |
| hsa-let-7b-5p | TRIM71 |
| hsa-let-7c-5p | TRIM71 |
| hsa-let-7c-5p | TRIM71 |
| hsa-let-7c-5p | HAND1 |
| hsa-let-7c-5p | TRIM71 |
| hsa-let-7d-5p | TRIM71 |
| hsa-let-7e-5p | TRIM71 |
| hsa-let-7e-5p | HAND1 |
| hsa-let-7f-2-3p | GRIK3 |
| hsa-let-7f-2-3p | GRIK3 |
| hsa-let-7f-5p | HAND1 |
| hsa-let-7f-5p | TRIM71 |
| hsa-let-7g-5p | TRIM71 |
| hsa-let-7g-5p | HAND1 |
| hsa-let-7i-5p | TRIM71 |
| hsa-let-7i-5p | HAND1 |
| hsa-miR-1-3p | PAX3 |
| hsa-miR-1-3p | HCN4 |
| hsa-miR-1-3p | KCNJ2 |
| hsa-miR-1-3p | TNS4 |
| hsa-miR-1-3p | KCNJ2 |
| hsa-miR-1-3p | PAX3 |
| hsa-miR-1-3p | KCNJ2 |
| hsa-miR-1-3p | HCN4 |
| hsa-miR-1-3p | KCNJ2 |
| hsa-miR-1-3p | KCNJ2 |
| hsa-miR-1-3p | PAX3 |
| hsa-miR-103a-3p | MYBPC1 |
| hsa-miR-103a-3p | MYBPC1 |
| hsa-miR-106a-5p | HOXD11 |
| hsa-miR-106a-5p | APOH |
| hsa-miR-106b-5p | CAMK2N2 |
| hsa-miR-106b-5p | APOH |
| hsa-miR-106b-5p | HOXD11 |
| hsa-miR-107 | MYBPC1 |
| hsa-miR-107 | CHGA |
| hsa-miR-107 | MYBPC1 |
| hsa-miR-1226-3p | GRIK3 |
| hsa-miR-125a-5p | TMEM63C |
| hsa-miR-125b-5p | TRIM71 |
| hsa-miR-125b-5p | TMEM63C |
| hsa-miR-125b-5p | LIN28B |
| hsa-miR-126-5p | GABRA4 |
| hsa-miR-1301-3p | CTRC |
| hsa-miR-1301-3p | CTRC |
| hsa-miR-130a-3p | HOXD11 |
| hsa-miR-130a-3p | TRIM71 |
| hsa-miR-130b-3p | HOXD11 |
| hsa-miR-130b-3p | TRIM71 |
| hsa-miR-130b-5p | PLP1 |
| hsa-miR-130b-5p | MUC17 |
| hsa-miR-135a-5p | ARC |
| hsa-miR-135b-5p | ARC |
| hsa-miR-136-5p | UNC13A |
| hsa-miR-141-5p | FOXL2 |
| hsa-miR-143-3p | CASP5 |
| hsa-miR-143-3p | TRIM71 |
| hsa-miR-144-3p | GRIK3 |
| hsa-miR-144-3p | GRIK3 |
| hsa-miR-144-3p | FGG |
| hsa-miR-145-3p | NTRK2 |
| hsa-miR-145-5p | PNMA3 |
| hsa-miR-150-5p | TNS4 |
| hsa-miR-150-5p | APOH |
| hsa-miR-153-5p | SEMA3E |
| hsa-miR-153-5p | SEMA3E |
| hsa-miR-17-3p | SEMA3E |
| hsa-miR-17-3p | SEMA3E |
| hsa-miR-17-5p | CAMK2N2 |
| hsa-miR-17-5p | HOXD11 |
| hsa-miR-17-5p | APOH |
| hsa-miR-181b-3p | ASB4 |
| hsa-miR-181b-3p | RIMKLB |
| hsa-miR-182-5p | TRIM71 |
| hsa-miR-183-5p | TRIM71 |
| hsa-miR-185-3p | TMEM63C |
| hsa-miR-185-5p | TG |
| hsa-miR-188-3p | PNMA3 |
| hsa-miR-193b-5p | FTCD |
| hsa-miR-196a-5p | KCNJ2 |
| hsa-miR-196b-5p | KCNJ2 |
| hsa-miR-197-3p | PIPOX |
| hsa-miR-197-3p | ZNF208 |
| hsa-miR-197-3p | COL22A1 |
| hsa-miR-1976 | FTCD |
| hsa-miR-1976 | ZNF716 |
| hsa-miR-199a-5p | PSAPL1 |
| hsa-miR-199b-5p | PSAPL1 |
| hsa-miR-19b-3p | KCNJ2 |
| hsa-miR-19b-3p | ARC |
| hsa-miR-200b-5p | WNT16 |
| hsa-miR-20a-3p | CA6 |
| hsa-miR-20a-5p | HOXD11 |
| hsa-miR-20a-5p | CAMK2N2 |
| hsa-miR-20a-5p | APOH |
| hsa-miR-20b-5p | HOXD11 |
| hsa-miR-20b-5p | CAMK2N2 |
| hsa-miR-20b-5p | APOH |
| hsa-miR-21-3p | L1CAM |
| hsa-miR-2110 | HAND1 |
| hsa-miR-2110 | TRIM71 |
| hsa-miR-2116-3p | GRIN2B |
| hsa-miR-214-5p | ZNF716 |
| hsa-miR-214-5p | PSAPL1 |
| hsa-miR-216a-5p | PSAPL1 |
| hsa-miR-216a-5p | PAX3 |
| hsa-miR-218-5p | RIMKLB |
| hsa-miR-218-5p | CARD11 |
| hsa-miR-22-5p | PNMA3 |
| hsa-miR-222-5p | SEMA3E |
| hsa-miR-222-5p | SEMA3E |
| hsa-miR-223-3p | NMNAT2 |
| hsa-miR-223-3p | NMNAT2 |
| hsa-miR-223-5p | GRIN2B |
| hsa-miR-223-5p | NELL2 |
| hsa-miR-223-5p | PLP1 |
| hsa-miR-223-5p | NELL2 |
| hsa-miR-223-5p | GRIN2B |
| hsa-miR-2355-3p | CHD5 |
| hsa-miR-23a-3p | ZNF208 |
| hsa-miR-23a-3p | ZNF208 |
| hsa-miR-23a-3p | ZNF208 |
| hsa-miR-23a-5p | CAMK2N2 |
| hsa-miR-23b-3p | ZNF208 |
| hsa-miR-23b-3p | ZNF208 |
| hsa-miR-23b-3p | ZNF208 |
| hsa-miR-23b-5p | CAMK2N2 |
| hsa-miR-24-1-5p | DPCR1 |
| hsa-miR-24-2-5p | DPCR1 |
| hsa-miR-27a-3p | HOXD11 |
| hsa-miR-27a-3p | PAX3 |
| hsa-miR-27b-3p | EYA4 |
| hsa-miR-27b-3p | HOXD11 |
| hsa-miR-27b-3p | PAX3 |
| hsa-miR-29a-3p | FGG |
| hsa-miR-29a-5p | TMPRSS15 |
| hsa-miR-29b-2-5p | ZNF208 |
| hsa-miR-29b-3p | FGG |
| hsa-miR-29c-3p | FGG |
| hsa-miR-301a-3p | HOXD11 |
| hsa-miR-301a-3p | TRIM71 |
| hsa-miR-301b-3p | HOXD11 |
| hsa-miR-301b-3p | TRIM71 |
| hsa-miR-3065-5p | GABRA4 |
| hsa-miR-3065-5p | GABRA4 |
| hsa-miR-30a-3p | KIAA1324L |
| hsa-miR-30a-5p | FOXL2 |
| hsa-miR-30a-5p | LIN28B |
| hsa-miR-30b-3p | SLC5A5 |
| hsa-miR-30b-3p | TMEM63C |
| hsa-miR-30b-3p | TNS4 |
| hsa-miR-30b-5p | LIN28B |
| hsa-miR-30c-1-3p | TNS4 |
| hsa-miR-30c-2-3p | TNS4 |
| hsa-miR-30c-5p | LIN28B |
| hsa-miR-30d-3p | KIAA1324L |
| hsa-miR-30d-5p | LIN28B |
| hsa-miR-30e-3p | KIAA1324L |
| hsa-miR-30e-5p | LIN28B |
| hsa-miR-3150b-3p | TRIM71 |
| hsa-miR-3170 | FTCD |
| hsa-miR-3170 | TRIM71 |
| hsa-miR-32-3p | HOXD11 |
| hsa-miR-32-5p | SPOCK2 |
| hsa-miR-329-3p | GRIK3 |
| hsa-miR-329-3p | GREB1L |
| hsa-miR-329-3p | PAX3 |
| hsa-miR-329-3p | PAX3 |
| hsa-miR-331-3p | UNC13A |
| hsa-miR-331-3p | NELL2 |
| hsa-miR-331-3p | UNC13A |
| hsa-miR-331-3p | UNC13A |
| hsa-miR-331-3p | UNC13A |
| hsa-miR-335-3p | PKHD1 |
| hsa-miR-335-3p | PKHD1 |
| hsa-miR-342-5p | NMNAT2 |
| hsa-miR-342-5p | MUC17 |
| hsa-miR-342-5p | MUC17 |
| hsa-miR-342-5p | MUC17 |
| hsa-miR-34a-5p | AGTR1 |
| hsa-miR-34a-5p | CD70 |
| hsa-miR-361-3p | PNMA5 |
| hsa-miR-3614-3p | GRIN2B |
| hsa-miR-3614-5p | TRIM71 |
| hsa-miR-3614-5p | CA6 |
| hsa-miR-3614-5p | SLC5A5 |
| hsa-miR-362-3p | GREB1L |
| hsa-miR-362-3p | PAX3 |
| hsa-miR-362-3p | GRIK3 |
| hsa-miR-362-3p | PAX3 |
| hsa-miR-369-3p | LIN28B |
| hsa-miR-369-3p | MYBPC1 |
| hsa-miR-374a-5p | L1CAM |
| hsa-miR-374a-5p | LIN28B |
| hsa-miR-374a-5p | MYBPC1 |
| hsa-miR-374b-5p | L1CAM |
| hsa-miR-374b-5p | LIN28B |
| hsa-miR-374b-5p | WNT16 |
| hsa-miR-374b-5p | MYBPC1 |
| hsa-miR-377-5p | TRIM71 |
| hsa-miR-377-5p | HAVCR1 |
| hsa-miR-377-5p | SLC5A5 |
| hsa-miR-377-5p | ZNF716 |
| hsa-miR-377-5p | HAVCR1 |
| hsa-miR-377-5p | HAVCR1 |
| hsa-miR-379-5p | LIN28B |
| hsa-miR-3928-3p | FOXL2 |
| hsa-miR-3934-5p | APOH |
| hsa-miR-409-3p | UGT2B17 |
| hsa-miR-409-3p | FGG |
| hsa-miR-409-3p | UNC13A |
| hsa-miR-432-5p | UNC13A |
| hsa-miR-4326 | HOXD11 |
| hsa-miR-452-3p | TRIM71 |
| hsa-miR-454-3p | HOXD11 |
| hsa-miR-454-3p | TRIM71 |
| hsa-miR-455-3p | CA6 |
| hsa-miR-455-3p | SLC5A5 |
| hsa-miR-455-3p | TNS4 |
| hsa-miR-455-3p | HAVCR1 |
| hsa-miR-455-3p | JPH3 |
| hsa-miR-455-3p | HAVCR1 |
| hsa-miR-455-3p | ZNF716 |
| hsa-miR-455-5p | ARC |
| hsa-miR-4660 | PLEKHG4B |
| hsa-miR-4668-3p | KCNJ13 |
| hsa-miR-4668-3p | ARC |
| hsa-miR-4677-3p | TRIM71 |
| hsa-miR-4742-3p | PLEKHG4B |
| hsa-miR-483-3p | GRIN2B |
| hsa-miR-483-3p | FTCD |
| hsa-miR-486-3p | WNT16 |
| hsa-miR-486-3p | PAX2 |
| hsa-miR-491-5p | WNT16 |
| hsa-miR-493-5p | GRIK3 |
| hsa-miR-493-5p | PCSK1 |
| hsa-miR-493-5p | L1CAM |
| hsa-miR-493-5p | L1CAM |
| hsa-miR-5000-3p | ENPP6 |
| hsa-miR-5000-3p | ENPP6 |
| hsa-miR-5010-3p | PLP1 |
| hsa-miR-505-5p | CTRC |
| hsa-miR-505-5p | CTRC |
| hsa-miR-505-5p | UNC13A |
| hsa-miR-532-3p | PNMA3 |
| hsa-miR-532-3p | GRIN2B |
| hsa-miR-539-5p | CARD11 |
| hsa-miR-542-3p | CA6 |
| hsa-miR-552-5p | PKHD1 |
| hsa-miR-582-3p | ZNF716 |
| hsa-miR-584-5p | ZNF208 |
| hsa-miR-592 | NMNAT2 |
| hsa-miR-592 | NMNAT2 |
| hsa-miR-616-3p | TFPI2 |
| hsa-miR-628-5p | TTYH1 |
| hsa-miR-629-3p | MUC17 |
| hsa-miR-642a-5p | JPH3 |
| hsa-miR-642a-5p | SEMA3E |
| hsa-miR-642a-5p | SEMA3E |
| hsa-miR-642a-5p | PLEKHG4B |
| hsa-miR-660-3p | ZNF716 |
| hsa-miR-664a-3p | SEMA3E |
| hsa-miR-664a-3p | SEMA3E |
| hsa-miR-7-1-3p | KCNJ2 |
| hsa-miR-7-5p | ENPP6 |
| hsa-miR-744-5p | PAX2 |
| hsa-miR-744-5p | UNC13A |
| hsa-miR-758-3p | TG |
| hsa-miR-758-3p | TG |
| hsa-miR-766-3p | ZNF716 |
| hsa-miR-766-3p | SALL4 |
| hsa-miR-769-5p | FGG |
| hsa-miR-769-5p | PLEKHG4B |
| hsa-miR-769-5p | NELL2 |
| hsa-miR-9-5p | KCNJ2 |
| hsa-miR-9-5p | TTYH1 |
| hsa-miR-92a-1-5p | HAND1 |
| hsa-miR-92a-3p | SPOCK2 |
| hsa-miR-92b-3p | SPOCK2 |
| hsa-miR-93-5p | CAMK2N2 |
| hsa-miR-93-5p | APOH |
| hsa-miR-93-5p | HOXD11 |
| hsa-miR-935 | WNT16 |
| hsa-miR-939-5p | UNC13A |
| hsa-miR-939-5p | UNC13A |
| hsa-miR-939-5p | UNC13A |
| hsa-miR-939-5p | UNC13A |
| hsa-miR-939-5p | UNC13A |
| hsa-miR-940 | HAVCR1 |
| hsa-miR-940 | HAVCR1 |
| hsa-miR-940 | HAVCR1 |
| hsa-miR-940 | HAVCR1 |
| hsa-miR-940 | POU4F1 |
| hsa-miR-942-5p | ZNF208 |
| hsa-miR-98-5p | HAND1 |
| hsa-miR-98-5p | SALL4 |
| hsa-miR-98-5p | TRIM71 |
