# Supplementary material for: The Comprehensive Analysis of Competitive Endogenous RNA Networks and Tumor-Infiltrating Immune Cells in Gastric Cancer With Lymph Node Metastasis
Source: Research Square preprint supplement (doi:10.21203/rs.3.rs-1133390/v1), 2021-12-08
Supplement: Supplementary file 3 [file 5afe297652b59860e2b520d2.docx]

| id | B cells naive | B cells memory | Plasma cells | T cells CD8 | T cells CD4 naive | T cells CD4 memory resting | T cells CD4 memory activated | T cells follicular helper | T cells regulatory (Tregs) | T cells gamma delta | NK cells resting | NK cells activated | Monocytes | Macrophages M0 | Macrophages M1 | Macrophages M2 | Dendritic cells resting | Dendritic cells activated | Mast cells resting | Mast cells activated | Eosinophils | Neutrophils |
| --- | --- | --- | --- | --- | --- | --- | --- | --- | --- | --- | --- | --- | --- | --- | --- | --- | --- | --- | --- | --- | --- | --- |
| TCGA-D7-8570 | 0.061005301 | 0 | 0.263303248 | 0.385982714 | 0 | 0.300975606 | 0.339387766 | 0.174247386 | 0.331635246 | 0 | 0 | 0.183984453 | 0 | 0.754860918 | 0.249420601 | 0.537245593 | 0.159142149 | 0 | 0.113507531 | 0 | 0 | 0.009939602 |
| TCGA-D7-6815 | 0.139257612 | 0 | 0.096933173 | 0.038911889 | 0 | 0.393513245 | 0.030196401 | 0 | 0.145965935 | 0 | 0.086817389 | 0 | 0 | 0.625732801 | 0.12550634 | 0.184931215 | 0.039582333 | 0 | 0.047242546 | 0.005805697 | 0 | 0 |
| TCGA-VQ-A8E3 | 0.144111067 | 0 | 0.132252624 | 0.55341253 | 0 | 0 | 0.372677364 | 0.143774425 | 0.161949408 | 0.010984371 | 0.286788102 | 0 | 0 | 0.149164534 | 0.210120308 | 0.235913615 | 0.068132048 | 0.117290179 | 0.078902931 | 0 | 0 | 0.026743073 |
| TCGA-CD-8524 | 0.139180206 | 0 | 0.180440028 | 0.377259072 | 0 | 0.316953485 | 0.031837581 | 0.036391771 | 0.16351392 | 0 | 0 | 0.039443363 | 0.028450591 | 0.141769473 | 0.232347741 | 0.193937036 | 0.087820983 | 0 | 0.100521489 | 0 | 0 | 0.005299621 |
| TCGA-VQ-AA6G | 0.108637086 | 0 | 0.126261236 | 0.02782079 | 0 | 0.550100041 | 0.004992675 | 0.011518757 | 0.102218973 | 0 | 0.104390355 | 0 | 0.002923055 | 0.324164501 | 0.034714201 | 0.125346978 | 0 | 0.154221668 | 0 | 0.173004564 | 0 | 0.0294317 |
| TCGA-VQ-A924 | 0.048847519 | 0 | 0 | 0.383427429 | 0 | 0.340318914 | 0.189046175 | 0.210772934 | 0.084498079 | 0 | 0.078480369 | 0.09194423 | 0 | 0.454308866 | 0.228764473 | 0.351851902 | 0.040729342 | 0.060567765 | 0.012625603 | 0.00784901 | 0 | 0 |
| TCGA-VQ-A8P2 | 0.086792827 | 0 | 0.028259585 | 0.076125194 | 0 | 0.290783953 | 0.061414637 | 0.028018574 | 0.090121452 | 0 | 0.077085216 | 0 | 0 | 0.145932392 | 0.055838236 | 0.168958954 | 0.008194169 | 0 | 0 | 0.074680421 | 0.000949764 | 0 |
| TCGA-D7-6526 | 0.130928793 | 0 | 0.035909489 | 0.063411524 | 0 | 0.43342582 | 0.012759068 | 0.009290059 | 0.117285678 | 0 | 0.139624328 | 0 | 0.02223661 | 0.227016912 | 0.037572274 | 0.162393772 | 0.016103522 | 0.030609829 | 0 | 0.114745779 | 0.006837544 | 0.046986971 |
| TCGA-VQ-AA64 | 0.156768052 | 0 | 0.063690273 | 0.159125985 | 0 | 0.43621529 | 0 | 0.059864347 | 0.126091503 | 0 | 0 | 0.09520908 | 0.00933346 | 0.191186476 | 0.158345168 | 0.159688727 | 0 | 0.019711626 | 0.101676273 | 0 | 0 | 0.006752647 |
| TCGA-CG-5726 | 0.031068431 | 0 | 0.030000042 | 0.087082307 | 0 | 0.376241697 | 0.050889729 | 0.017304357 | 0.060999136 | 0 | 0.055002836 | 0 | 0.014069449 | 0.243996343 | 0.078160984 | 0.131767552 | 0.043824596 | 0 | 0 | 0.076313548 | 0.013108758 | 0.009649071 |
| TCGA-HF-7134 | 0.093370658 | 0 | 0.339140926 | 0.079523049 | 0 | 0.452206606 | 0.000864671 | 0 | 0.125037415 | 0 | 0.176911485 | 0 | 0 | 0.468091069 | 0.094178552 | 0.188251049 | 0.011719198 | 0 | 0 | 0.169788827 | 0 | 0.048746799 |
| TCGA-VQ-A8PU | 0.05471759 | 0.003342577 | 0.033770066 | 0.058279943 | 0 | 0.644555303 | 0 | 0.006318691 | 0.07423028 | 0 | 0.093194931 | 0.019414104 | 0.011778073 | 0.18104598 | 0.049746979 | 0.225604782 | 0.034922212 | 0.036842231 | 0.057735845 | 0.031705401 | 0 | 0.055987105 |
| TCGA-CG-4469 | 0.081339412 | 0 | 0.01459938 | 0.023357115 | 0 | 0.570752933 | 0.014820495 | 0.019157301 | 0.05974522 | 0 | 0.018389544 | 0.047576151 | 0.013926036 | 0.226703525 | 0.10980199 | 0.579105787 | 0.04906088 | 0.08360879 | 0 | 0.27256531 | 0 | 0.160614404 |
| TCGA-CD-5798 | 0.050552097 | 0 | 0.011757541 | 0.192534668 | 0 | 0.368717229 | 0 | 0.004108607 | 0.170392399 | 0 | 0 | 0.134133178 | 0.087506738 | 0.079041217 | 0.113414374 | 0.463042855 | 0.136604298 | 0.038444885 | 0.075083449 | 0.103311694 | 0 | 0.00498606 |
| TCGA-CG-4443 | 0.033406544 | 5.46E-05 | 0.06357649 | 0.029429706 | 0 | 0.162958122 | 0.00996695 | 0.035027846 | 0.093197947 | 0.014957463 | 0.049413677 | 0 | 0.030409279 | 0.114208791 | 0.049188957 | 0.442153757 | 0 | 0.001134195 | 0.025821068 | 0.006346379 | 0.001418112 | 0.013151488 |
| TCGA-VQ-A91Y | 0.055970523 | 0.077719945 | 0.11781019 | 0.27693266 | 0 | 0.884626973 | 0.048144432 | 0 | 0.194408974 | 0 | 0 | 0.168288342 | 0.041344885 | 0.146675324 | 0.264556894 | 0.317933218 | 0.058981133 | 0.003306383 | 0.230806089 | 0 | 0 | 0 |
| TCGA-D7-8576 | 0.045608311 | 0.044784092 | 0.088063915 | 0.074402652 | 0 | 0.334177632 | 0.024999538 | 0.033334682 | 0.098261556 | 0 | 0.022373941 | 0.013765179 | 0 | 0.395791499 | 0.080534865 | 0.351162134 | 0.080686538 | 0.03775827 | 0.217520869 | 0 | 0 | 0.034749688 |
| TCGA-F1-6874 | 0.099619369 | 0 | 0.008477079 | 0.18009396 | 0 | 0.613896658 | 0.137679952 | 0 | 0.108550325 | 0 | 0.276952866 | 0 | 0 | 1.175967407 | 0.228765976 | 0.163744275 | 0 | 0 | 0 | 0.352441488 | 0 | 0.123056377 |
| TCGA-D7-6520 | 0.123712463 | 0 | 0.072800171 | 0.096776039 | 0 | 0.307150895 | 0.036097454 | 0.068322632 | 0.269380138 | 0 | 0.041900264 | 0.044676275 | 0.039660319 | 0.209219592 | 0.180040375 | 0.297765048 | 0.022115462 | 0.022168199 | 0.142504115 | 0 | 0 | 0.008958012 |
| TCGA-VQ-A91U | 0.020471327 | 0.022432583 | 0.204599259 | 0.460343069 | 0 | 0.156487413 | 0.151433048 | 0.174853188 | 0.206372986 | 0 | 0.004537701 | 0.062169547 | 0.000265966 | 0.318416376 | 0.130350545 | 0.230007099 | 0.072790633 | 0 | 0.01159943 | 0.023426938 | 0 | 0.002736747 |
| TCGA-HU-A4H2 | 0.048832123 | 0.033711693 | 0.127242473 | 0.229830611 | 0 | 0.203923199 | 0.062605234 | 0.090439598 | 0.137765841 | 0 | 0 | 0.04407005 | 0.014549914 | 0.107026354 | 0.112849039 | 0.101767327 | 0.048842049 | 0.024147566 | 0.088453929 | 0.007727604 | 0 | 0.00906095 |
| TCGA-F1-A72C | 0.155651405 | 0 | 0.205763179 | 0.280837791 | 0 | 0.359515878 | 0 | 0.10772865 | 0.167572616 | 0 | 0 | 0.167145975 | 0.01104014 | 0.241798801 | 0.259218122 | 0.258494 | 0.007183305 | 0.012184443 | 0.089677405 | 0.00043029 | 0.003160998 | 0.00951443 |
| TCGA-VQ-A8PJ | 0.073247243 | 0 | 0.064805941 | 0.085252897 | 0 | 0.431903684 | 0 | 0 | 0.122970112 | 0 | 0.07790622 | 0 | 0 | 0.331680569 | 0.113907847 | 0.185816529 | 0 | 0.026872022 | 0 | 0.089953411 | 0 | 0.008076644 |
| TCGA-VQ-A8E2 | 0.148493104 | 0 | 0.066702914 | 0.276669031 | 0 | 0.4469602 | 0.11986368 | 0.133158229 | 0.123382674 | 0 | 0.056795123 | 0.048446014 | 0 | 0.488477439 | 0.183515346 | 0.210451611 | 0.033595013 | 0 | 0.05812154 | 0.009355658 | 0 | 0 |
| TCGA-D7-6527 | 0.034652478 | 0 | 0.247464433 | 0.098370493 | 0 | 0.339596067 | 0.026770661 | 0.01397769 | 0.093285324 | 0 | 0.049632398 | 0 | 0.011570987 | 0.300246828 | 0.112307491 | 0.10151002 | 0.021341151 | 0.009011461 | 0.003453781 | 0.085889581 | 0 | 0.052285605 |
| TCGA-VQ-A94R | 0.184229735 | 0 | 0.016268482 | 0.231677228 | 0 | 0.538919388 | 0.05213688 | 0.079529949 | 0.099496341 | 0 | 0.085854788 | 0 | 0.039000131 | 0.11806111 | 0.276417397 | 0.273605305 | 0.024851877 | 0 | 0.074147242 | 0 | 0 | 0 |
| TCGA-MX-A5UJ | 0.176352936 | 0.007674033 | 0.071376835 | 0.152345198 | 0 | 0.35576062 | 0.035851621 | 0.090235501 | 0.133989708 | 0 | 0 | 0.102467729 | 0.038738082 | 0.123698321 | 0.149113605 | 0.182280282 | 0 | 0.022788153 | 0.173497498 | 0 | 0 | 0.019495212 |
| TCGA-VQ-A8DV | 0.04920086 | 0.030905606 | 0.015642547 | 0.20195836 | 0 | 0.097170872 | 0.030090671 | 0.041069966 | 0.062254949 | 0 | 0.025822589 | 0 | 0.02037789 | 0.172684214 | 0.064555822 | 0.113790134 | 0.007681077 | 0.018586546 | 0.109503097 | 0.029549129 | 0 | 0.025164036 |
| TCGA-VQ-A925 | 0.105756962 | 0 | 0.033831095 | 0.25305144 | 0 | 0.526667675 | 0.02685071 | 0.041633433 | 0.109897894 | 0 | 0.018209311 | 0 | 0.020582664 | 0.066962445 | 0.096393597 | 0.102524345 | 0.017560338 | 0.018570365 | 0.082195001 | 0.04908343 | 0 | 0.004572888 |
| TCGA-VQ-A8P3 | 0.04183236 | 0 | 0.008000304 | 0.349998113 | 0 | 0.201141287 | 0.092645741 | 0.059199025 | 0.103576137 | 0 | 0.012506626 | 0.073629315 | 0.016170137 | 0.067109265 | 0.056030269 | 0.100765999 | 0.02246092 | 0.001062317 | 0.111093566 | 0 | 0 | 0.006499493 |
| TCGA-HF-7132 | 0.057720396 | 0.212139726 | 0.301894435 | 0.461490921 | 0 | 0.477216335 | 0.088826456 | 0.083548998 | 0.240749353 | 0.039831708 | 0 | 0.036788336 | 0 | 0.332961523 | 0.236876547 | 0.303104704 | 0.096765244 | 0 | 0.182334109 | 0 | 0 | 0.023513274 |
| TCGA-CD-5799 | 0.091861785 | 0 | 0.050494394 | 0.07250748 | 0 | 0.285819113 | 0 | 0.006075344 | 0.093219293 | 0 | 0.005651843 | 0.071011381 | 0.017275328 | 0.385147761 | 0.076842608 | 0.272746472 | 0.02451381 | 0.042874176 | 0 | 0.113218521 | 0 | 0.026576986 |
| TCGA-D7-5578 | 0.13891519 | 0 | 0.385551657 | 0.271730416 | 0 | 0.186968871 | 0.120159976 | 0.098643457 | 0.226169571 | 0 | 0.030404874 | 0.032157323 | 0.066947951 | 0.362608387 | 0.168903301 | 0.24257551 | 0.095689454 | 0 | 0.127975278 | 0.033655086 | 0 | 0.014743591 |
| TCGA-CG-4460 | 0.112514085 | 0 | 0.138050796 | 0.116702033 | 0 | 0.335565616 | 0.085414694 | 0.027481047 | 0.078886189 | 0 | 0.034350405 | 0 | 0.010045222 | 0.246204529 | 0.171181163 | 0.320777996 | 0.03922538 | 0 | 0 | 0.171706359 | 0.049858576 | 0.026629217 |
| TCGA-HU-A4GH | 0.131968434 | 0 | 0.114112534 | 0.084357448 | 0 | 0.324316539 | 0.040819773 | 0.015991596 | 0.205695712 | 0 | 0.066971007 | 0.002472796 | 0.005950374 | 0.234041095 | 0.053630471 | 0.12330273 | 0.036553618 | 0.007129353 | 0 | 0.063452553 | 0 | 0.054248313 |
| TCGA-CG-5719 | 0.014477681 | 0.040292926 | 0.195695487 | 0.055995055 | 0 | 0.399232448 | 0 | 0 | 0.198041815 | 0.000402404 | 0 | 0.075601124 | 0.027465464 | 0.733882129 | 0.059508543 | 0.236586893 | 0.044890375 | 0 | 0.024848428 | 0.048187882 | 0 | 0.032336269 |
| TCGA-CG-4440 | 0.050305018 | 0 | 0 | 0.035665197 | 0 | 0.296371821 | 0.068861354 | 0.062949683 | 0.074519788 | 0.005793243 | 0.088245726 | 0 | 0 | 0.133506746 | 0.115654 | 0.479190717 | 0.019790067 | 0.056597074 | 0.081064015 | 0.025256692 | 0.04559466 | 0.176196601 |
| TCGA-VQ-A91K | 0.056562656 | 0 | 0.005263587 | 0.18607396 | 0 | 0.610746105 | 0.022142921 | 0.067421227 | 0.250188268 | 0 | 0.037928311 | 0.050197017 | 0.007308604 | 0.291070948 | 0.195647679 | 0.459676097 | 0.005168084 | 0.03163882 | 0.081523587 | 0 | 0 | 0.026038086 |
| TCGA-VQ-AA69 | 0.184905684 | 0 | 0.023369827 | 0.561474487 | 0 | 0.137541732 | 0.454054041 | 0.172107427 | 0.004913563 | 0 | 0.202456788 | 0 | 0.069319538 | 0.254860598 | 0.238795891 | 0.453795559 | 0.023601307 | 0.014055437 | 0 | 0.11929124 | 0.001100575 | 0.001685089 |
| TCGA-D7-8573 | 0.109231795 | 0 | 0.027761442 | 0.11456833 | 0 | 0.399097627 | 0.09884347 | 0.069852167 | 0.092653051 | 0 | 0.002120259 | 0.014315427 | 0 | 0.215193641 | 0.15982306 | 0.139019211 | 0.036006371 | 0 | 0.014295847 | 0.027509279 | 0.000749924 | 0.03457939 |
| TCGA-CG-4477 | 0.094756092 | 0 | 0.281149256 | 0.103494264 | 0 | 0.743186619 | 0.315809336 | 0.078529276 | 0 | 0.117265309 | 0.176129651 | 0 | 0 | 0.154258908 | 0.266255295 | 0.483377835 | 0.106183984 | 0.164862709 | 0.022605767 | 0.043964879 | 0.014740062 | 0.160948699 |
| TCGA-BR-8296 | 0.398654067 | 0.140403427 | 0.151484821 | 0.339469969 | 0 | 0.604852591 | 0.107169537 | 0 | 0.274622006 | 0 | 0.079318961 | 0 | 0.035999079 | 0.162463833 | 0.117543157 | 0.154299157 | 0 | 0.086685244 | 0.109393954 | 0.004356811 | 0 | 0.022687254 |
| TCGA-D7-5577 | 0.10123266 | 0 | 0.076459159 | 0.792075232 | 0 | 0 | 0.424062247 | 0.151910446 | 0.26725244 | 1.26E-05 | 0.082255427 | 0.024890141 | 0 | 0.373619135 | 0.382644771 | 0.643453291 | 0.059472834 | 0.007751706 | 0.003418752 | 0.070598631 | 0 | 0.021847677 |
| TCGA-D7-8579 | 0.12367001 | 0.045949293 | 0.147413157 | 0.118731778 | 0 | 0.476071212 | 0 | 0.008594046 | 0.126258407 | 0 | 0 | 0.038404658 | 0.067738304 | 0.148426552 | 0.079362616 | 0.316156958 | 0.139864057 | 0.023274309 | 0.372298829 | 0.067022602 | 0.01934713 | 0.104467079 |
| TCGA-HU-A4GQ | 0.119632295 | 0 | 0.011531311 | 0.150487178 | 0 | 0.260588418 | 0.03914381 | 0.077228087 | 0.066117522 | 0.041728123 | 0.019434863 | 0.048428296 | 0.019334416 | 0.077309645 | 0.271430851 | 0.241936556 | 0.041504486 | 0.104473222 | 0.1116629 | 0 | 0 | 0.014611979 |
| TCGA-HU-A4H5 | 0.111084968 | 0 | 0.316373911 | 0.155394234 | 0 | 0.241920777 | 0.041426472 | 0.00119408 | 0.156836751 | 0.002020158 | 0.105226507 | 0 | 0 | 0.550399496 | 0.097549733 | 0.15502848 | 0 | 0 | 0 | 0.08148867 | 0 | 0.036324513 |
| TCGA-HU-8249 | 0.176933557 | 0 | 0 | 0.17255892 | 0 | 0.298948352 | 0.220237859 | 0.086166882 | 0.115371908 | 0 | 0 | 0.186229383 | 0 | 0.307574099 | 0.127800975 | 0.132652058 | 0 | 0.045999965 | 0 | 0.264871874 | 0 | 0.016691447 |
| TCGA-HF-7133 | 0.082135406 | 0 | 0.13882415 | 0.233266326 | 0 | 0.671611001 | 0.106297467 | 0.025460885 | 0.23618563 | 0 | 0.013803261 | 0.02819664 | 0 | 0.650856921 | 0.19857752 | 0.485324908 | 0 | 0.009113189 | 0.190572109 | 0.019997312 | 0 | 0.077361747 |
| TCGA-D7-8575 | 0.0837589 | 0.033563214 | 0.278047532 | 0.137352291 | 0 | 0.415810702 | 0 | 0.040857384 | 0.149002017 | 0 | 0 | 0.03548698 | 0 | 1.462626848 | 0.065205159 | 0.326874758 | 0.007986297 | 0.051995246 | 0 | 0.220101923 | 0 | 0.010687343 |
| TCGA-BR-7704 | 0.047210488 | 0.02543002 | 0.253759679 | 0.569764212 | 0 | 0.629471078 | 0.175950082 | 0.081528049 | 0.359368558 | 0 | 0 | 0.120686895 | 0.012673964 | 0.229688289 | 0.311396412 | 0.362757841 | 0.177204125 | 0 | 0 | 0.014796847 | 0 | 0 |
| TCGA-BR-8080 | 0.16652566 | 0.091195225 | 0.159309497 | 0.346358691 | 0 | 0.435088989 | 0.087024602 | 0 | 0.217533076 | 0.031576477 | 0 | 0.119463792 | 0.040966151 | 0.305753103 | 0.145749403 | 0.302491117 | 0.074318783 | 0 | 0.029795758 | 0.1110344 | 0.032187054 | 0.018790641 |
| TCGA-VQ-A8PE | 0.217874494 | 0 | 0.183644475 | 0.270683645 | 0 | 0.448644338 | 0.131785653 | 0.097365528 | 0.206792923 | 0 | 0.032357163 | 0.000737478 | 0 | 0.488527405 | 0.162988022 | 0.229055125 | 0 | 0.044524585 | 0.019758554 | 0.037696678 | 0 | 0.016876937 |
| TCGA-VQ-A923 | 0.21467037 | 0 | 0.143820301 | 0.699541822 | 0 | 0.63107784 | 0.198066975 | 0.248384313 | 0.288136044 | 0.05243062 | 0.111660096 | 0 | 0 | 0.341107527 | 0.395235368 | 0.178647551 | 0.074813331 | 0 | 0.153248198 | 0.002763077 | 0 | 0 |
| TCGA-R5-A805 | 0.037537219 | 0.021720441 | 0.054530211 | 0.116123725 | 0 | 0.503092033 | 0 | 0 | 0.234752449 | 0 | 0.020731756 | 0.009200404 | 0.057045495 | 0.558589094 | 0.042327932 | 0.27375515 | 0 | 0.171683045 | 0.012550348 | 0.282223791 | 0 | 0.452583667 |
| TCGA-HU-A4G9 | 0.056153931 | 0.030025537 | 0.013331561 | 0.065811113 | 0 | 0.238993198 | 0.024278951 | 0.034866988 | 0.107406316 | 0 | 0.039032608 | 0.017362952 | 0.007653658 | 0.24647134 | 0.084662953 | 0.120964112 | 0.002871228 | 0.055832784 | 0.050184429 | 0.007172242 | 0.000922137 | 0.024544261 |
| TCGA-BR-8676 | 0.036602312 | 0 | 0.014126385 | 0.427551802 | 0 | 0.002191193 | 0.243349349 | 0.010737017 | 0.125282195 | 0.215825822 | 0 | 0 | 0 | 0 | 0.118582943 | 0.383018287 | 0.049370638 | 0 | 0 | 0.02645888 | 0 | 0.039247665 |
| TCGA-CG-5718 | 0.065023265 | 0 | 0.166540794 | 0.110737222 | 0 | 0.446813557 | 0.01727536 | 0.045405557 | 0.170014917 | 0 | 0.013739875 | 0.072967739 | 0.02426517 | 0.340488096 | 0.126132447 | 0.189416054 | 0.014857863 | 0 | 0 | 0.16276605 | 0 | 0.101348551 |
| TCGA-VQ-A922 | 0.245050696 | 0 | 0.064067276 | 0.050679763 | 0 | 0.400739735 | 0.038164294 | 0.093532699 | 0.118422977 | 0 | 0.112750281 | 0 | 0 | 0.366020732 | 0.245559438 | 0.236131696 | 0 | 0.005093576 | 0 | 0.094680304 | 0 | 0 |
| TCGA-BR-8289 | 0.086876442 | 0.009732402 | 0.063792733 | 0.152454413 | 0 | 0.290858913 | 0.045497712 | 0.017787108 | 0.061941248 | 0 | 0.019118695 | 0 | 0 | 0.422562093 | 0.104166709 | 0.249174861 | 0.012366434 | 0 | 0.202592927 | 0 | 0 | 0 |
| TCGA-CG-4438 | 0.021580091 | 0.022160774 | 0.031422065 | 0.283096336 | 0 | 0.183109464 | 0.607890284 | 0.074360031 | 0.067527495 | 0.305116629 | 0.083699567 | 0 | 0 | 0.475826679 | 0.290028494 | 0.602899586 | 0.009071474 | 0 | 0.062411956 | 0 | 0.015775995 | 0.009524746 |
| TCGA-D7-6822 | 0.060066093 | 0 | 0.019828397 | 0.246674045 | 0 | 0.423947254 | 0.062844617 | 0.014000732 | 0.078339631 | 0 | 0.133136108 | 0 | 0.00489497 | 0.484721502 | 0.165159194 | 0.180766809 | 0.080806616 | 0 | 0.024993469 | 0.007681664 | 0 | 0.169010454 |
| TCGA-CG-4437 | 0.131477633 | 0 | 0.113688545 | 0.365984129 | 0 | 0.439548543 | 0.111809414 | 0.05247145 | 0.152401099 | 0 | 0.119938449 | 0.045456616 | 0.014777347 | 0.259937458 | 0.2031547 | 0.417059977 | 0.016979469 | 0 | 0.023474687 | 0.041228842 | 0.000588003 | 0.094436808 |
| TCGA-BR-7851 | 0.13623277 | 0 | 0.163829776 | 0.223238465 | 0 | 0.429758642 | 0.125390441 | 0.08096313 | 0.194953421 | 0 | 0.062697786 | 0.064012437 | 0.026582745 | 0.394840172 | 0.186476404 | 0.25481548 | 0.028677129 | 0 | 0.053079721 | 0.067022675 | 0 | 0.018895915 |
| TCGA-BR-8483 | 0.12673581 | 0 | 0.046880549 | 0.108292862 | 0 | 0.137214898 | 0.009095368 | 0.046844021 | 0.092931489 | 0 | 0.026196369 | 0.01055565 | 0 | 0.331662177 | 0.131594615 | 0.136461114 | 0 | 0 | 0.029386175 | 0.00354386 | 0 | 0 |
| TCGA-BR-8284 | 0.107531111 | 0 | 0.121077182 | 0.986457777 | 0 | 0.42259664 | 0.210372563 | 0.084407911 | 0.175467801 | 0.025169 | 0 | 0.096347793 | 0.034574996 | 0.208208891 | 0.199646672 | 0.460743095 | 0.043760367 | 0 | 0.10640602 | 0 | 0 | 0.021060004 |
| TCGA-R5-A7ZE | 0.04721702 | 0 | 0.074873239 | 0.030485026 | 0.096370949 | 0.134139955 | 0.042597697 | 0 | 0.110832959 | 0 | 0.056753084 | 0 | 0.003959989 | 0.298244491 | 0.021095839 | 0.047370006 | 0.081905474 | 0.023987389 | 0 | 0.202634215 | 0 | 0.03053103 |
| TCGA-CD-8527 | 0.067697594 | 0 | 0.046922383 | 0.312018109 | 0 | 0.127968719 | 0.101861192 | 0.054985062 | 0.135620274 | 0 | 0 | 0.133554158 | 0.02339362 | 0.092601297 | 0.102149252 | 0.179079828 | 0.000695607 | 0.070436606 | 0.078217964 | 0 | 0 | 0.016868966 |
| TCGA-EQ-8122 | 0.118485364 | 0 | 0.008225796 | 0.079074273 | 0 | 0.202974699 | 0 | 0 | 0.129184115 | 0 | 0.098901085 | 0 | 0.001197799 | 0.529206013 | 0.055516704 | 0.269326481 | 0 | 0.078805737 | 0.01458711 | 0.066402617 | 0 | 0.059307978 |
| TCGA-VQ-A91D | 0.019935117 | 0.005534749 | 0.023296707 | 0.138340879 | 0 | 0.21357048 | 0.023509005 | 0.146525086 | 0.067980719 | 0.024228697 | 0.133830769 | 0.016073911 | 0 | 0.593646055 | 0.324447747 | 0.220864627 | 0 | 0.022346308 | 0 | 0.221230565 | 0 | 0.021581575 |
| TCGA-RD-A8N6 | 0.134541979 | 0 | 0 | 0.114822037 | 0 | 0.385623977 | 0 | 0 | 0.171935915 | 0 | 0.002552414 | 0.044381354 | 0.009029009 | 0.267209578 | 0.207473781 | 0.368409013 | 0.033712904 | 0 | 0.121505763 | 0 | 0 | 0 |
| TCGA-CG-5732 | 0.140633991 | 0.062557266 | 0.591100133 | 0.412213197 | 0 | 0.339181713 | 0.014125072 | 0.076119589 | 0.222866648 | 0 | 0 | 0.038971014 | 0.008796101 | 0.288385391 | 0.090707189 | 0.198816502 | 0.013482678 | 0.010256734 | 0 | 0.096927549 | 0 | 0.025483238 |
| TCGA-BR-8077 | 0.079581261 | 0 | 0.098949053 | 0.211819141 | 0 | 0.316404303 | 0.101085564 | 0.043124971 | 0.237082646 | 0 | 0 | 0.125172499 | 0.012625622 | 0.373940523 | 0.17131901 | 0.213524928 | 0.09166538 | 0.042669169 | 0.055466655 | 0.013558129 | 0 | 0.008595632 |
| TCGA-VQ-A928 | 0.060355733 | 0 | 0.037109445 | 0.063297071 | 0 | 0.480533704 | 0.002736388 | 0.026819649 | 0.062798402 | 0 | 0.096121506 | 0 | 0.009470219 | 0.542660222 | 0.056825205 | 0.101619483 | 0 | 0.061275093 | 0 | 0.248762072 | 0 | 0.024176572 |
| TCGA-VQ-AA6A | 0.040929296 | 0 | 0.05779221 | 0.100131064 | 0 | 0.512088924 | 0 | 0.027499319 | 0.161539236 | 0 | 0 | 0.093150022 | 0.00173285 | 0.250522291 | 0.103079603 | 0.186161109 | 0.062822495 | 0.001631654 | 0 | 0.150434101 | 0 | 0 |
| TCGA-F1-A448 | 0.182439298 | 0 | 0.130281389 | 0.110892713 | 0 | 0.389150545 | 0 | 0.057852974 | 0.094623671 | 0 | 0.0710886 | 0.005571557 | 0 | 0.773771625 | 0.058194618 | 0.234705988 | 0.049853735 | 0.036271305 | 0 | 0.465570588 | 0 | 0.152332418 |
| TCGA-HU-A4GD | 0.156151691 | 0 | 0.055894668 | 0.076498153 | 0.061040778 | 0.236146393 | 0.091690051 | 0.018289648 | 0.103729439 | 0 | 0.071933718 | 0 | 0.00351031 | 0.052897313 | 0.063449432 | 0.106567987 | 0.079600089 | 0.050201431 | 0.093546606 | 0.012196745 | 0.009301104 | 0.029766156 |
| TCGA-BR-7959 | 0.074801772 | 0 | 0.054564364 | 0.077579736 | 0 | 0.534429626 | 0.039227043 | 0.030475124 | 0.070154664 | 0 | 0.054574544 | 0 | 0.071544597 | 0.285686589 | 0.207888891 | 0.243763878 | 0.020452891 | 0.03035681 | 0.276589747 | 0 | 0 | 0.016197699 |
| TCGA-BR-A4J5 | 0.06872658 | 0.031321708 | 0.038144103 | 0.149855065 | 0 | 0.347226104 | 0.018032493 | 0.051315791 | 0.123150805 | 0 | 0 | 0.044162789 | 0.002344789 | 0.460624112 | 0.073559487 | 0.259154307 | 0.03393132 | 0 | 0.242183212 | 0 | 0 | 0.017374553 |
| TCGA-HU-A4GF | 0.103941553 | 0 | 0.084000797 | 0.017302877 | 0 | 0.371294058 | 0.08048512 | 0.081410866 | 0.16759797 | 0.037310591 | 0.072704596 | 0 | 0.004956935 | 0.537731449 | 0.155739407 | 0.17408996 | 0.009934198 | 0.038851709 | 0.017920678 | 0.016407389 | 0 | 0.132107076 |
| TCGA-D7-A6EZ | 0.068434795 | 0 | 0.056927439 | 0.579614475 | 0 | 0.299481939 | 0.432723659 | 0.090729644 | 0.121707235 | 0.03746536 | 0.137685016 | 0.083483234 | 0 | 0.698758248 | 0.448229689 | 0.53259778 | 0.007705903 | 0.017831429 | 0 | 0.221385541 | 0 | 0.011556307 |
| TCGA-VQ-A91Q | 0.062484042 | 0 | 0.173543075 | 0.055866047 | 0 | 0.480154543 | 0.078324201 | 0.048918888 | 0.123778182 | 0 | 0.089932653 | 0 | 0.013199498 | 0.200792367 | 0.140544667 | 0.168550633 | 0.016710485 | 0.061802176 | 0.120066809 | 0.058689754 | 0 | 0.006990774 |
| TCGA-VQ-A8P8 | 0.183717019 | 0.319409857 | 0.276452313 | 0.135064488 | 0 | 0.384677838 | 0.008878011 | 0.043196263 | 0.169899677 | 0 | 0 | 0.052182807 | 0.008224346 | 0.132872447 | 0.037798353 | 0.074647146 | 0.024190093 | 0.099822406 | 0.282007934 | 0 | 0 | 0 |
| TCGA-HU-8244 | 0.047641723 | 0 | 0.022358608 | 0.058045522 | 0 | 0.240824645 | 0.038174372 | 0.008800196 | 0.103989563 | 0.000593258 | 0.068019658 | 0 | 0.003371523 | 0.155773398 | 0.039322812 | 0.154451251 | 0.031033995 | 0.008995507 | 0 | 0.058554835 | 0.002804634 | 0.003622354 |
| TCGA-R5-A7O7 | 0.052457593 | 0 | 0.053165409 | 0.090519401 | 0 | 0.48634156 | 0.082559819 | 0 | 0.112919173 | 0 | 0.092924333 | 0 | 0.026540416 | 0.045585633 | 0.070532254 | 0.064268775 | 0.013760097 | 0.030819562 | 0 | 0.126041024 | 0 | 0.021810208 |
| TCGA-BR-8373 | 0.158175048 | 0 | 0.057305949 | 0.028479407 | 0 | 0.719333922 | 0.047875354 | 0 | 0.218178539 | 0 | 0.111092617 | 0 | 0.076152836 | 0.636426388 | 0.18309634 | 0.151811639 | 0.017496803 | 0.038801059 | 0.132760469 | 0.018782947 | 0 | 0.013634476 |
| TCGA-D7-A6EX | 0.125047988 | 0.015374575 | 0.009480534 | 0.12460885 | 0 | 0.287458094 | 0.000719967 | 0.047187126 | 0.223846353 | 0.020570073 | 0 | 0.045987236 | 0.021805224 | 0.067176193 | 0.138216279 | 0.179086747 | 0.042821304 | 0 | 0.153865258 | 0 | 0 | 0 |
| TCGA-VQ-A8PF | 0.1627738 | 0 | 0.391866223 | 0.944932777 | 0 | 0.301199593 | 0.440921778 | 0.163234586 | 0.221863411 | 0 | 0.100946013 | 0 | 0.023383363 | 0.205220666 | 0.406656581 | 0.639540204 | 0.158382919 | 0.045565829 | 0.126373208 | 0 | 0 | 0.009093688 |
| TCGA-CG-5721 | 0.077457837 | 0 | 0.105107641 | 1.172155467 | 0 | 0 | 0.670124655 | 0.161168623 | 0.177304506 | 0.254691897 | 0.068088613 | 0.102533944 | 0 | 0.561067599 | 0.548793301 | 0.50537207 | 0.174518774 | 0 | 0.021392178 | 0.000759874 | 0 | 0.030412072 |
| TCGA-VQ-A91Z | 0.05583736 | 0 | 0.030035425 | 0.087057337 | 0 | 0.214357583 | 0 | 0.046499834 | 0.177455539 | 0 | 0.149597436 | 0 | 0 | 0.415587032 | 0.030076007 | 0.174734711 | 0 | 0.011494783 | 0 | 0.090982797 | 0.013880892 | 0.012299397 |
| TCGA-VQ-AA6F | 0.22194226 | 0.231169226 | 0.291731671 | 0.19898064 | 0 | 0.431369967 | 0.023929863 | 0.039993067 | 0.176378755 | 0 | 0 | 0.066422043 | 0 | 0.151265236 | 0.210945498 | 0.140645842 | 0 | 0.035397649 | 0.210266085 | 0 | 0 | 0 |
| TCGA-VQ-A8PK | 0.152170244 | 0 | 0.107963787 | 0 | 0 | 0.544491527 | 0.104821001 | 0.042177941 | 0.090503587 | 0.000376626 | 0.175038267 | 0.131459965 | 0.002537576 | 0.191781288 | 0.244234463 | 0.210229517 | 0.007990684 | 0.042606325 | 0.03964409 | 0.025640194 | 0 | 0.009513619 |
| TCGA-SW-A7EB | 0.216236533 | 0.087613015 | 0.033958415 | 0.284945447 | 0 | 0.488858521 | 0.023080278 | 0.120561293 | 0.219672681 | 0 | 0 | 0.057278697 | 0.029642658 | 0.122107137 | 0.078914756 | 0.156847197 | 0.017019771 | 0.058173816 | 0.024466627 | 0.062262896 | 0 | 0 |
| TCGA-VQ-AA6J | 0.295090544 | 0.109076648 | 0.038899771 | 0.246003854 | 0 | 0.354358275 | 0.093421858 | 0.22352831 | 0.267099342 | 0 | 0.007630163 | 0.030946516 | 0 | 1.08736974 | 0.344659314 | 0.276096161 | 0 | 0 | 0.122100475 | 0 | 0 | 0.001541671 |
| TCGA-HU-A4GT | 0.046854787 | 0 | 0.038128482 | 0.119599723 | 0 | 0.278174732 | 0.076527604 | 0.073669452 | 0.144303882 | 0 | 0.033199906 | 0.005565708 | 0 | 0.321241622 | 0.097738109 | 0.196791038 | 0.030104586 | 0 | 0 | 0.074360472 | 0.004479312 | 0.014784116 |
| TCGA-D7-6528 | 0.107784875 | 0 | 0.012032898 | 0.046637526 | 0 | 0.319198923 | 0.004905418 | 0.032950622 | 0.102516304 | 0 | 0.05936121 | 0.049593413 | 0 | 0.432843964 | 0.11658616 | 0.134547805 | 0 | 0.00224743 | 0 | 0.206153322 | 0 | 0 |
| TCGA-RD-A8MW | 0.044367044 | 0 | 0.410537279 | 0.178573944 | 0 | 0.409797239 | 0.197962173 | 0.028510967 | 0.132186223 | 0 | 0.045990511 | 0 | 0 | 0.793622989 | 0.181503854 | 0.379329053 | 0.023165232 | 0.00330495 | 0 | 0.065070469 | 0 | 0.039655366 |
| TCGA-VQ-A8DU | 0.065346281 | 0.023436915 | 0.063873517 | 0.152711897 | 0 | 0.337234864 | 0 | 0.052403856 | 0.14597798 | 0 | 0 | 0.103958012 | 0.016548027 | 0.15188533 | 0.115161599 | 0.135370199 | 0.038737495 | 0.009159233 | 0.154969181 | 0 | 0 | 0.011479443 |
| TCGA-CD-8529 | 0.301053511 | 0 | 0.371949162 | 0.311752605 | 0 | 0.508004119 | 0.119975754 | 0.047040518 | 0.270982257 | 0 | 0.107710588 | 0 | 0.011664431 | 0.622156576 | 0.229528357 | 0.475260918 | 0.069609498 | 0 | 0.100175234 | 0 | 0 | 0.011025868 |
| TCGA-R5-A7ZF | 0.036573381 | 0 | 0.158647805 | 0.163856704 | 0 | 0.198788661 | 0.112051968 | 0.062810289 | 0.074060341 | 0 | 0.086648155 | 0.006259136 | 0 | 0.149215857 | 0.17994921 | 0.085396384 | 0.015509035 | 0.024399621 | 0 | 0.081644258 | 0.005078966 | 0.012856621 |
| TCGA-KB-A93H | 0.042488696 | 0 | 0 | 0.074528409 | 0 | 0.480578014 | 0.079989365 | 0.023329551 | 0.077437754 | 0 | 0.049320952 | 0 | 0.010661369 | 0.164656986 | 0.139235709 | 0.129784177 | 0.018139763 | 0.027858236 | 0.00693476 | 0.004144265 | 0.00253401 | 0.001625038 |
| TCGA-VQ-A91S | 0.159012107 | 0 | 0 | 0.695383401 | 0 | 0.420882131 | 0.341310622 | 0.007009439 | 0.081583791 | 0 | 0.085616026 | 0 | 0.002505908 | 0.281982147 | 0.311220748 | 0.259456003 | 0.043244035 | 0 | 0.024651497 | 0 | 0 | 0.062620624 |
| TCGA-VQ-A8E0 | 0.094681987 | 0 | 0.02925598 | 0.0545631 | 0 | 0.708462641 | 0 | 0.018416194 | 0.150216249 | 0 | 0.035215369 | 0.039424721 | 0.014079643 | 0.358447882 | 0.083608649 | 0.315560938 | 0.047843857 | 0.034563326 | 0 | 0.177020202 | 0 | 0.06499402 |
| TCGA-CG-4441 | 0.059777114 | 0 | 0.074631336 | 0.181118981 | 0 | 0.347524189 | 0.048076913 | 0.035054267 | 0.149377951 | 0 | 0.009854505 | 0.065316008 | 0 | 0.486041589 | 0.160196954 | 0.322088068 | 0 | 0 | 0 | 0.194519807 | 0 | 0.141371975 |
| TCGA-D7-A4YU | 0.275534962 | 0 | 0.546177828 | 0.369059088 | 0 | 0.333728813 | 0.357237339 | 0.092349018 | 0.373274341 | 0 | 0.166226805 | 0 | 0.001926457 | 0.461378672 | 0.515056313 | 0.443034967 | 0.006249436 | 0.021651329 | 0.138811869 | 0 | 0 | 0.008508136 |
| TCGA-RD-A7BT | 0.08840107 | 0 | 0.071002357 | 0.115296709 | 0 | 0.528874688 | 0.064664731 | 0.088866477 | 0.096934576 | 0 | 0.007433997 | 0.018427026 | 0.005157086 | 0.107883397 | 0.077434959 | 0.128216085 | 0.072207876 | 0 | 0.069772283 | 0.014862243 | 0 | 0.02256758 |
| TCGA-CD-5800 | 0.305162671 | 0 | 0.019165483 | 0.154090587 | 0 | 0.188351668 | 0.008759913 | 0.091562688 | 0.158537681 | 0 | 0.054692182 | 0 | 0 | 0.711747149 | 0.077426245 | 0.20915313 | 0 | 0.039521656 | 0 | 0.055976008 | 0 | 0 |
| TCGA-VQ-A91V | 0.116897445 | 0 | 0.034169468 | 0.069055756 | 0 | 0.46813243 | 0.002486536 | 0.030131226 | 0.076092722 | 0 | 0.130339094 | 0 | 0.030888985 | 0.070068677 | 0.065473905 | 0.134986322 | 0.015316914 | 0.039634825 | 0 | 0.079074438 | 0 | 0.02188033 |
| TCGA-BR-8682 | 0.110482416 | 0.044730055 | 0.012041504 | 0.14658753 | 0 | 0.346324989 | 0 | 0.017870419 | 0.191379056 | 0 | 0.004828885 | 0.054523004 | 0 | 0.699022636 | 0.068452611 | 0.374353093 | 0.101942313 | 0 | 0.315637833 | 0 | 0 | 0 |
| TCGA-ZA-A8F6 | 0.025363792 | 0.049878435 | 0 | 0.059355355 | 0 | 0.341024071 | 0 | 0.015620708 | 0.126616161 | 0.009548569 | 0.016830677 | 0 | 0 | 1.073485719 | 0.059430275 | 0.42556053 | 0.011179359 | 0 | 0.245466265 | 0.007784704 | 0 | 0 |
| TCGA-FP-8631 | 0.128670436 | 0 | 0.155174486 | 0.049652841 | 0 | 0.285939503 | 0.043563301 | 0.027606087 | 0.056994087 | 0 | 0.013087037 | 0.025730008 | 0.001820279 | 0.241763687 | 0.043586948 | 0.152175124 | 0.010822099 | 0.144217641 | 0.178083503 | 0 | 0 | 0.009010819 |
| TCGA-VQ-A8PQ | 1.080115043 | 0.894708267 | 0.03071895 | 0.691570249 | 0.613614325 | 1.070852695 | 0.128843096 | 0 | 0.521355975 | 0 | 0.106999615 | 0 | 0.029863262 | 0.389108111 | 0.245664139 | 0.3075129 | 0 | 0.075222944 | 0.127309609 | 0 | 0 | 0 |
| TCGA-HU-A4H4 | 0.04629829 | 0.091656785 | 0.154033604 | 0.358863916 | 0 | 0.147802161 | 0.264511633 | 0.172682799 | 0.227718361 | 0.012759123 | 0 | 0.044901889 | 0 | 0.427437966 | 0.333541655 | 0.209435888 | 0.00088694 | 0.12700904 | 0.088648867 | 0 | 0 | 0.039482872 |
| TCGA-D7-A6F2 | 0.056792245 | 0 | 0.094877083 | 0.212562512 | 0 | 0.485676631 | 0.024788015 | 0.023170072 | 0.181934601 | 0 | 0.026339982 | 0.085634694 | 0.01105615 | 0.412003765 | 0.104235915 | 0.246376429 | 0.030421788 | 0 | 0.118237941 | 0 | 0.006281002 | 0.007084194 |
| TCGA-VQ-A8PP | 0.261031297 | 0 | 0.047157701 | 0.353584132 | 0 | 0.254459718 | 0.282273733 | 0.167490688 | 0.171974803 | 0 | 0.138421501 | 0 | 0 | 0.242980133 | 0.230873441 | 0.290121857 | 0.02835469 | 0 | 0.050922438 | 0.015773865 | 0 | 0.015945471 |
| TCGA-HU-A4H8 | 0.023587652 | 0 | 0.02240569 | 0.131978111 | 0 | 0.286764861 | 0.099503304 | 0.04008771 | 0.13458165 | 0 | 0.069233462 | 0 | 0.008841092 | 0.128610466 | 0.100888675 | 0.19649734 | 0.019589326 | 0.035917733 | 0.067510374 | 0.00929117 | 0 | 0.006440887 |
| TCGA-CG-5722 | 0.255184113 | 0.044096746 | 0.258258139 | 1.076663551 | 0 | 0.497173464 | 0.016646316 | 0.226335522 | 0.379795543 | 0 | 0 | 0.238509928 | 0.036295703 | 0.16842144 | 0.237930708 | 0.25038954 | 0.085926931 | 0.109892804 | 0.159181112 | 0 | 0.02157126 | 0 |
| TCGA-HF-A5NB | 0.035582633 | 0 | 0 | 0.272197818 | 0 | 0.403422964 | 0.09351537 | 0.097018449 | 0.100204941 | 0.003705374 | 0 | 0.048411104 | 0.005690908 | 0.149540466 | 0.079321007 | 0.217860625 | 0.085711411 | 0 | 0 | 0.114358362 | 0.001565469 | 0.001625442 |
| TCGA-CG-5734 | 0.093991984 | 0 | 0.355637145 | 0.147212182 | 0 | 0.41794046 | 0.043088104 | 0.078506827 | 0.180552177 | 0 | 0.069327913 | 0.041800502 | 0 | 0.636694629 | 0.173291149 | 0.190035333 | 0.05887762 | 0 | 0 | 0.135141546 | 0 | 0.06412335 |
| TCGA-FP-7829 | 0.100422466 | 0 | 0.020490792 | 0.036270362 | 0 | 0.32078701 | 0.015982477 | 0.028862773 | 0.098308821 | 0 | 0.090240086 | 0 | 0.015619674 | 0.751552069 | 0.053851215 | 0.318706062 | 0.044235949 | 0.005182105 | 0.004621149 | 0.072338153 | 0 | 0.036488717 |
| TCGA-CD-5813 | 0.240747934 | 0 | 0.191025294 | 0.496971706 | 0 | 0.238603292 | 0.021726613 | 0.180326561 | 0.376253897 | 0.110275047 | 0 | 0.167724237 | 0.085277425 | 0.183805294 | 0.254880033 | 0.47791015 | 0.225425798 | 0 | 0.066575018 | 0.042627472 | 0.002482374 | 0.001524329 |
| TCGA-CG-4466 | 0.095041748 | 0 | 0.011796815 | 0 | 0 | 0.394352356 | 0.177638178 | 0.003081531 | 0.018448678 | 0.000691272 | 0.1492323 | 0 | 0 | 0.170235752 | 0.143428353 | 0.142692371 | 0.007231048 | 0.023675741 | 0 | 0.0468055 | 0 | 0.073269059 |
| TCGA-VQ-A94O | 0.104760307 | 0 | 0.023887291 | 0.138176433 | 0 | 0.606520873 | 0.08801806 | 0.047384551 | 0.237988671 | 0 | 0.169669151 | 0 | 0 | 0.366170157 | 0.06868316 | 0.141825636 | 0 | 0.008221465 | 0 | 0.143364185 | 0 | 0 |
| TCGA-BR-8059 | 0.041252382 | 0 | 0.205831519 | 0.091452798 | 0 | 0.289726589 | 0.040976843 | 0.012251002 | 0.114127432 | 0 | 0.063735229 | 0.020397828 | 0.007855139 | 0.259220039 | 0.117431617 | 0.195014169 | 0.014436834 | 0.004046591 | 0 | 0.069785994 | 0.001356636 | 0.0045801 |
| TCGA-D7-A6F0 | 0.097564058 | 0 | 0.235000745 | 0.239890224 | 0 | 0.320726393 | 0.150410118 | 0.071353676 | 0.180115659 | 0 | 0.022794474 | 0.055894562 | 0 | 0.481496876 | 0.248571308 | 0.439603722 | 0.046782393 | 0 | 0.029909315 | 0 | 0 | 0 |
| TCGA-VQ-A8PH | 0.069716372 | 0.036504931 | 0.136561427 | 0.194365631 | 0 | 0.469606127 | 0.02300447 | 0.186020211 | 0.146118294 | 0 | 0 | 0.067796463 | 0.007968683 | 0.110866605 | 0.076866165 | 0.084027973 | 0.031006548 | 0.005684515 | 0.040416179 | 0.043569728 | 0 | 0 |
| TCGA-HU-A4G3 | 0.022706635 | 0.027161111 | 0.024691762 | 0.051524298 | 0 | 0.279710723 | 0 | 0.01636854 | 0.058353988 | 0 | 0 | 0.085594758 | 0 | 0.111332909 | 0.03905366 | 0.153927145 | 0.016455552 | 0.006594425 | 0.314017219 | 0.002237258 | 0 | 0.021121221 |
| TCGA-VQ-A91E | 0.180921417 | 0 | 0.358251145 | 0.330391648 | 0 | 0.481172362 | 0.117293352 | 0.083345391 | 0.066086003 | 0 | 0.055064145 | 0.027162258 | 0.027236468 | 0.091339251 | 0.078214425 | 0.118628958 | 0.000815867 | 0.023484149 | 0.006370896 | 0.048317889 | 0 | 0.025119566 |
| TCGA-D7-A74A | 0.021711842 | 0.009549659 | 0.062225565 | 0.176340605 | 0 | 0.329338418 | 0.043047976 | 0.056219973 | 0.159212366 | 0.00287587 | 0 | 0.064817418 | 0.009169309 | 0.035614997 | 0.102456949 | 0.127642497 | 0.08769205 | 0.024115197 | 0.035553952 | 0.010552711 | 0 | 0.001954977 |
| TCGA-HU-A4H6 | 0.201165265 | 0.019493477 | 0.273661353 | 0.090167935 | 0 | 0.260319939 | 0.038359909 | 0.063993315 | 0.128684857 | 0 | 0 | 0.048435287 | 0 | 0.141256434 | 0.094992499 | 0.105080465 | 0.020890331 | 0.030327857 | 0.08070454 | 0.050129424 | 0 | 0.0848487 |
| TCGA-BR-7957 | 0.194452325 | 0 | 0.016818532 | 0.101228331 | 0 | 0.494641601 | 0.032949023 | 0.068904808 | 0.134639519 | 0 | 0.044546749 | 0.0175195 | 0.001172421 | 0.276469012 | 0.119854998 | 0.321557869 | 0.017724656 | 0.015598264 | 0.361206778 | 0 | 0 | 0.059655717 |
| TCGA-BR-8683 | 0.265941598 | 0 | 0 | 0.305827607 | 0 | 0.488589391 | 0.087040699 | 0.129746392 | 0.23842547 | 0 | 0.031109258 | 0.012348644 | 0.007004276 | 0.323098468 | 0.219067668 | 0.253841863 | 0.122827825 | 0.044047055 | 0.136302238 | 0 | 0 | 0 |
| TCGA-VQ-AA68 | 0.304931094 | 0 | 0.046528436 | 0.131933996 | 0 | 0.370123414 | 0.075101948 | 0.095545407 | 0.262685361 | 0 | 0 | 0.069445759 | 0 | 0.219093353 | 0.153130827 | 0.207271609 | 0.029293182 | 0.044701962 | 0.258571555 | 0 | 0 | 0 |
| TCGA-D7-A4Z0 | 0.230344107 | 0.076281985 | 0.030996169 | 0.102198713 | 0 | 0.475669923 | 0.01901415 | 0.026378259 | 0.174764856 | 0 | 0.022028183 | 0.040356987 | 0.053175854 | 0.197539499 | 0.070586125 | 0.129346377 | 0.12693934 | 0.107791659 | 0.245383567 | 0 | 0 | 0.05242976 |
| TCGA-VQ-A91X | 0.070478712 | 0.004410007 | 0.122657353 | 0.073944944 | 0 | 0.232959128 | 0.054104239 | 0.048984805 | 0.078552405 | 0 | 0.065382412 | 0 | 0 | 0.116053961 | 0.047416369 | 0.08676708 | 0.046961584 | 0.013073096 | 0 | 0.068817411 | 0 | 0 |
| TCGA-VQ-A8PB | 0.093064241 | 0 | 0.0685856 | 0.130579475 | 0 | 0.349877568 | 0.039172235 | 0.056632781 | 0.056846289 | 0 | 0.035328879 | 0.033397632 | 0 | 0.397083726 | 0.063424452 | 0.138811132 | 0 | 0.01143522 | 0 | 0.230507787 | 0.001665146 | 0.023248436 |
| TCGA-KB-A6F7 | 0.125875412 | 0 | 0.128714364 | 0.615508682 | 0 | 0.094187402 | 0.356659458 | 0.097051803 | 0.193436247 | 0 | 0.046241779 | 0.095619829 | 0 | 0.374348333 | 0.138595368 | 0.431391557 | 0.098849964 | 0.023530308 | 0.012231823 | 0.039750924 | 0 | 0.023652063 |
| TCGA-VQ-A8PX | 0.091416428 | 0 | 0.266418618 | 0.284931112 | 0 | 0.578909003 | 0.066357128 | 0.010812525 | 0.163017572 | 0 | 0 | 0.031911634 | 0.031778734 | 0.026782265 | 0.10437806 | 0.076677552 | 0.030995926 | 0.03005045 | 0.001969901 | 0.029304609 | 0 | 0.042006605 |
| TCGA-VQ-A8E7 | 0.051641673 | 0 | 0.038477109 | 0.076905491 | 0 | 0.379416402 | 0.070187996 | 0.022103116 | 0.026450247 | 0 | 0.106527249 | 0 | 0.006985484 | 0.221429223 | 0.111453328 | 0.179909551 | 0.018358035 | 0.009924378 | 0.106450152 | 0.02002933 | 0 | 0.020040231 |
| TCGA-VQ-A91A | 0.116047111 | 0 | 0.07219482 | 0.023522695 | 0 | 0.460193066 | 0 | 0 | 0.054841803 | 0 | 0.176190649 | 0 | 0.044160478 | 0.687682987 | 0.032486051 | 0.340926359 | 0 | 0.168446779 | 0 | 0.371167928 | 0.008463325 | 0.129025047 |
| TCGA-HU-A4HD | 0.075446334 | 0 | 0.054854456 | 0.099996287 | 0 | 0.33552531 | 0.028996388 | 0.003026629 | 0.125883166 | 0 | 0 | 0.018247581 | 0 | 0.320592193 | 0.061728887 | 0.199181045 | 0.014851502 | 0.001420208 | 0.05889448 | 0.064879849 | 0 | 0.012759719 |
| TCGA-HU-8604 | 0.05366571 | 0 | 0.417400555 | 0.558312664 | 0 | 0.104378361 | 0.466639298 | 0.13793596 | 0.168025626 | 0 | 0.248519683 | 0 | 0 | 0.793277042 | 0.244935881 | 0.298550856 | 0.043578563 | 0 | 0 | 0.106618139 | 0 | 0.044632787 |
| TCGA-CG-4442 | 0.047876156 | 0 | 0.028388286 | 0.081934703 | 0 | 0.295135666 | 0.229074877 | 0.006809608 | 0.031392646 | 0 | 0.120649567 | 0 | 0 | 0.183492739 | 0.159667584 | 0.252392075 | 0.010798136 | 0 | 0 | 0.078223109 | 0.020140859 | 0.12234769 |
| TCGA-CD-8525 | 0.15922198 | 0 | 0.25404677 | 0.384238001 | 0 | 0.164434776 | 0.0850097 | 0.104187766 | 0.223341694 | 0 | 0.06305806 | 0.011018989 | 0 | 0.345716638 | 0.228896749 | 0.197948614 | 0 | 0.008283774 | 0.040381626 | 0.019301631 | 0 | 0.025068169 |
| TCGA-ZQ-A9CR | 0.058549354 | 0 | 0.192642142 | 0.198343281 | 0 | 0.512361772 | 0.216127367 | 0 | 0.02342061 | 0.092585268 | 0.072712427 | 0 | 0 | 0.23342265 | 0.177245258 | 0.205828811 | 0.006544185 | 0.064153233 | 0 | 0.199540907 | 0 | 0.034498392 |
| TCGA-RD-A8MV | 0.19640673 | 0.012463206 | 0.207661266 | 0.271968782 | 0 | 0.472014658 | 0.193905253 | 0.096093561 | 0.234990535 | 0 | 0.113764789 | 0 | 0.059801334 | 0.211805572 | 0.237108778 | 0.210766833 | 0.066244748 | 0.091665061 | 0.06907609 | 0.043605069 | 0 | 0.148017739 |
| TCGA-VQ-A91N | 0.127695951 | 0 | 0.203967633 | 0.207577789 | 0 | 0.431005569 | 0.0500551 | 0.058243392 | 0.134338128 | 0 | 0.043230201 | 0.022556436 | 0 | 0.132509583 | 0.099019018 | 0.11317199 | 0.05395903 | 0.025790943 | 0.099827171 | 0 | 0.007753442 | 0 |
| TCGA-VQ-A8P5 | 0.154385516 | 0 | 0.083741067 | 0.170085133 | 0 | 0.198207731 | 0.243608615 | 0.044888206 | 0.074326296 | 0 | 0.162616901 | 0 | 0 | 0.258323322 | 0.200063032 | 0.258125793 | 0.014890377 | 0.024209973 | 0.073044889 | 0 | 0 | 0.061374887 |
| TCGA-CD-8526 | 0.19096194 | 0 | 0.263303205 | 0.229619487 | 0 | 0.404493213 | 0.169407556 | 0.100189542 | 0.202229171 | 0 | 0.009043642 | 0.040044025 | 0.000506743 | 0.304209044 | 0.140357626 | 0.240350837 | 0.064228547 | 0.068044331 | 0.046796689 | 0 | 0 | 0.000803439 |
| TCGA-D7-A6EY | 0.380038662 | 0.059979489 | 0.120343604 | 0.401324312 | 0 | 0.436368191 | 0.178749501 | 0.223014073 | 0.326348581 | 0.023400929 | 0.003241513 | 0.057439928 | 0 | 0.43269647 | 0.337631093 | 0.302541859 | 0.071353002 | 0 | 0.137189513 | 0 | 0 | 0.077021559 |
| TCGA-HU-8610 | 0.101842952 | 0 | 0.044280606 | 0.092373618 | 0 | 0.563756559 | 0.072263236 | 0.102774385 | 0.338239791 | 0 | 0.14646686 | 0 | 0 | 1.015145822 | 0.066396968 | 0.257767809 | 0 | 0.311875332 | 0 | 0.541660132 | 0 | 0.062916746 |
| TCGA-RD-A8N5 | 0.092522221 | 0 | 0.008607971 | 0 | 0 | 0.400765064 | 0 | 0 | 0.04197321 | 0 | 0.139024546 | 0 | 0.010806292 | 0.550599929 | 0.024294338 | 0.374829211 | 0 | 0.063162566 | 0 | 0.306727959 | 0.009142713 | 0.252984007 |
| TCGA-BR-8680 | 0.10287946 | 0.010547331 | 0.020126498 | 0.15893602 | 0 | 0.194404235 | 0.062024376 | 0.105889378 | 0.056120532 | 0 | 0.074398993 | 0 | 0 | 0.194465601 | 0.083808499 | 0.183746768 | 0.050179324 | 0 | 0.02825847 | 0.097779568 | 0.00113488 | 0 |
| TCGA-BR-8686 | 0.284976409 | 0 | 0.295390357 | 0.684409135 | 0 | 0.464924863 | 0.160832266 | 0.098083494 | 0.115112768 | 0.055914978 | 0 | 0 | 0.049434275 | 0.098801329 | 0.32619605 | 0.426143638 | 0.019219458 | 0 | 0.24052822 | 0 | 0 | 0 |
| TCGA-VQ-AA6D | 0.086345512 | 0 | 0.015335984 | 0.06235968 | 0 | 0.496432298 | 0 | 0.108328762 | 0.118686348 | 0 | 0.065691342 | 0 | 0.003289314 | 0.529719564 | 0.129428136 | 0.109445673 | 0 | 0.062740185 | 0 | 0.170960941 | 0 | 0.001802545 |
| TCGA-VQ-A92D | 0.085161123 | 0 | 0.017373716 | 0.09906288 | 0 | 0.340096606 | 0.056199637 | 0.09329929 | 0.145321342 | 0 | 0.088890756 | 0 | 0 | 0.267705726 | 0.128640987 | 0.191800662 | 0.006223343 | 0 | 0 | 0.103265235 | 0 | 0.00430411 |
| TCGA-CG-4436 | 0.132801445 | 0 | 0.020529898 | 0.001987439 | 0 | 0.567896352 | 0.225566303 | 0 | 0 | 0 | 0.046431361 | 0.014049774 | 0 | 0.251851145 | 0.141114198 | 0.229757082 | 0.023159129 | 0 | 0 | 0.379420241 | 0.033036176 | 0.231300176 |
| TCGA-VQ-A8DT | 0.026176323 | 0.014462473 | 0.06285426 | 0.156574582 | 0 | 0.332127375 | 0.101799401 | 0.016205881 | 0.104698433 | 0 | 0.002645563 | 0.036245588 | 0.011844554 | 0.110298507 | 0.049357598 | 0.114154771 | 0.016824075 | 0.034702277 | 0.109295869 | 0.021778744 | 0 | 0.020289316 |
