# Supplementary material for: The Comprehensive Analysis of Competitive Endogenous RNA Networks and Tumor-Infiltrating Immune Cells in Gastric Cancer With Lymph Node Metastasis
Source: Research Square preprint supplement (doi:10.21203/rs.3.rs-1133390/v1), 2021-12-08
Supplement: Supplementary file 4 [file 72493e2c49a29d94a1f66ff2.docx]

| id | B cells naive | B cells memory | Plasma cells | T cells CD8 | T cells CD4 naive | T cells CD4 memory resting | T cells CD4 memory activated | T cells follicular helper | T cells regulatory (Tregs) | T cells gamma delta | NK cells resting | NK cells activated | Monocytes | Macrophages M0 | Macrophages M1 | Macrophages M2 | Dendritic cells resting | Dendritic cells activated | Mast cells resting | Mast cells activated | Eosinophils | Neutrophils |
| --- | --- | --- | --- | --- | --- | --- | --- | --- | --- | --- | --- | --- | --- | --- | --- | --- | --- | --- | --- | --- | --- | --- |
| TCGA-D7-8570 | 0.061005301 | 0 | 0.263303248 | 0.385982714 | 0 | 0.300975606 | 0.339387766 | 0.174247386 | 0.331635246 | 0 | 0 | 0.183984453 | 0 | 0.754860918 | 0.249420601 | 0.537245593 | 0.159142149 | 0 | 0.113507531 | 0 | 0 | 0.009939602 |
| TCGA-D7-6815 | 0.139257612 | 0 | 0.096933173 | 0.038911889 | 0 | 0.393513245 | 0.030196401 | 0 | 0.145965935 | 0 | 0.086817389 | 0 | 0 | 0.625732801 | 0.12550634 | 0.184931215 | 0.039582333 | 0 | 0.047242546 | 0.005805697 | 0 | 0 |
| TCGA-VQ-A8E3 | 0.144111067 | 0 | 0.132252624 | 0.55341253 | 0 | 0 | 0.372677364 | 0.143774425 | 0.161949408 | 0.010984371 | 0.286788102 | 0 | 0 | 0.149164534 | 0.210120308 | 0.235913615 | 0.068132048 | 0.117290179 | 0.078902931 | 0 | 0 | 0.026743073 |
| TCGA-IN-A7NT | 0.089583476 | 0 | 0.022813088 | 0.132417423 | 0 | 0.144816326 | 0.035458793 | 0.084062695 | 0.118783409 | 0 | 0.034438146 | 0.014841193 | 0 | 0.610170769 | 0.067970433 | 0.242273426 | 0 | 0.321823509 | 0 | 0.25743916 | 0 | 0.042398174 |
| TCGA-SW-A7EA | 0.026627331 | 0.007334227 | 0.048304689 | 0.415582654 | 0 | 0.2278303 | 0.153241663 | 0.07146922 | 0.213549587 | 0 | 0 | 0.290314709 | 0.014711921 | 0.120574286 | 0.298836557 | 0.171018031 | 0.087517236 | 0.120057404 | 0.074281539 | 0 | 0.000327266 | 0.014874349 |
| TCGA-BR-8588 | 0.223724025 | 0.007724613 | 0.007686332 | 0.447288519 | 0 | 0.308188929 | 0.131736652 | 0.129912109 | 0.116475365 | 0 | 0 | 0.11844742 | 0.015704371 | 0.216684698 | 0.153324335 | 0.23604784 | 0.030655632 | 0.017251408 | 0.183713725 | 0 | 0.013751865 | 0.087721237 |
| TCGA-CD-8524 | 0.139180206 | 0 | 0.180440028 | 0.377259072 | 0 | 0.316953485 | 0.031837581 | 0.036391771 | 0.16351392 | 0 | 0 | 0.039443363 | 0.028450591 | 0.141769473 | 0.232347741 | 0.193937036 | 0.087820983 | 0 | 0.100521489 | 0 | 0 | 0.005299621 |
| TCGA-D7-6525 | 0.079050765 | 0 | 0.023767847 | 0.207756394 | 0 | 0.212443837 | 0.014347075 | 0.032053397 | 0.230058908 | 0 | 0.058784069 | 0.063748695 | 0 | 0.48757127 | 0.077049863 | 0.431274066 | 0 | 0.085800736 | 0.135939537 | 0 | 0 | 0.042256961 |
| TCGA-VQ-A94T | 0.112990891 | 0 | 0.044395489 | 0.008620666 | 0 | 0.341869376 | 0.004378079 | 0.033301297 | 0.106776744 | 0 | 0.197687402 | 0.048558159 | 0 | 0.166360072 | 0.030271005 | 0.179398989 | 0.011529067 | 0.01000614 | 0 | 0.027401124 | 0.005506221 | 0.010676309 |
| TCGA-BR-8678 | 0.151112755 | 0 | 0.042448022 | 0.353510676 | 0 | 0.059172616 | 0.145930263 | 0.089856246 | 0.116612188 | 0 | 0.119291677 | 0.01621434 | 0.022953344 | 0.560214819 | 0.414154257 | 0.198143945 | 0.002165389 | 0 | 0 | 0.034020949 | 0.026135019 | 0.003055577 |
| TCGA-VQ-AA6G | 0.108637086 | 0 | 0.126261236 | 0.02782079 | 0 | 0.550100041 | 0.004992675 | 0.011518757 | 0.102218973 | 0 | 0.104390355 | 0 | 0.002923055 | 0.324164501 | 0.034714201 | 0.125346978 | 0 | 0.154221668 | 0 | 0.173004564 | 0 | 0.0294317 |
| TCGA-VQ-A924 | 0.048847519 | 0 | 0 | 0.383427429 | 0 | 0.340318914 | 0.189046175 | 0.210772934 | 0.084498079 | 0 | 0.078480369 | 0.09194423 | 0 | 0.454308866 | 0.228764473 | 0.351851902 | 0.040729342 | 0.060567765 | 0.012625603 | 0.00784901 | 0 | 0 |
| TCGA-VQ-A8P2 | 0.086792827 | 0 | 0.028259585 | 0.076125194 | 0 | 0.290783953 | 0.061414637 | 0.028018574 | 0.090121452 | 0 | 0.077085216 | 0 | 0 | 0.145932392 | 0.055838236 | 0.168958954 | 0.008194169 | 0 | 0 | 0.074680421 | 0.000949764 | 0 |
| TCGA-D7-6526 | 0.130928793 | 0 | 0.035909489 | 0.063411524 | 0 | 0.43342582 | 0.012759068 | 0.009290059 | 0.117285678 | 0 | 0.139624328 | 0 | 0.02223661 | 0.227016912 | 0.037572274 | 0.162393772 | 0.016103522 | 0.030609829 | 0 | 0.114745779 | 0.006837544 | 0.046986971 |
| TCGA-CD-A487 | 0.070834369 | 0 | 0.016675018 | 0.126825507 | 0 | 0.20054012 | 0.077460433 | 0.053068233 | 0.102375023 | 0.008776125 | 0 | 0.094659077 | 0 | 0 | 0.032172175 | 0.130632658 | 0.011763591 | 0.11753832 | 0.261267824 | 0 | 0 | 0.206053014 |
| TCGA-VQ-AA64 | 0.156768052 | 0 | 0.063690273 | 0.159125985 | 0 | 0.43621529 | 0 | 0.059864347 | 0.126091503 | 0 | 0 | 0.09520908 | 0.00933346 | 0.191186476 | 0.158345168 | 0.159688727 | 0 | 0.019711626 | 0.101676273 | 0 | 0 | 0.006752647 |
| TCGA-CG-5726 | 0.031068431 | 0 | 0.030000042 | 0.087082307 | 0 | 0.376241697 | 0.050889729 | 0.017304357 | 0.060999136 | 0 | 0.055002836 | 0 | 0.014069449 | 0.243996343 | 0.078160984 | 0.131767552 | 0.043824596 | 0 | 0 | 0.076313548 | 0.013108758 | 0.009649071 |
| TCGA-HF-7134 | 0.093370658 | 0 | 0.339140926 | 0.079523049 | 0 | 0.452206606 | 0.000864671 | 0 | 0.125037415 | 0 | 0.176911485 | 0 | 0 | 0.468091069 | 0.094178552 | 0.188251049 | 0.011719198 | 0 | 0 | 0.169788827 | 0 | 0.048746799 |
| TCGA-VQ-A8PU | 0.05471759 | 0.003342577 | 0.033770066 | 0.058279943 | 0 | 0.644555303 | 0 | 0.006318691 | 0.07423028 | 0 | 0.093194931 | 0.019414104 | 0.011778073 | 0.18104598 | 0.049746979 | 0.225604782 | 0.034922212 | 0.036842231 | 0.057735845 | 0.031705401 | 0 | 0.055987105 |
| TCGA-BR-6709 | 0.08307598 | 0 | 0.258111893 | 0.994018947 | 0 | 0.61914508 | 0.266994792 | 0.078572443 | 0.209160381 | 0 | 0.041408107 | 0 | 0.037347031 | 0.556341134 | 0.408053471 | 0.693963129 | 0 | 0 | 0.00195296 | 0 | 0 | 0 |
| TCGA-BR-6803 | 0.187834598 | 0 | 0.187574669 | 0.431651148 | 0 | 0.349619104 | 0.021076546 | 0.060384645 | 0.204638571 | 0.018390928 | 0 | 0.081783872 | 0.01930644 | 0.1022814 | 0.153778515 | 0.263770757 | 0.031413324 | 0 | 0.17583495 | 0 | 0 | 0 |
| TCGA-HU-A4GP | 0.093927621 | 0.023458209 | 0.004101359 | 0.139933547 | 0 | 0.465209031 | 0.005071688 | 0.055353692 | 0.064039575 | 0 | 0 | 0.024142115 | 0.010849743 | 0.169063922 | 0.059179275 | 0.155522442 | 0.04168186 | 0.017401224 | 0.077497966 | 0.038785945 | 0.000363031 | 0.015205459 |
| TCGA-D7-A4YX | 0.125493011 | 0 | 0 | 0.648346589 | 0 | 0.159177907 | 0.406086718 | 0.20280382 | 0.118742014 | 0.155492609 | 0 | 0 | 0 | 0.135405178 | 0.425857658 | 0.411422086 | 0.063443479 | 0.045905937 | 0.04563387 | 0 | 0 | 0 |
| TCGA-BR-A4J8 | 0.070838759 | 0.043416342 | 0.016261914 | 0.077974168 | 0 | 0.277995131 | 0 | 0.01977519 | 0.079005362 | 0 | 0 | 0.111556014 | 0.007854971 | 0.168903055 | 0.118849751 | 0.130261188 | 0.009348553 | 0.003225783 | 0.115110334 | 0 | 0 | 0 |
| TCGA-CG-4469 | 0.081339412 | 0 | 0.01459938 | 0.023357115 | 0 | 0.570752933 | 0.014820495 | 0.019157301 | 0.05974522 | 0 | 0.018389544 | 0.047576151 | 0.013926036 | 0.226703525 | 0.10980199 | 0.579105787 | 0.04906088 | 0.08360879 | 0 | 0.27256531 | 0 | 0.160614404 |
| TCGA-CG-4304 | 0.082125057 | 0 | 0.356120558 | 0.115447334 | 0 | 0.480260131 | 0.138473144 | 0.020947056 | 0.085640462 | 0.016186504 | 0.044858713 | 0 | 0 | 0.174665849 | 0.17491426 | 0.404840935 | 0.03361064 | 0.022854479 | 0.032826097 | 0.058593612 | 0.000537423 | 0.24023975 |
| TCGA-CD-5798 | 0.050552097 | 0 | 0.011757541 | 0.192534668 | 0 | 0.368717229 | 0 | 0.004108607 | 0.170392399 | 0 | 0 | 0.134133178 | 0.087506738 | 0.079041217 | 0.113414374 | 0.463042855 | 0.136604298 | 0.038444885 | 0.075083449 | 0.103311694 | 0 | 0.00498606 |
| TCGA-CG-4443 | 0.033406544 | 5.46E-05 | 0.06357649 | 0.029429706 | 0 | 0.162958122 | 0.00996695 | 0.035027846 | 0.093197947 | 0.014957463 | 0.049413677 | 0 | 0.030409279 | 0.114208791 | 0.049188957 | 0.442153757 | 0 | 0.001134195 | 0.025821068 | 0.006346379 | 0.001418112 | 0.013151488 |
| TCGA-D7-A6EV | 0.097267346 | 0 | 0.107176688 | 0.081170188 | 0 | 0.471166827 | 0.059890324 | 0.059210509 | 0.141061238 | 0 | 0.036480896 | 0.018009599 | 0.010051795 | 0.205693298 | 0.069840942 | 0.231234363 | 0.029868798 | 0.054374987 | 0.001529943 | 0.099524104 | 0 | 0.026012051 |
| TCGA-BR-8371 | 0.682694094 | 0 | 0.023482084 | 0.185365248 | 0.125141628 | 0.425591954 | 0.031664813 | 0 | 0.218235356 | 0 | 0.006812548 | 0.012328553 | 0.020592402 | 0.123931824 | 0.062034418 | 0.15548697 | 0 | 0.084128084 | 0.078817986 | 0 | 0 | 0 |
| TCGA-VQ-A91Y | 0.055970523 | 0.077719945 | 0.11781019 | 0.27693266 | 0 | 0.884626973 | 0.048144432 | 0 | 0.194408974 | 0 | 0 | 0.168288342 | 0.041344885 | 0.146675324 | 0.264556894 | 0.317933218 | 0.058981133 | 0.003306383 | 0.230806089 | 0 | 0 | 0 |
| TCGA-BR-8081 | 0.196539147 | 0.050971716 | 0.135556138 | 0.406609221 | 0 | 0.266036956 | 0.26505191 | 0.301678497 | 0.229066933 | 0 | 0 | 0.191203123 | 0 | 0.555433316 | 0.397935235 | 0.466289779 | 0.035531199 | 0.073813437 | 0 | 0.128078156 | 0 | 0.018938275 |
| TCGA-D7-8576 | 0.045608311 | 0.044784092 | 0.088063915 | 0.074402652 | 0 | 0.334177632 | 0.024999538 | 0.033334682 | 0.098261556 | 0 | 0.022373941 | 0.013765179 | 0 | 0.395791499 | 0.080534865 | 0.351162134 | 0.080686538 | 0.03775827 | 0.217520869 | 0 | 0 | 0.034749688 |
| TCGA-BR-8367 | 0.12730433 | 0 | 0.049720142 | 0.0920361 | 0 | 0.642080429 | 0.035894153 | 0 | 0.036892153 | 0 | 0.038242487 | 0.02658689 | 0.024541075 | 0.202293235 | 0.094713277 | 0.381697949 | 0.05567708 | 0.010896126 | 0.272105315 | 0 | 0 | 0 |
| TCGA-3M-AB46 | 0.033681264 | 0.003013762 | 0.014602316 | 0.059816053 | 0 | 0.347044627 | 0.030074784 | 0.029376689 | 0.08638799 | 0 | 0.021805941 | 0.011599936 | 0.004791097 | 0.331907377 | 0.105534488 | 0.105769809 | 0.025662633 | 0.004518174 | 0 | 0.042464598 | 0 | 0 |
| TCGA-IN-A6RJ | 0.061257208 | 0.001052709 | 0.039538811 | 0.095201563 | 0 | 0.26741567 | 0 | 0.044470385 | 0.121928409 | 0 | 0 | 0.075030457 | 0.023796048 | 0.03821124 | 0.060751701 | 0.118309146 | 0.061773903 | 0.045455583 | 0.101541871 | 0 | 0 | 0.012642344 |
| TCGA-F1-6874 | 0.099619369 | 0 | 0.008477079 | 0.18009396 | 0 | 0.613896658 | 0.137679952 | 0 | 0.108550325 | 0 | 0.276952866 | 0 | 0 | 1.175967407 | 0.228765976 | 0.163744275 | 0 | 0 | 0 | 0.352441488 | 0 | 0.123056377 |
| TCGA-D7-6520 | 0.123712463 | 0 | 0.072800171 | 0.096776039 | 0 | 0.307150895 | 0.036097454 | 0.068322632 | 0.269380138 | 0 | 0.041900264 | 0.044676275 | 0.039660319 | 0.209219592 | 0.180040375 | 0.297765048 | 0.022115462 | 0.022168199 | 0.142504115 | 0 | 0 | 0.008958012 |
| TCGA-VQ-A91U | 0.020471327 | 0.022432583 | 0.204599259 | 0.460343069 | 0 | 0.156487413 | 0.151433048 | 0.174853188 | 0.206372986 | 0 | 0.004537701 | 0.062169547 | 0.000265966 | 0.318416376 | 0.130350545 | 0.230007099 | 0.072790633 | 0 | 0.01159943 | 0.023426938 | 0 | 0.002736747 |
| TCGA-HU-A4H2 | 0.048832123 | 0.033711693 | 0.127242473 | 0.229830611 | 0 | 0.203923199 | 0.062605234 | 0.090439598 | 0.137765841 | 0 | 0 | 0.04407005 | 0.014549914 | 0.107026354 | 0.112849039 | 0.101767327 | 0.048842049 | 0.024147566 | 0.088453929 | 0.007727604 | 0 | 0.00906095 |
| TCGA-F1-A72C | 0.155651405 | 0 | 0.205763179 | 0.280837791 | 0 | 0.359515878 | 0 | 0.10772865 | 0.167572616 | 0 | 0 | 0.167145975 | 0.01104014 | 0.241798801 | 0.259218122 | 0.258494 | 0.007183305 | 0.012184443 | 0.089677405 | 0.00043029 | 0.003160998 | 0.00951443 |
| TCGA-IN-7808 | 0.746595586 | 0.557342995 | 0.247378299 | 0.626304259 | 0 | 0.7213499 | 0.011067823 | 0.170231933 | 0.401592688 | 0.06190957 | 0 | 0.290765326 | 0 | 0.192922641 | 0.152971134 | 0.304886311 | 0 | 0.013324747 | 0 | 0.045033687 | 0 | 0 |
| TCGA-VQ-A8PJ | 0.073247243 | 0 | 0.064805941 | 0.085252897 | 0 | 0.431903684 | 0 | 0 | 0.122970112 | 0 | 0.07790622 | 0 | 0 | 0.331680569 | 0.113907847 | 0.185816529 | 0 | 0.026872022 | 0 | 0.089953411 | 0 | 0.008076644 |
| TCGA-VQ-A8E2 | 0.148493104 | 0 | 0.066702914 | 0.276669031 | 0 | 0.4469602 | 0.11986368 | 0.133158229 | 0.123382674 | 0 | 0.056795123 | 0.048446014 | 0 | 0.488477439 | 0.183515346 | 0.210451611 | 0.033595013 | 0 | 0.05812154 | 0.009355658 | 0 | 0 |
| TCGA-D7-6527 | 0.034652478 | 0 | 0.247464433 | 0.098370493 | 0 | 0.339596067 | 0.026770661 | 0.01397769 | 0.093285324 | 0 | 0.049632398 | 0 | 0.011570987 | 0.300246828 | 0.112307491 | 0.10151002 | 0.021341151 | 0.009011461 | 0.003453781 | 0.085889581 | 0 | 0.052285605 |
| TCGA-MX-A5UG | 0.300588859 | 0.570137192 | 0.213636518 | 0.337998369 | 0 | 0.923699255 | 0.072592153 | 0.118787083 | 0.233966615 | 0.005661234 | 0.081995448 | 0 | 0.068775071 | 0.337770315 | 0.119795906 | 0.325789286 | 0.018920644 | 0.114244997 | 0.161734943 | 0.092424587 | 0 | 0.073801984 |
| TCGA-CG-5716 | 0.115827592 | 0.107165043 | 0.490077787 | 0.152569212 | 0 | 0.432876321 | 0.00497393 | 0.084809706 | 0.185947557 | 0 | 0.057580197 | 0 | 0 | 0.069144065 | 0.027768293 | 0.124315167 | 0.003834369 | 0.022527892 | 0.030512519 | 0.070312899 | 0 | 0.044468549 |
| TCGA-D7-8572 | 0.157116763 | 0 | 0.131689527 | 0.259417476 | 0 | 0.422424903 | 0.028557585 | 0.168017522 | 0.132312516 | 0 | 0.103720943 | 0 | 0 | 0.962841482 | 0.211421644 | 0.346453852 | 0 | 0 | 0 | 0.233939799 | 0 | 0.052889767 |
| TCGA-RD-A8N0 | 0.131825851 | 0.470089162 | 0.326535018 | 0.464046452 | 0 | 0.622513621 | 0.066318217 | 0.185598467 | 0.1251115 | 0.002064945 | 0 | 0.016054033 | 0.017670923 | 0.069348961 | 0.129453085 | 0.14170015 | 0.016760424 | 0.034680441 | 0.186349687 | 0 | 0 | 0.012989256 |
| TCGA-BR-8381 | 0.085503986 | 0.022085603 | 0.407114044 | 0.954023353 | 0 | 0.053158504 | 0.293647735 | 0.168036209 | 0.333124138 | 0.011467817 | 0 | 0.026423177 | 0 | 0.317651525 | 0.230406945 | 0.454695377 | 0.031795099 | 0.033438393 | 0.053785506 | 0 | 0 | 0 |
| TCGA-CD-8531 | 0.025556298 | 1.57170014 | 1.415092396 | 0.253633113 | 0 | 0.114623908 | 0.285051625 | 0.241547129 | 0.290065071 | 0.120509729 | 0 | 0 | 0 | 0.34493551 | 0 | 0.759285716 | 0 | 0.786429609 | 0.090756431 | 0.018951918 | 0.073322592 | 0.044809665 |
| TCGA-BR-6454 | 0.244693217 | 0 | 0.510470365 | 0.9219114 | 0 | 0 | 0.232929236 | 0.284495604 | 0.279537517 | 0 | 0 | 0.079374489 | 0.030491801 | 0.188758421 | 0.230653159 | 0.209237749 | 0.033806701 | 0.049995279 | 0.041865784 | 0.038522683 | 0 | 0.017986558 |
| TCGA-VQ-A94R | 0.184229735 | 0 | 0.016268482 | 0.231677228 | 0 | 0.538919388 | 0.05213688 | 0.079529949 | 0.099496341 | 0 | 0.085854788 | 0 | 0.039000131 | 0.11806111 | 0.276417397 | 0.273605305 | 0.024851877 | 0 | 0.074147242 | 0 | 0 | 0 |
| TCGA-MX-A5UJ | 0.176352936 | 0.007674033 | 0.071376835 | 0.152345198 | 0 | 0.35576062 | 0.035851621 | 0.090235501 | 0.133989708 | 0 | 0 | 0.102467729 | 0.038738082 | 0.123698321 | 0.149113605 | 0.182280282 | 0 | 0.022788153 | 0.173497498 | 0 | 0 | 0.019495212 |
| TCGA-BR-8364 | 0.19305692 | 0 | 0.05639578 | 0.32479371 | 0 | 0.523809259 | 0 | 0.044085777 | 0.187288381 | 0 | 0.031643797 | 0.057556989 | 0.036160648 | 0.213681297 | 0.145513193 | 0.576576837 | 0.145714195 | 0.032803766 | 0.288778869 | 0 | 0 | 0 |
| TCGA-VQ-A8DV | 0.04920086 | 0.030905606 | 0.015642547 | 0.20195836 | 0 | 0.097170872 | 0.030090671 | 0.041069966 | 0.062254949 | 0 | 0.025822589 | 0 | 0.02037789 | 0.172684214 | 0.064555822 | 0.113790134 | 0.007681077 | 0.018586546 | 0.109503097 | 0.029549129 | 0 | 0.025164036 |
| TCGA-VQ-A925 | 0.105756962 | 0 | 0.033831095 | 0.25305144 | 0 | 0.526667675 | 0.02685071 | 0.041633433 | 0.109897894 | 0 | 0.018209311 | 0 | 0.020582664 | 0.066962445 | 0.096393597 | 0.102524345 | 0.017560338 | 0.018570365 | 0.082195001 | 0.04908343 | 0 | 0.004572888 |
| TCGA-BR-4279 | 0.075855449 | 0 | 0.228783708 | 0.268792007 | 0 | 0.40301779 | 0.254603517 | 0 | 0 | 0.114413963 | 0.040441118 | 0 | 0.133592921 | 0.517976647 | 0.137784899 | 0.483839799 | 0.108397781 | 0.012705898 | 0.05278929 | 0.203370278 | 0.016449964 | 0.166430858 |
| TCGA-VQ-A8P3 | 0.04183236 | 0 | 0.008000304 | 0.349998113 | 0 | 0.201141287 | 0.092645741 | 0.059199025 | 0.103576137 | 0 | 0.012506626 | 0.073629315 | 0.016170137 | 0.067109265 | 0.056030269 | 0.100765999 | 0.02246092 | 0.001062317 | 0.111093566 | 0 | 0 | 0.006499493 |
| TCGA-BR-8372 | 0.011518841 | 0.005368973 | 0.061536613 | 0.660279256 | 0 | 0.13305842 | 0.467559819 | 0.160729635 | 0.111268399 | 0 | 0.098883471 | 0.00370718 | 0.000700635 | 0.425821837 | 0.298495341 | 0.604206019 | 0.248849944 | 0 | 0.08206255 | 0 | 0.004050544 | 0 |
| TCGA-HF-7132 | 0.057720396 | 0.212139726 | 0.301894435 | 0.461490921 | 0 | 0.477216335 | 0.088826456 | 0.083548998 | 0.240749353 | 0.039831708 | 0 | 0.036788336 | 0 | 0.332961523 | 0.236876547 | 0.303104704 | 0.096765244 | 0 | 0.182334109 | 0 | 0 | 0.023513274 |
| TCGA-B7-5818 | 0.034113441 | 0 | 0.020849249 | 0.420065875 | 0 | 0.272391558 | 0.213411391 | 0.074553829 | 0.29299459 | 0 | 0.175258929 | 0 | 0.038023431 | 0.418602089 | 0.255813024 | 0.399578365 | 0.028286155 | 0 | 0.012231918 | 0.010951669 | 0 | 0.018916167 |
| TCGA-CD-5799 | 0.091861785 | 0 | 0.050494394 | 0.07250748 | 0 | 0.285819113 | 0 | 0.006075344 | 0.093219293 | 0 | 0.005651843 | 0.071011381 | 0.017275328 | 0.385147761 | 0.076842608 | 0.272746472 | 0.02451381 | 0.042874176 | 0 | 0.113218521 | 0 | 0.026576986 |
| TCGA-D7-5578 | 0.13891519 | 0 | 0.385551657 | 0.271730416 | 0 | 0.186968871 | 0.120159976 | 0.098643457 | 0.226169571 | 0 | 0.030404874 | 0.032157323 | 0.066947951 | 0.362608387 | 0.168903301 | 0.24257551 | 0.095689454 | 0 | 0.127975278 | 0.033655086 | 0 | 0.014743591 |
| TCGA-BR-6458 | 0.10458849 | 0 | 0.070985268 | 0.509528823 | 0 | 0.509152103 | 0.093837663 | 0.132961721 | 0.256214133 | 0 | 0.001308607 | 0.046334421 | 0.01857452 | 0.498301709 | 0.333759903 | 0.456156761 | 0.09444997 | 0 | 0.048445991 | 0 | 0 | 0.00184282 |
| TCGA-RD-A8N1 | 0.208267412 | 0.233728045 | 0.160468144 | 0.42440526 | 0 | 0.645744376 | 0.090701094 | 0.083459398 | 0.313857498 | 0.022968549 | 0 | 0.104595428 | 0.004241516 | 0.367231934 | 0.188222506 | 0.345693222 | 0.079420963 | 0.049364157 | 0.072323918 | 0 | 0 | 0.000511831 |
| TCGA-CG-4460 | 0.112514085 | 0 | 0.138050796 | 0.116702033 | 0 | 0.335565616 | 0.085414694 | 0.027481047 | 0.078886189 | 0 | 0.034350405 | 0 | 0.010045222 | 0.246204529 | 0.171181163 | 0.320777996 | 0.03922538 | 0 | 0 | 0.171706359 | 0.049858576 | 0.026629217 |
| TCGA-CG-4301 | 0.144892137 | 0 | 0.025892559 | 0.05344443 | 0 | 0.541991234 | 0.064514681 | 0.019592626 | 0.042329102 | 0 | 0 | 0.020152318 | 0 | 0.303066024 | 0.142888875 | 0.543787873 | 0.085220013 | 0.028655135 | 0.258931318 | 0.030981117 | 0.063961917 | 0.030558452 |
| TCGA-BR-7958 | 0.047093122 | 0 | 0.242397953 | 1.488113769 | 0 | 0 | 0.484359603 | 0.149099604 | 0.36461724 | 0.01363303 | 0 | 0.304936948 | 0.000735265 | 0.247721844 | 0.5637411 | 0.423151858 | 0.204350348 | 0.048603819 | 0.157020996 | 0 | 0 | 0.013728241 |
| TCGA-HU-A4GH | 0.131968434 | 0 | 0.114112534 | 0.084357448 | 0 | 0.324316539 | 0.040819773 | 0.015991596 | 0.205695712 | 0 | 0.066971007 | 0.002472796 | 0.005950374 | 0.234041095 | 0.053630471 | 0.12330273 | 0.036553618 | 0.007129353 | 0 | 0.063452553 | 0 | 0.054248313 |
| TCGA-BR-6802 | 0.099917651 | 0.022042682 | 0.104108346 | 0.722866218 | 0 | 0 | 0.437001011 | 0.247380572 | 0.293309654 | 0 | 0.318596322 | 0.000543327 | 0.018257953 | 0.229158136 | 0.104575141 | 0.257997226 | 0.032655131 | 0.3165682 | 0.074991425 | 0 | 0 | 0.028483914 |
| TCGA-BR-8589 | 0.107720575 | 0 | 0.066933815 | 1.422581544 | 0 | 0 | 0.528235908 | 0.279735506 | 0.128322032 | 0.098384195 | 0 | 0 | 0 | 0.145126332 | 0.369643067 | 0.447929675 | 0.244785487 | 0.013633142 | 0.036006404 | 0.003528356 | 0 | 0.006895149 |
| TCGA-RD-A7BS | 0.260464191 | 0.191743208 | 0.084870493 | 0.136136043 | 0.015122779 | 0.349955948 | 0.021173952 | 0.040663983 | 0.180861002 | 0 | 0 | 0.11106142 | 0.002859524 | 0.308232444 | 0.298334151 | 0.142324738 | 0.028771938 | 0.056833553 | 0.157274138 | 0.084159289 | 0 | 0.019948948 |
| TCGA-CG-5719 | 0.014477681 | 0.040292926 | 0.195695487 | 0.055995055 | 0 | 0.399232448 | 0 | 0 | 0.198041815 | 0.000402404 | 0 | 0.075601124 | 0.027465464 | 0.733882129 | 0.059508543 | 0.236586893 | 0.044890375 | 0 | 0.024848428 | 0.048187882 | 0 | 0.032336269 |
| TCGA-BR-8487 | 0.021010975 | 0.008889541 | 0.104453149 | 0.117297326 | 0 | 0.254961263 | 0.063262118 | 0.04610547 | 0.148532366 | 0.020708152 | 0.064511181 | 0.021874938 | 0 | 0.297384319 | 0.230795352 | 0.223432728 | 0.025078687 | 0 | 0.024442672 | 0.001375535 | 0 | 0.003437866 |
| TCGA-FP-A8CX | 0.027639477 | 0.025681812 | 0.260302728 | 0.137574512 | 0 | 0.285927377 | 0.016875116 | 0.04973448 | 0.170391154 | 0 | 0 | 0.059629458 | 0 | 0.266930204 | 0.089150449 | 0.17002847 | 0.031670272 | 0.010076109 | 0.125950668 | 0 | 0 | 0.011982486 |
| TCGA-CG-4440 | 0.050305018 | 0 | 0 | 0.035665197 | 0 | 0.296371821 | 0.068861354 | 0.062949683 | 0.074519788 | 0.005793243 | 0.088245726 | 0 | 0 | 0.133506746 | 0.115654 | 0.479190717 | 0.019790067 | 0.056597074 | 0.081064015 | 0.025256692 | 0.04559466 | 0.176196601 |
| TCGA-VQ-A91K | 0.056562656 | 0 | 0.005263587 | 0.18607396 | 0 | 0.610746105 | 0.022142921 | 0.067421227 | 0.250188268 | 0 | 0.037928311 | 0.050197017 | 0.007308604 | 0.291070948 | 0.195647679 | 0.459676097 | 0.005168084 | 0.03163882 | 0.081523587 | 0 | 0 | 0.026038086 |
| TCGA-VQ-AA69 | 0.184905684 | 0 | 0.023369827 | 0.561474487 | 0 | 0.137541732 | 0.454054041 | 0.172107427 | 0.004913563 | 0 | 0.202456788 | 0 | 0.069319538 | 0.254860598 | 0.238795891 | 0.453795559 | 0.023601307 | 0.014055437 | 0 | 0.11929124 | 0.001100575 | 0.001685089 |
| TCGA-B7-A5TI | 0.155369607 | 0 | 0.18913207 | 0.189626248 | 0 | 0.334978442 | 0.078732398 | 0.076267229 | 0.047573484 | 0 | 0 | 0.033049869 | 0.012416504 | 0.149316261 | 0.204098588 | 0.258608715 | 0.042419852 | 0 | 0.121984804 | 0.025165296 | 0 | 0 |
| TCGA-IN-7806 | 0.113618475 | 0.104083775 | 0.0154753 | 0.056416422 | 0 | 0.298287381 | 0.023154843 | 0 | 0.112843101 | 0 | 0.054591063 | 0 | 0 | 0.369055911 | 0.047336117 | 0.240508314 | 0 | 0 | 0.058114125 | 0 | 0.00033558 | 0 |
| TCGA-CD-8528 | 0.041146951 | 0 | 0 | 0 | 0 | 0.509130776 | 0.042467566 | 0.039334619 | 0.07222442 | 0.030279915 | 0.088518068 | 0.018000811 | 0 | 0.430212983 | 0.124565901 | 0.415982178 | 0.073265286 | 0 | 0 | 0.048636856 | 0 | 0.119275848 |
| TCGA-D7-8573 | 0.109231795 | 0 | 0.027761442 | 0.11456833 | 0 | 0.399097627 | 0.09884347 | 0.069852167 | 0.092653051 | 0 | 0.002120259 | 0.014315427 | 0 | 0.215193641 | 0.15982306 | 0.139019211 | 0.036006371 | 0 | 0.014295847 | 0.027509279 | 0.000749924 | 0.03457939 |
| TCGA-F1-6875 | 0.045098802 | 0.007417583 | 0.03804976 | 0.145351407 | 0 | 0.071571084 | 0 | 0.135204613 | 0.234331586 | 0 | 0.097271651 | 0 | 0.024274797 | 0.458673664 | 0.012643138 | 0.156177435 | 0.00466933 | 0.027402886 | 0 | 0.108574734 | 0.016002474 | 0 |
| TCGA-CG-4477 | 0.094756092 | 0 | 0.281149256 | 0.103494264 | 0 | 0.743186619 | 0.315809336 | 0.078529276 | 0 | 0.117265309 | 0.176129651 | 0 | 0 | 0.154258908 | 0.266255295 | 0.483377835 | 0.106183984 | 0.164862709 | 0.022605767 | 0.043964879 | 0.014740062 | 0.160948699 |
| TCGA-KB-A93J | 0.060615632 | 0 | 0.142559351 | 0.220575719 | 0 | 0.290421266 | 0.140769061 | 0.066608977 | 0.262802116 | 0.018242424 | 0.050216605 | 0.083869063 | 0 | 0.551420117 | 0.325744874 | 0.622195256 | 0.064707395 | 0 | 0.085731306 | 0 | 0 | 0.006522331 |
| TCGA-CD-8534 | 0.159021153 | 0 | 0.023816598 | 0.18122898 | 0 | 0.291558733 | 0 | 0.049060625 | 0.140526344 | 0 | 0 | 0.016372339 | 0 | 0.178135048 | 0.169309766 | 0.270390534 | 0.011966195 | 0 | 0.180861788 | 0 | 0 | 0.009018567 |
| TCGA-BR-8296 | 0.398654067 | 0.140403427 | 0.151484821 | 0.339469969 | 0 | 0.604852591 | 0.107169537 | 0 | 0.274622006 | 0 | 0.079318961 | 0 | 0.035999079 | 0.162463833 | 0.117543157 | 0.154299157 | 0 | 0.086685244 | 0.109393954 | 0.004356811 | 0 | 0.022687254 |
| TCGA-CG-4444 | 0.157879222 | 0 | 0.180674947 | 0.075258027 | 0 | 0.550960143 | 0.06698387 | 0.0430039 | 0.093331231 | 0.020355483 | 0.082929451 | 0 | 0.005435979 | 0.218988869 | 0.139832211 | 0.423309913 | 0.03146232 | 0.005744632 | 0.028496932 | 0.114576487 | 0.046012074 | 0.10014338 |
| TCGA-BR-4368 | 0.194054108 | 0 | 0.054995308 | 0.492830887 | 0 | 0.328891543 | 0.175645757 | 0.233638605 | 0.106680945 | 0.098769094 | 0 | 0.123124725 | 0.027568899 | 0.231656796 | 0.355758631 | 0.410011079 | 0.031520438 | 6.12E-05 | 0.088412014 | 0.000313068 | 0.035782814 | 0.007759242 |
| TCGA-D7-5577 | 0.10123266 | 0 | 0.076459159 | 0.792075232 | 0 | 0 | 0.424062247 | 0.151910446 | 0.26725244 | 1.26E-05 | 0.082255427 | 0.024890141 | 0 | 0.373619135 | 0.382644771 | 0.643453291 | 0.059472834 | 0.007751706 | 0.003418752 | 0.070598631 | 0 | 0.021847677 |
| TCGA-BR-8295 | 0.2369016 | 0 | 0.073713599 | 0.090125871 | 0 | 0.170497129 | 0.026550596 | 0.04694849 | 0.070587588 | 0 | 0 | 0.052634489 | 0.024643779 | 0.143947054 | 0.052831025 | 0.080655066 | 0.008909697 | 0 | 0.059719905 | 0 | 0 | 0 |
| TCGA-D7-8579 | 0.12367001 | 0.045949293 | 0.147413157 | 0.118731778 | 0 | 0.476071212 | 0 | 0.008594046 | 0.126258407 | 0 | 0 | 0.038404658 | 0.067738304 | 0.148426552 | 0.079362616 | 0.316156958 | 0.139864057 | 0.023274309 | 0.372298829 | 0.067022602 | 0.01934713 | 0.104467079 |
| TCGA-IN-A6RI | 0.076194401 | 0 | 0.046293825 | 0.048992058 | 0 | 0.252892001 | 0.005827962 | 0.038177339 | 0.119859534 | 0 | 0.070324619 | 0 | 0 | 0.266990676 | 0.033888917 | 0.200088562 | 0.017505737 | 0.051569449 | 0 | 0.201356325 | 0 | 0.016990064 |
| TCGA-HU-A4G8 | 0.214718444 | 0.066453525 | 0.105092101 | 0.206025176 | 0 | 0.324755405 | 0.203442527 | 0.188453214 | 0.109392066 | 0.021364462 | 0 | 0.06727261 | 0 | 0.368928781 | 0.232793724 | 0.284782143 | 0 | 0.014374866 | 0 | 0.020797422 | 0.010493826 | 0.004370314 |
| TCGA-BR-7197 | 0.141042369 | 0 | 0.059075507 | 0.068351 | 0 | 0.199015347 | 0 | 0.050003723 | 0.074556488 | 0.016955252 | 0.055858064 | 0 | 0 | 0.348349595 | 0.089873476 | 0.143563614 | 0.014129186 | 0 | 0.041189344 | 0 | 0 | 0 |
| TCGA-HU-A4GQ | 0.119632295 | 0 | 0.011531311 | 0.150487178 | 0 | 0.260588418 | 0.03914381 | 0.077228087 | 0.066117522 | 0.041728123 | 0.019434863 | 0.048428296 | 0.019334416 | 0.077309645 | 0.271430851 | 0.241936556 | 0.041504486 | 0.104473222 | 0.1116629 | 0 | 0 | 0.014611979 |
| TCGA-BR-8297 | 0.179693971 | 0.053390108 | 0.046977348 | 0.141874347 | 0 | 0.398487031 | 0.016873311 | 0.049302327 | 0.137055252 | 0.027055215 | 0 | 0.10456166 | 0.005647546 | 0.081975972 | 0.139174708 | 0.172572059 | 0.01532627 | 0 | 0.229516721 | 0 | 0 | 9.77E-05 |
| TCGA-BR-4191 | 0.119130377 | 0 | 0.139092346 | 0.274593884 | 0 | 0.68055881 | 0.270594902 | 0.014828419 | 0.079540977 | 0 | 0.116241647 | 0 | 0.112345223 | 0.234421372 | 0.193004233 | 0.867701386 | 0.339550762 | 0 | 0.099648357 | 0.045388657 | 0.076239479 | 0.047134447 |
| TCGA-IN-AB1X | 0.081307618 | 0 | 0.281617995 | 0.910259796 | 0 | 0.314421479 | 0.241234701 | 0.079309032 | 0.402230626 | 0 | 0.05855314 | 0.043095654 | 0 | 0.244813458 | 0.111429136 | 0.247364321 | 0 | 0.182383247 | 0.043416766 | 0.020187868 | 0 | 0.045801379 |
| TCGA-HU-A4H5 | 0.111084968 | 0 | 0.316373911 | 0.155394234 | 0 | 0.241920777 | 0.041426472 | 0.00119408 | 0.156836751 | 0.002020158 | 0.105226507 | 0 | 0 | 0.550399496 | 0.097549733 | 0.15502848 | 0 | 0 | 0 | 0.08148867 | 0 | 0.036324513 |
| TCGA-HU-8249 | 0.176933557 | 0 | 0 | 0.17255892 | 0 | 0.298948352 | 0.220237859 | 0.086166882 | 0.115371908 | 0 | 0 | 0.186229383 | 0 | 0.307574099 | 0.127800975 | 0.132652058 | 0 | 0.045999965 | 0 | 0.264871874 | 0 | 0.016691447 |
| TCGA-CG-5717 | 0.252113063 | 0 | 0.039743236 | 0.296314451 | 0 | 0.433605955 | 0.074061377 | 0.016826753 | 0.251887213 | 0 | 0.090758532 | 0 | 0.062867644 | 0.150118922 | 0.250273513 | 0.222482592 | 0.102339901 | 0.045096613 | 0.194957203 | 0 | 0 | 0.027269712 |
| TCGA-CG-5723 | 0.052498858 | 0 | 0.184439369 | 0.477020252 | 0 | 0.153124599 | 0.565876936 | 0.058953084 | 0.011292031 | 0.079172533 | 0 | 0.09536062 | 0.011850089 | 0.116535325 | 0.320699978 | 0.392132739 | 0.038741266 | 0.085963252 | 0 | 0.247053711 | 0.036006609 | 0.103791873 |
| TCGA-BR-6456 | 0.148685171 | 0 | 0.015957315 | 0.266002718 | 0 | 0.644371354 | 0.021991433 | 0.054843821 | 0.294027383 | 0 | 0.003398685 | 0.089690222 | 0.021038317 | 0.45340063 | 0.202234759 | 0.361714018 | 0.034071639 | 0 | 0.169640434 | 0 | 0 | 0 |
| TCGA-CD-5801 | 0.040753667 | 0 | 0.08218766 | 1.29080835 | 0 | 0 | 0.381767778 | 0.095179974 | 0.203261443 | 0.037650884 | 0 | 0.058840973 | 0.014081118 | 0.071596862 | 0.292003723 | 0.300260794 | 0.031899157 | 0.027220611 | 0 | 0.027007404 | 0 | 0.002471321 |
| TCGA-3M-AB47 | 0.18160114 | 0 | 0.142472698 | 0.131075625 | 0 | 0.664372622 | 0.070732992 | 0 | 0.062843777 | 0 | 0.055934231 | 0 | 0.014497445 | 0.084143527 | 0.085468317 | 0.168457693 | 0.00631578 | 0 | 0 | 0.04219714 | 0 | 0 |
| TCGA-VQ-A94U | 0.046651932 | 0.02777222 | 0.041659948 | 0.126837121 | 0 | 0.433642247 | 0 | 0 | 0.105305386 | 0 | 0.012842062 | 0.054225879 | 0.031098446 | 0.013805822 | 0.074863798 | 0.336155838 | 0.015893471 | 0.003331468 | 0.094732908 | 0 | 0 | 0.003855715 |
| TCGA-HF-7133 | 0.082135406 | 0 | 0.13882415 | 0.233266326 | 0 | 0.671611001 | 0.106297467 | 0.025460885 | 0.23618563 | 0 | 0.013803261 | 0.02819664 | 0 | 0.650856921 | 0.19857752 | 0.485324908 | 0 | 0.009113189 | 0.190572109 | 0.019997312 | 0 | 0.077361747 |
| TCGA-HJ-7597 | 0.104325555 | 0.067452501 | 0.108908985 | 0.738062489 | 0 | 0.184004896 | 0.178358353 | 0.064640256 | 0.285327486 | 0 | 0.055922104 | 0.180270062 | 0 | 0.199369638 | 0.444456277 | 0.13660528 | 0.024607684 | 0 | 0.044388098 | 0.044295854 | 0 | 0.025705961 |
| TCGA-D7-6524 | 0.064147102 | 0 | 0 | 0.100813034 | 0 | 0.543221015 | 0 | 0.046796378 | 0.217648532 | 0 | 0.027428094 | 0.042429851 | 0.010394831 | 0.477263284 | 0.104139402 | 0.282973238 | 0.188456164 | 0.039826783 | 0 | 0.433760157 | 0.03350144 | 0.329901085 |
| TCGA-VQ-A8PO | 0.237400302 | 0 | 0.130874761 | 0.47028422 | 0 | 0.325190986 | 0.295139874 | 0.272099798 | 0.154397137 | 0 | 0.102855997 | 0 | 0 | 0.43658989 | 0.154087593 | 0.154900236 | 0.024859906 | 0.037203175 | 0 | 0.039994113 | 0 | 0 |
| TCGA-BR-7722 | 0.036353498 | 0.053385166 | 0.016547443 | 0.143788841 | 0 | 0.50268746 | 0 | 0 | 0.138809975 | 0 | 0.000951939 | 0.055202052 | 0.021298583 | 0.156270618 | 0.054398417 | 0.218850615 | 0.042322819 | 0.015465329 | 0.297356591 | 0 | 0 | 0 |
| TCGA-D7-8575 | 0.0837589 | 0.033563214 | 0.278047532 | 0.137352291 | 0 | 0.415810702 | 0 | 0.040857384 | 0.149002017 | 0 | 0 | 0.03548698 | 0 | 1.462626848 | 0.065205159 | 0.326874758 | 0.007986297 | 0.051995246 | 0 | 0.220101923 | 0 | 0.010687343 |
| TCGA-BR-7704 | 0.047210488 | 0.02543002 | 0.253759679 | 0.569764212 | 0 | 0.629471078 | 0.175950082 | 0.081528049 | 0.359368558 | 0 | 0 | 0.120686895 | 0.012673964 | 0.229688289 | 0.311396412 | 0.362757841 | 0.177204125 | 0 | 0 | 0.014796847 | 0 | 0 |
| TCGA-D7-6521 | 0.166307915 | 0.080402216 | 0.123269849 | 0.360537771 | 0 | 0.360487743 | 0.028822433 | 0.070850272 | 0.29330612 | 0 | 0.000892737 | 0 | 0.041036995 | 0.363803557 | 0.152450704 | 0.336451194 | 0.047201096 | 0 | 0.140196403 | 0.043888106 | 0 | 0.019947475 |
| TCGA-BR-8080 | 0.16652566 | 0.091195225 | 0.159309497 | 0.346358691 | 0 | 0.435088989 | 0.087024602 | 0 | 0.217533076 | 0.031576477 | 0 | 0.119463792 | 0.040966151 | 0.305753103 | 0.145749403 | 0.302491117 | 0.074318783 | 0 | 0.029795758 | 0.1110344 | 0.032187054 | 0.018790641 |
| TCGA-CG-4306 | 0.047757614 | 0 | 0.150394407 | 0.134095347 | 0 | 0.590897156 | 0.260241009 | 0 | 0.016517489 | 0 | 0.205348523 | 0 | 0.005357072 | 0.38247871 | 0.108676317 | 0.27011116 | 0.036827949 | 0.014107453 | 0 | 0.322438982 | 0 | 0.172671992 |
| TCGA-IN-8663 | 0.046833808 | 0 | 0.009174911 | 0.090999987 | 0 | 0.382068886 | 0.040278175 | 0.074969533 | 0.045518125 | 0 | 0.048391648 | 0.002920615 | 0 | 0.498227173 | 0.101460688 | 0.311387593 | 0.025467766 | 0 | 0.062267633 | 0 | 0 | 0.005641679 |
| TCGA-VQ-A8PE | 0.217874494 | 0 | 0.183644475 | 0.270683645 | 0 | 0.448644338 | 0.131785653 | 0.097365528 | 0.206792923 | 0 | 0.032357163 | 0.000737478 | 0 | 0.488527405 | 0.162988022 | 0.229055125 | 0 | 0.044524585 | 0.019758554 | 0.037696678 | 0 | 0.016876937 |
| TCGA-VQ-A923 | 0.21467037 | 0 | 0.143820301 | 0.699541822 | 0 | 0.63107784 | 0.198066975 | 0.248384313 | 0.288136044 | 0.05243062 | 0.111660096 | 0 | 0 | 0.341107527 | 0.395235368 | 0.178647551 | 0.074813331 | 0 | 0.153248198 | 0.002763077 | 0 | 0 |
| TCGA-BR-A4CR | 0.159923171 | 0 | 0.07579029 | 0.062888605 | 0 | 0.482050939 | 0.039577476 | 0.010296071 | 0.035705784 | 0 | 0.089561777 | 0 | 0.02613654 | 0.166861255 | 0.057798609 | 0.130954405 | 0.033741703 | 0.012501648 | 0 | 0.120084502 | 0.030735071 | 0.023836601 |
| TCGA-R5-A805 | 0.037537219 | 0.021720441 | 0.054530211 | 0.116123725 | 0 | 0.503092033 | 0 | 0 | 0.234752449 | 0 | 0.020731756 | 0.009200404 | 0.057045495 | 0.558589094 | 0.042327932 | 0.27375515 | 0 | 0.171683045 | 0.012550348 | 0.282223791 | 0 | 0.452583667 |
| TCGA-HU-A4G9 | 0.056153931 | 0.030025537 | 0.013331561 | 0.065811113 | 0 | 0.238993198 | 0.024278951 | 0.034866988 | 0.107406316 | 0 | 0.039032608 | 0.017362952 | 0.007653658 | 0.24647134 | 0.084662953 | 0.120964112 | 0.002871228 | 0.055832784 | 0.050184429 | 0.007172242 | 0.000922137 | 0.024544261 |
| TCGA-BR-8676 | 0.036602312 | 0 | 0.014126385 | 0.427551802 | 0 | 0.002191193 | 0.243349349 | 0.010737017 | 0.125282195 | 0.215825822 | 0 | 0 | 0 | 0 | 0.118582943 | 0.383018287 | 0.049370638 | 0 | 0 | 0.02645888 | 0 | 0.039247665 |
| TCGA-BR-6564 | 0.078064128 | 0.031312616 | 0 | 0.33795667 | 0 | 0.630388065 | 0.015093236 | 0.064047469 | 0.172959825 | 0 | 0 | 0.050835276 | 0.039360507 | 0 | 0.157993511 | 0.336207345 | 0.024889232 | 0 | 0.251247219 | 0 | 0 | 0.00581407 |
| TCGA-CG-5718 | 0.065023265 | 0 | 0.166540794 | 0.110737222 | 0 | 0.446813557 | 0.01727536 | 0.045405557 | 0.170014917 | 0 | 0.013739875 | 0.072967739 | 0.02426517 | 0.340488096 | 0.126132447 | 0.189416054 | 0.014857863 | 0 | 0 | 0.16276605 | 0 | 0.101348551 |
| TCGA-VQ-A922 | 0.245050696 | 0 | 0.064067276 | 0.050679763 | 0 | 0.400739735 | 0.038164294 | 0.093532699 | 0.118422977 | 0 | 0.112750281 | 0 | 0 | 0.366020732 | 0.245559438 | 0.236131696 | 0 | 0.005093576 | 0 | 0.094680304 | 0 | 0 |
| TCGA-BR-6705 | 0.256691024 | 0 | 0.086931821 | 0.291040862 | 0 | 0.342920906 | 0.009412496 | 0.039751303 | 0.250510866 | 0 | 0.010578757 | 0.052087927 | 0.054925276 | 0.320315587 | 0.169245089 | 0.267473977 | 0.003075371 | 0.001019089 | 0.161700951 | 0 | 0 | 0 |
| TCGA-RD-A8N9 | 0.1084901 | 0.002690001 | 0.219907788 | 0.281777093 | 0 | 0.363806402 | 0.043060184 | 0.06066591 | 0.279345368 | 0 | 0 | 0.0534622 | 0.009133303 | 0.179605404 | 0.129790385 | 0.277887642 | 0.059801299 | 0 | 0.217100489 | 0 | 0 | 0.005531224 |
| TCGA-CD-8530 | 0.267853924 | 0.175412556 | 0 | 0.758242699 | 0 | 1.045601538 | 0.038759371 | 0.059016071 | 0.65466248 | 0 | 0 | 0.190505885 | 0.071943669 | 0.362437191 | 0.217273181 | 0.81863224 | 0.329979652 | 0.139669925 | 0.634818002 | 0.545962504 | 0 | 0.010634729 |
| TCGA-BR-8289 | 0.086876442 | 0.009732402 | 0.063792733 | 0.152454413 | 0 | 0.290858913 | 0.045497712 | 0.017787108 | 0.061941248 | 0 | 0.019118695 | 0 | 0 | 0.422562093 | 0.104166709 | 0.249174861 | 0.012366434 | 0 | 0.202592927 | 0 | 0 | 0 |
| TCGA-CG-4438 | 0.021580091 | 0.022160774 | 0.031422065 | 0.283096336 | 0 | 0.183109464 | 0.607890284 | 0.074360031 | 0.067527495 | 0.305116629 | 0.083699567 | 0 | 0 | 0.475826679 | 0.290028494 | 0.602899586 | 0.009071474 | 0 | 0.062411956 | 0 | 0.015775995 | 0.009524746 |
| TCGA-CD-5803 | 0.168333907 | 0.235477716 | 0 | 1.347198969 | 0 | 0.335374421 | 0.184529026 | 0.193605988 | 0.56555632 | 0.004364642 | 0 | 0.12024189 | 0.02681877 | 0.239955064 | 0.492990499 | 0.584823605 | 0.110709575 | 0.052730852 | 0.174795509 | 0 | 0 | 0 |
| TCGA-D7-6822 | 0.060066093 | 0 | 0.019828397 | 0.246674045 | 0 | 0.423947254 | 0.062844617 | 0.014000732 | 0.078339631 | 0 | 0.133136108 | 0 | 0.00489497 | 0.484721502 | 0.165159194 | 0.180766809 | 0.080806616 | 0 | 0.024993469 | 0.007681664 | 0 | 0.169010454 |
| TCGA-HU-A4GY | 0.438515238 | 0.484949387 | 0 | 0.476350711 | 0 | 0.685145605 | 0.106415661 | 0.078934168 | 0.305040957 | 0 | 0 | 0 | 0.023132781 | 0.433824779 | 0.270306042 | 0.623216602 | 0.019350866 | 0.046590608 | 0.126860511 | 0 | 0 | 0 |
| TCGA-CG-4437 | 0.131477633 | 0 | 0.113688545 | 0.365984129 | 0 | 0.439548543 | 0.111809414 | 0.05247145 | 0.152401099 | 0 | 0.119938449 | 0.045456616 | 0.014777347 | 0.259937458 | 0.2031547 | 0.417059977 | 0.016979469 | 0 | 0.023474687 | 0.041228842 | 0.000588003 | 0.094436808 |
| TCGA-CD-A48A | 0.069758776 | 0 | 0.031644263 | 0.118207416 | 0 | 0.222970658 | 0.030955738 | 0.052286077 | 0.095809288 | 0 | 0 | 0.019478226 | 0.00035411 | 0.323960096 | 0.096646613 | 0.267511045 | 0.030625648 | 0 | 0.031122197 | 0 | 0.014046956 | 0.005756913 |
| TCGA-BR-6710 | 0.010850163 | 0 | 0.269918822 | 0.188297547 | 0 | 0.230361067 | 0.014774623 | 0.00493273 | 0.090267404 | 0 | 0.022332901 | 0.018819117 | 0.01667656 | 0.018126984 | 0.041776227 | 0.094097391 | 0.003636743 | 0.004135621 | 0.169104948 | 0 | 0 | 0.004638131 |
| TCGA-BR-7851 | 0.13623277 | 0 | 0.163829776 | 0.223238465 | 0 | 0.429758642 | 0.125390441 | 0.08096313 | 0.194953421 | 0 | 0.062697786 | 0.064012437 | 0.026582745 | 0.394840172 | 0.186476404 | 0.25481548 | 0.028677129 | 0 | 0.053079721 | 0.067022675 | 0 | 0.018895915 |
| TCGA-BR-6455 | 0.064878055 | 0 | 0.084655271 | 0.848817212 | 0 | 0.202574419 | 0.245709829 | 0.093261561 | 0.154699648 | 0 | 0.07235565 | 0 | 0.019394661 | 0.445739964 | 0.20922933 | 0.406888326 | 0.095224583 | 0 | 0.045253775 | 0.022588637 | 0 | 0 |
| TCGA-BR-8368 | 0.082763423 | 0 | 0.117207551 | 0.263084824 | 0 | 0.427963474 | 0.103535701 | 0.092250421 | 0.206993223 | 0 | 0.035922418 | 0.01143163 | 0.002888288 | 0.136934365 | 0.107626367 | 0.164120541 | 0.018864623 | 0.00130288 | 0.023506522 | 0.022845164 | 0 | 0 |
| TCGA-FP-8211 | 0.090373155 | 0.005927641 | 0.021257573 | 0.182725184 | 0 | 0.522438194 | 0.040880039 | 0.076215206 | 0.160041009 | 0 | 0 | 0.087535838 | 0.011423142 | 0.164563391 | 0.079213259 | 0.103466141 | 0.037407579 | 0.035079421 | 0.06632946 | 0.01160398 | 0 | 0 |
| TCGA-BR-8365 | 0.154977218 | 0 | 0.233107771 | 0.36404495 | 0 | 0.655299989 | 0.036224854 | 0.023707081 | 0.118151312 | 0 | 0 | 0.098138561 | 0.052934231 | 0.023660352 | 0.153408635 | 0.326681872 | 0.02856134 | 0 | 0.263992407 | 0 | 0 | 0 |
| TCGA-BR-8483 | 0.12673581 | 0 | 0.046880549 | 0.108292862 | 0 | 0.137214898 | 0.009095368 | 0.046844021 | 0.092931489 | 0 | 0.026196369 | 0.01055565 | 0 | 0.331662177 | 0.131594615 | 0.136461114 | 0 | 0 | 0.029386175 | 0.00354386 | 0 | 0 |
| TCGA-IN-A7NU | 0.054352083 | 0.036275097 | 0.058310841 | 0.291117259 | 0.058676377 | 0.269471457 | 0.246858362 | 0.029061185 | 0.288122771 | 0.018918904 | 0 | 0 | 0.044231923 | 0.06841046 | 0.258190887 | 0.424723873 | 0.153981379 | 0.003959189 | 0.142038234 | 0.060723199 | 0 | 0.062554537 |
| TCGA-BR-8284 | 0.107531111 | 0 | 0.121077182 | 0.986457777 | 0 | 0.42259664 | 0.210372563 | 0.084407911 | 0.175467801 | 0.025169 | 0 | 0.096347793 | 0.034574996 | 0.208208891 | 0.199646672 | 0.460743095 | 0.043760367 | 0 | 0.10640602 | 0 | 0 | 0.021060004 |
| TCGA-R5-A7ZE | 0.04721702 | 0 | 0.074873239 | 0.030485026 | 0.096370949 | 0.134139955 | 0.042597697 | 0 | 0.110832959 | 0 | 0.056753084 | 0 | 0.003959989 | 0.298244491 | 0.021095839 | 0.047370006 | 0.081905474 | 0.023987389 | 0 | 0.202634215 | 0 | 0.03053103 |
| TCGA-CD-8527 | 0.067697594 | 0 | 0.046922383 | 0.312018109 | 0 | 0.127968719 | 0.101861192 | 0.054985062 | 0.135620274 | 0 | 0 | 0.133554158 | 0.02339362 | 0.092601297 | 0.102149252 | 0.179079828 | 0.000695607 | 0.070436606 | 0.078217964 | 0 | 0 | 0.016868966 |
| TCGA-BR-6707 | 0.072703845 | 0 | 0.216449615 | 0.798469227 | 0 | 0.142918844 | 0.287501863 | 0.07509552 | 0.203176081 | 0 | 0 | 0.094345631 | 0.015548745 | 0.363843496 | 0.225794215 | 0.269904549 | 0.037371117 | 0 | 0.033441904 | 0.004665275 | 0 | 0 |
| TCGA-FP-8209 | 0.759050109 | 0.281066856 | 0 | 0.80824207 | 0 | 0.867558689 | 0.132405215 | 0 | 0.257188148 | 0 | 0 | 0.037080855 | 0.054355989 | 0.278593677 | 0.189133452 | 0.458961591 | 0 | 0.098000528 | 0.276936531 | 0 | 0 | 0.03320972 |
| TCGA-EQ-8122 | 0.118485364 | 0 | 0.008225796 | 0.079074273 | 0 | 0.202974699 | 0 | 0 | 0.129184115 | 0 | 0.098901085 | 0 | 0.001197799 | 0.529206013 | 0.055516704 | 0.269326481 | 0 | 0.078805737 | 0.01458711 | 0.066402617 | 0 | 0.059307978 |
| TCGA-BR-6565 | 0.073569794 | 0.017405704 | 0.163596401 | 0.425184999 | 0 | 0.3310121 | 0.198219992 | 0.146135016 | 0.188682541 | 0 | 0.15489447 | 0 | 0.020848415 | 0.506819863 | 0.219523943 | 0.332918784 | 0.041576184 | 0 | 0.03463937 | 0.007752624 | 0 | 0.006583829 |
| TCGA-FP-8099 | 0.041503224 | 0 | 0.145452539 | 0.07446579 | 0 | 0.392986147 | 0 | 0.014640349 | 0.128360405 | 0 | 0 | 0.104087989 | 0.008225865 | 0.501248089 | 0.176161662 | 0.309123955 | 0 | 0.023977627 | 0.144336941 | 0 | 0 | 0.009613945 |
| TCGA-MX-A663 | 0.151530182 | 0 | 0.012474142 | 0.129815227 | 0 | 0.504687658 | 0 | 0.04708148 | 0.120223809 | 0.010756044 | 0 | 0.076503778 | 0.017400585 | 0.334549048 | 0.134945909 | 0.287822879 | 0.018708577 | 0 | 0 | 0.254887839 | 0 | 0.007120262 |
| TCGA-VQ-A8PC | 0.138665295 | 0.176692872 | 0.215100813 | 0.140678666 | 0 | 0.794790054 | 0.030972989 | 0 | 0.054840624 | 0 | 0.086050688 | 0 | 0.039496426 | 0.119598408 | 0.112811946 | 0.491662522 | 0.060262276 | 0.049027782 | 0.178658253 | 0 | 0.012564187 | 0.045110492 |
| TCGA-VQ-A91D | 0.019935117 | 0.005534749 | 0.023296707 | 0.138340879 | 0 | 0.21357048 | 0.023509005 | 0.146525086 | 0.067980719 | 0.024228697 | 0.133830769 | 0.016073911 | 0 | 0.593646055 | 0.324447747 | 0.220864627 | 0 | 0.022346308 | 0 | 0.221230565 | 0 | 0.021581575 |
| TCGA-RD-A8N6 | 0.134541979 | 0 | 0 | 0.114822037 | 0 | 0.385623977 | 0 | 0 | 0.171935915 | 0 | 0.002552414 | 0.044381354 | 0.009029009 | 0.267209578 | 0.207473781 | 0.368409013 | 0.033712904 | 0 | 0.121505763 | 0 | 0 | 0 |
| TCGA-BR-7715 | 0.069210897 | 0 | 0.004667409 | 0.080847311 | 0 | 0.265884717 | 0.022662606 | 0.035544853 | 0.044716547 | 0 | 0.031645237 | 0.009034102 | 0 | 0.5256806 | 0.088283575 | 0.209496541 | 0.007109433 | 0 | 0.077466509 | 0.009901182 | 0 | 0 |
| TCGA-BR-4280 | 0.095110746 | 0 | 0.197721753 | 0.247179548 | 0 | 0.23876923 | 0.302560213 | 0.081392304 | 0.074673513 | 0 | 0.099838459 | 0 | 0 | 0.251775479 | 0.180069075 | 0.332300069 | 0.024594421 | 0 | 0 | 0.024091771 | 0.002873094 | 0.062716848 |
| TCGA-CG-5732 | 0.140633991 | 0.062557266 | 0.591100133 | 0.412213197 | 0 | 0.339181713 | 0.014125072 | 0.076119589 | 0.222866648 | 0 | 0 | 0.038971014 | 0.008796101 | 0.288385391 | 0.090707189 | 0.198816502 | 0.013482678 | 0.010256734 | 0 | 0.096927549 | 0 | 0.025483238 |
| TCGA-VQ-A8PM | 0.118156234 | 0.082449577 | 0.511522339 | 0.200620441 | 0 | 0.597354205 | 0.047399294 | 0.102931593 | 0.114270102 | 0 | 0 | 0.016358091 | 0.015557801 | 0.095861698 | 0.07481122 | 0.148322481 | 0.040698508 | 0.065521669 | 0.15414222 | 0.002021023 | 0 | 0 |
| TCGA-HU-A4HB | 0.625176685 | 0.294375526 | 0.263651536 | 0.361569381 | 0 | 0.597312544 | 0.105119089 | 0.158240084 | 0.287052192 | 0 | 0 | 0.038346335 | 0 | 0.425972944 | 0.145214056 | 0.201719871 | 0 | 0.026409473 | 0.249872416 | 0 | 0 | 0.000412401 |
| TCGA-BR-8382 | 0.042356777 | 0 | 0.148640443 | 0.127637932 | 0 | 0.362007255 | 0.112963944 | 0.044199539 | 0.134174071 | 0 | 0.084605866 | 0.212717829 | 0.007817068 | 0.293875385 | 0.314222832 | 0.334684034 | 0.084152134 | 0 | 0.032660326 | 0.017398388 | 0 | 0.064302843 |
| TCGA-BR-8077 | 0.079581261 | 0 | 0.098949053 | 0.211819141 | 0 | 0.316404303 | 0.101085564 | 0.043124971 | 0.237082646 | 0 | 0 | 0.125172499 | 0.012625622 | 0.373940523 | 0.17131901 | 0.213524928 | 0.09166538 | 0.042669169 | 0.055466655 | 0.013558129 | 0 | 0.008595632 |
| TCGA-BR-A4IV | 0.040480745 | 0.074900044 | 0.090918179 | 0.142695983 | 0 | 0.504278923 | 0.013758553 | 0 | 0.084361264 | 0 | 0 | 0.053498971 | 0.040819769 | 0.078662774 | 0.061870483 | 0.377530993 | 0.020237923 | 0.023326629 | 0.138712125 | 0.050213439 | 0 | 0.027856933 |
| TCGA-BR-8590 | 0.12615476 | 0.023428889 | 0.145726882 | 0.262375072 | 0 | 0.695594747 | 0.023597555 | 0 | 0.226259788 | 0 | 0 | 0.056840024 | 0.031202903 | 0.268468116 | 0.18248777 | 0.437747828 | 0.045697524 | 0.014461428 | 0.293772395 | 0 | 0 | 0.013257452 |
| TCGA-HU-A4H0 | 0.263428496 | 0 | 0.138544922 | 0.460558328 | 0 | 0.469567971 | 0.424688079 | 0.143163023 | 0.097702149 | 0.22075017 | 0 | 0.070465404 | 0 | 0.049441441 | 0.448857681 | 0.423864221 | 0.077494939 | 0 | 0.135540131 | 0 | 0 | 0 |
| TCGA-BR-4253 | 0.034619498 | 0 | 0.159992463 | 1.381127232 | 0 | 0 | 1.777296993 | 0.073115172 | 0 | 0.471479019 | 0.327901972 | 0 | 0 | 0.56587784 | 0.688509349 | 0.953987642 | 0.046555207 | 0.085377843 | 0.116954482 | 0 | 0.015520854 | 0.092276877 |
| TCGA-VQ-A928 | 0.060355733 | 0 | 0.037109445 | 0.063297071 | 0 | 0.480533704 | 0.002736388 | 0.026819649 | 0.062798402 | 0 | 0.096121506 | 0 | 0.009470219 | 0.542660222 | 0.056825205 | 0.101619483 | 0 | 0.061275093 | 0 | 0.248762072 | 0 | 0.024176572 |
| TCGA-VQ-AA6A | 0.040929296 | 0 | 0.05779221 | 0.100131064 | 0 | 0.512088924 | 0 | 0.027499319 | 0.161539236 | 0 | 0 | 0.093150022 | 0.00173285 | 0.250522291 | 0.103079603 | 0.186161109 | 0.062822495 | 0.001631654 | 0 | 0.150434101 | 0 | 0 |
| TCGA-RD-A8NB | 0.191209417 | 0.066995553 | 0 | 0.229090718 | 0 | 0.632868665 | 0.098769439 | 0.136669825 | 0.295721053 | 0 | 0 | 0.208929117 | 0.003976814 | 0.168254779 | 0.408008652 | 0.330124889 | 0.039235306 | 0.05294142 | 0.178253482 | 0 | 0 | 0.054003733 |
| TCGA-BR-A4CS | 0.027112944 | 0 | 0.035104265 | 0.047787714 | 0 | 0.338040258 | 0.08262254 | 0.004848972 | 0 | 0 | 0.078388732 | 0 | 0.023577391 | 0.164543885 | 0.049914241 | 0.131739248 | 0.008541871 | 0.083382484 | 0 | 0.218840288 | 0 | 0.084180041 |
| TCGA-F1-A448 | 0.182439298 | 0 | 0.130281389 | 0.110892713 | 0 | 0.389150545 | 0 | 0.057852974 | 0.094623671 | 0 | 0.0710886 | 0.005571557 | 0 | 0.773771625 | 0.058194618 | 0.234705988 | 0.049853735 | 0.036271305 | 0 | 0.465570588 | 0 | 0.152332418 |
| TCGA-HU-A4GD | 0.156151691 | 0 | 0.055894668 | 0.076498153 | 0.061040778 | 0.236146393 | 0.091690051 | 0.018289648 | 0.103729439 | 0 | 0.071933718 | 0 | 0.00351031 | 0.052897313 | 0.063449432 | 0.106567987 | 0.079600089 | 0.050201431 | 0.093546606 | 0.012196745 | 0.009301104 | 0.029766156 |
| TCGA-HU-A4GC | 0.065818285 | 0 | 0.084212451 | 0.174096083 | 0 | 0.281064522 | 0.03702343 | 0.027398456 | 0.129283232 | 0 | 0.021514262 | 0.021824008 | 0 | 0.060292372 | 0.130978489 | 0.175212854 | 0.052083599 | 0.003544756 | 0.141381092 | 0 | 0 | 0.005788478 |
| TCGA-CD-A48C | 0.042716809 | 0.045594774 | 0.033607206 | 0.192237408 | 0 | 0.238867821 | 0.01737319 | 0.073210679 | 0.093069321 | 0.044945192 | 0 | 0.122932735 | 0 | 0.21830307 | 0.154203923 | 0.190428054 | 0.066826116 | 0.003077872 | 0 | 0.075802062 | 0 | 0.006934705 |
| TCGA-CD-5804 | 0.079969216 | 0 | 0.070486126 | 0.169098592 | 0 | 0.354639302 | 0.016499589 | 0.023513791 | 0.11999927 | 0 | 0.024999268 | 0.027344341 | 0.023525626 | 0.411651858 | 0.151706274 | 0.312964351 | 0.002208309 | 0 | 0 | 0.052486425 | 0 | 0.067407431 |
| TCGA-HU-8602 | 0.031463625 | 0 | 0.047206416 | 0.278417309 | 0 | 0.688612631 | 0.441078801 | 0.017346282 | 0.034225215 | 0 | 0.259121137 | 0 | 0 | 1.424052695 | 0.497542731 | 0.3229334 | 0 | 0.009427985 | 0 | 0.170887393 | 0.040720221 | 0.128002855 |
| TCGA-BR-8677 | 0.041390388 | 0.01767235 | 0.110594192 | 0.933811635 | 0 | 0.233008904 | 0.116528455 | 0.183574879 | 0.333589821 | 0 | 0 | 0.173214055 | 0.054634422 | 0.074946624 | 0.602014164 | 0.368328367 | 0.032121866 | 0.021161815 | 0.129070226 | 0 | 0 | 0 |
| TCGA-BR-7959 | 0.074801772 | 0 | 0.054564364 | 0.077579736 | 0 | 0.534429626 | 0.039227043 | 0.030475124 | 0.070154664 | 0 | 0.054574544 | 0 | 0.071544597 | 0.285686589 | 0.207888891 | 0.243763878 | 0.020452891 | 0.03035681 | 0.276589747 | 0 | 0 | 0.016197699 |
| TCGA-BR-8366 | 0.11137152 | 0.113213615 | 0.306829263 | 0.770736241 | 0 | 0.270810385 | 0.489956123 | 0.114491977 | 0.126368338 | 0.044302406 | 0 | 0.23228521 | 0.004744424 | 0.486920452 | 0.532462055 | 0.647709677 | 0.111260533 | 0 | 0.125182905 | 0 | 0 | 0.027514176 |
| TCGA-R5-A7ZI | 0.040097424 | 0.033989608 | 0.074302376 | 0.406508334 | 0 | 0.321091876 | 0.146423858 | 0.11814224 | 0.206541881 | 0.012516292 | 0.035616813 | 0 | 0 | 0.130555582 | 0.109254448 | 0.301703237 | 0 | 0.117580945 | 0 | 0.109573357 | 0 | 0.012133626 |
| TCGA-BR-8286 | 0.046893055 | 0 | 0.015246943 | 0.32696966 | 0 | 0.317404809 | 0.107542474 | 0.056321461 | 0.153679339 | 0 | 0 | 0.035737165 | 0.022648025 | 0.218357292 | 0.148240177 | 0.329996768 | 0.114293247 | 0.025629647 | 0.136416348 | 0.125458839 | 0 | 0.005579465 |
| TCGA-BR-A4J5 | 0.06872658 | 0.031321708 | 0.038144103 | 0.149855065 | 0 | 0.347226104 | 0.018032493 | 0.051315791 | 0.123150805 | 0 | 0 | 0.044162789 | 0.002344789 | 0.460624112 | 0.073559487 | 0.259154307 | 0.03393132 | 0 | 0.242183212 | 0 | 0 | 0.017374553 |
| TCGA-BR-7723 | 0.161541882 | 0 | 0.278000494 | 0.363870628 | 0 | 0.274797579 | 0.114638901 | 0.152740104 | 0.162217777 | 0 | 0 | 0.050473447 | 0.001277326 | 0.609363879 | 0.188481982 | 0.330813646 | 0.010395447 | 0 | 0.046662487 | 0 | 0 | 0 |
| TCGA-HU-A4GF | 0.103941553 | 0 | 0.084000797 | 0.017302877 | 0 | 0.371294058 | 0.08048512 | 0.081410866 | 0.16759797 | 0.037310591 | 0.072704596 | 0 | 0.004956935 | 0.537731449 | 0.155739407 | 0.17408996 | 0.009934198 | 0.038851709 | 0.017920678 | 0.016407389 | 0 | 0.132107076 |
| TCGA-D7-A6EZ | 0.068434795 | 0 | 0.056927439 | 0.579614475 | 0 | 0.299481939 | 0.432723659 | 0.090729644 | 0.121707235 | 0.03746536 | 0.137685016 | 0.083483234 | 0 | 0.698758248 | 0.448229689 | 0.53259778 | 0.007705903 | 0.017831429 | 0 | 0.221385541 | 0 | 0.011556307 |
| TCGA-VQ-A91Q | 0.062484042 | 0 | 0.173543075 | 0.055866047 | 0 | 0.480154543 | 0.078324201 | 0.048918888 | 0.123778182 | 0 | 0.089932653 | 0 | 0.013199498 | 0.200792367 | 0.140544667 | 0.168550633 | 0.016710485 | 0.061802176 | 0.120066809 | 0.058689754 | 0 | 0.006990774 |
| TCGA-VQ-A8P8 | 0.183717019 | 0.319409857 | 0.276452313 | 0.135064488 | 0 | 0.384677838 | 0.008878011 | 0.043196263 | 0.169899677 | 0 | 0 | 0.052182807 | 0.008224346 | 0.132872447 | 0.037798353 | 0.074647146 | 0.024190093 | 0.099822406 | 0.282007934 | 0 | 0 | 0 |
| TCGA-RD-A8N4 | 0.176961756 | 0 | 0.083056624 | 0.270312042 | 0 | 0.532376358 | 0.051843254 | 0 | 0.140401119 | 0.012201571 | 0 | 0.010332828 | 0.034105801 | 0 | 0.237582353 | 0.310110082 | 0.005057396 | 0.004878042 | 0.129162208 | 0 | 0.00017154 | 0 |
| TCGA-HU-8244 | 0.047641723 | 0 | 0.022358608 | 0.058045522 | 0 | 0.240824645 | 0.038174372 | 0.008800196 | 0.103989563 | 0.000593258 | 0.068019658 | 0 | 0.003371523 | 0.155773398 | 0.039322812 | 0.154451251 | 0.031033995 | 0.008995507 | 0 | 0.058554835 | 0.002804634 | 0.003622354 |
| TCGA-R5-A7O7 | 0.052457593 | 0 | 0.053165409 | 0.090519401 | 0 | 0.48634156 | 0.082559819 | 0 | 0.112919173 | 0 | 0.092924333 | 0 | 0.026540416 | 0.045585633 | 0.070532254 | 0.064268775 | 0.013760097 | 0.030819562 | 0 | 0.126041024 | 0 | 0.021810208 |
| TCGA-BR-8373 | 0.158175048 | 0 | 0.057305949 | 0.028479407 | 0 | 0.719333922 | 0.047875354 | 0 | 0.218178539 | 0 | 0.111092617 | 0 | 0.076152836 | 0.636426388 | 0.18309634 | 0.151811639 | 0.017496803 | 0.038801059 | 0.132760469 | 0.018782947 | 0 | 0.013634476 |
| TCGA-BR-8058 | 0.190663062 | 0 | 0.177819083 | 0.596958393 | 0 | 0.655618414 | 0.209744188 | 0.072101376 | 0.233249556 | 0 | 0 | 0.078019861 | 0.024066351 | 0.310386928 | 0.305881157 | 0.39829251 | 0.116763937 | 0 | 0.235226842 | 0 | 0 | 0.079628265 |
| TCGA-D7-A6EX | 0.125047988 | 0.015374575 | 0.009480534 | 0.12460885 | 0 | 0.287458094 | 0.000719967 | 0.047187126 | 0.223846353 | 0.020570073 | 0 | 0.045987236 | 0.021805224 | 0.067176193 | 0.138216279 | 0.179086747 | 0.042821304 | 0 | 0.153865258 | 0 | 0 | 0 |
| TCGA-BR-A4J9 | 0.135596177 | 0.13422036 | 0.169170035 | 0.154320561 | 0 | 0.413665778 | 0.032286711 | 0 | 0.152629773 | 0.038799711 | 0 | 0.006393653 | 0.012905078 | 0.073368199 | 0.12620893 | 0.170927329 | 0.002374947 | 0 | 0.029248185 | 0.011628361 | 0.002004077 | 0.003980439 |
| TCGA-VQ-A8PF | 0.1627738 | 0 | 0.391866223 | 0.944932777 | 0 | 0.301199593 | 0.440921778 | 0.163234586 | 0.221863411 | 0 | 0.100946013 | 0 | 0.023383363 | 0.205220666 | 0.406656581 | 0.639540204 | 0.158382919 | 0.045565829 | 0.126373208 | 0 | 0 | 0.009093688 |
| TCGA-IN-A7NR | 0.090241079 | 0.111599079 | 0.057373243 | 0.233627112 | 0 | 0.340281121 | 0.005806481 | 0.044512924 | 0.180216832 | 0 | 0 | 0.107548467 | 0.033473735 | 0.031659636 | 0.094779885 | 0.173144297 | 0.02613723 | 0.056139969 | 0.172600596 | 0 | 0 | 0.004258167 |
| TCGA-F1-6177 | 0.037411282 | 0 | 0.008662022 | 0.070361854 | 0 | 0.472588853 | 0.073296062 | 0.067740923 | 0.084001446 | 0.004803733 | 0.038481493 | 0.017259239 | 0 | 0.427378442 | 0.182521448 | 0.279330532 | 0 | 0 | 0 | 0.207024813 | 0 | 0 |
| TCGA-BR-6801 | 0.078482712 | 0 | 0.003905646 | 0.069560292 | 0 | 0.218257638 | 0.030561387 | 0.028589034 | 0.101666332 | 0 | 0.076711832 | 0 | 0 | 0.33664465 | 0.051818471 | 0.225507912 | 0 | 0.012999722 | 0 | 0.039292032 | 0 | 0 |
| TCGA-CD-8532 | 0.111715118 | 0.042224106 | 0.251464949 | 0.441200814 | 0 | 0.779190179 | 0.047135534 | 0.144899667 | 0.245528645 | 0 | 0 | 0.15359021 | 0 | 0.48133717 | 0.223792396 | 0.271909112 | 0.057933734 | 0.006745381 | 0.17637638 | 0.00837965 | 0 | 0 |
| TCGA-CG-5721 | 0.077457837 | 0 | 0.105107641 | 1.172155467 | 0 | 0 | 0.670124655 | 0.161168623 | 0.177304506 | 0.254691897 | 0.068088613 | 0.102533944 | 0 | 0.561067599 | 0.548793301 | 0.50537207 | 0.174518774 | 0 | 0.021392178 | 0.000759874 | 0 | 0.030412072 |
| TCGA-D7-A748 | 0.070953446 | 0.002501097 | 0.029781031 | 0.07437382 | 0 | 0.552585356 | 0.017553189 | 0.019953644 | 0.139316784 | 0 | 0 | 0.096437427 | 0 | 0.359455261 | 0.120727346 | 0.60941818 | 0.199121268 | 0.021304186 | 0.231242543 | 0 | 0.002412809 | 0.165566216 |
| TCGA-CD-A489 | 0.197525012 | 0.05691936 | 0 | 0.28088609 | 0 | 0.499504734 | 0 | 0.04975905 | 0.113798622 | 0.040156087 | 0 | 0.118984805 | 0.051766644 | 0.011485757 | 0.100880054 | 0.320140362 | 0.05177024 | 0.019705709 | 0.178464007 | 0 | 0 | 0.007743629 |
| TCGA-VQ-A91Z | 0.05583736 | 0 | 0.030035425 | 0.087057337 | 0 | 0.214357583 | 0 | 0.046499834 | 0.177455539 | 0 | 0.149597436 | 0 | 0 | 0.415587032 | 0.030076007 | 0.174734711 | 0 | 0.011494783 | 0 | 0.090982797 | 0.013880892 | 0.012299397 |
| TCGA-CG-5725 | 0.071156323 | 0 | 0.091414632 | 0.320291916 | 0 | 0.088515943 | 0.040413605 | 0.074566323 | 0.058852701 | 0 | 0.000338307 | 0.039527244 | 0.026169273 | 0.236440349 | 0.11582094 | 0.191590847 | 0 | 0 | 0.014510808 | 0.03877917 | 0.006836896 | 0 |
| TCGA-BR-8679 | 0.122151716 | 0 | 0.027203914 | 0.060848094 | 0 | 0.24441666 | 0.02897348 | 0.001623091 | 0.050709802 | 0 | 0.045491287 | 9.18E-05 | 0 | 0.322137315 | 0.172240109 | 0.507129305 | 0 | 0.18031838 | 0.047931089 | 0 | 0 | 0.004972562 |
| TCGA-HU-A4GU | 0.08291311 | 0 | 0 | 0.09886635 | 0 | 0.408630815 | 0.066027795 | 0.044831303 | 0.141160113 | 0 | 0.084298168 | 0.039662227 | 0.004654548 | 0.258590881 | 0.085423237 | 0.194948497 | 0.004110605 | 0 | 0 | 0.073560848 | 0 | 0.010374544 |
| TCGA-BR-8690 | 0.042994529 | 0 | 0.180578355 | 0.457455215 | 0 | 0.18129563 | 0.243072289 | 0.037471793 | 0.203972029 | 0 | 0 | 0.117153739 | 0 | 0.293968364 | 0.155308309 | 0.321349081 | 0.038917229 | 0.00416581 | 0.082281887 | 0 | 0 | 0.01254506 |
| TCGA-BR-8369 | 0.31461201 | 0.030006568 | 0.043907859 | 0.14006386 | 0 | 0.378538698 | 0.028492558 | 0.032853878 | 0.096005108 | 0 | 0.048479176 | 0.001302352 | 0.03216285 | 0.151683935 | 0.101782276 | 0.170848963 | 0.02428271 | 0 | 0.074507024 | 0.019201093 | 0 | 0.004229842 |
| TCGA-BR-8486 | 0.102781845 | 0 | 0.102998691 | 0.003224585 | 0 | 0.576102217 | 0.181460722 | 0.056394405 | 0.181516436 | 0 | 0.182950316 | 0 | 0 | 0.543404162 | 0.089156324 | 0.159433122 | 0.021835867 | 0.015824622 | 0 | 0.09442618 | 0 | 0.006664836 |
| TCGA-VQ-AA6F | 0.22194226 | 0.231169226 | 0.291731671 | 0.19898064 | 0 | 0.431369967 | 0.023929863 | 0.039993067 | 0.176378755 | 0 | 0 | 0.066422043 | 0 | 0.151265236 | 0.210945498 | 0.140645842 | 0 | 0.035397649 | 0.210266085 | 0 | 0 | 0 |
| TCGA-VQ-A8PK | 0.152170244 | 0 | 0.107963787 | 0 | 0 | 0.544491527 | 0.104821001 | 0.042177941 | 0.090503587 | 0.000376626 | 0.175038267 | 0.131459965 | 0.002537576 | 0.191781288 | 0.244234463 | 0.210229517 | 0.007990684 | 0.042606325 | 0.03964409 | 0.025640194 | 0 | 0.009513619 |
| TCGA-SW-A7EB | 0.216236533 | 0.087613015 | 0.033958415 | 0.284945447 | 0 | 0.488858521 | 0.023080278 | 0.120561293 | 0.219672681 | 0 | 0 | 0.057278697 | 0.029642658 | 0.122107137 | 0.078914756 | 0.156847197 | 0.017019771 | 0.058173816 | 0.024466627 | 0.062262896 | 0 | 0 |
| TCGA-CD-A4MG | 0.120786651 | 0.022829833 | 0.002649583 | 0.074048546 | 0 | 0.47052085 | 0 | 0.043207227 | 0.031017876 | 0 | 0.019783579 | 0.033232623 | 0.012271119 | 0.264205074 | 0.108008065 | 0.267066001 | 0.034543058 | 0 | 0 | 0.066909473 | 0.000344906 | 0.02564105 |
| TCGA-CD-8533 | 0.05900294 | 0.021252454 | 0.095392683 | 0.151055923 | 0 | 0.248149727 | 0.182340745 | 0.018338319 | 0.144366383 | 0 | 0.047578432 | 0 | 0.013429085 | 0.176130279 | 0.115625699 | 0.281732323 | 0.081780677 | 0 | 0.161636166 | 0 | 0.013278849 | 0.005361293 |
| TCGA-VQ-AA6J | 0.295090544 | 0.109076648 | 0.038899771 | 0.246003854 | 0 | 0.354358275 | 0.093421858 | 0.22352831 | 0.267099342 | 0 | 0.007630163 | 0.030946516 | 0 | 1.08736974 | 0.344659314 | 0.276096161 | 0 | 0 | 0.122100475 | 0 | 0 | 0.001541671 |
| TCGA-HU-A4GT | 0.046854787 | 0 | 0.038128482 | 0.119599723 | 0 | 0.278174732 | 0.076527604 | 0.073669452 | 0.144303882 | 0 | 0.033199906 | 0.005565708 | 0 | 0.321241622 | 0.097738109 | 0.196791038 | 0.030104586 | 0 | 0 | 0.074360472 | 0.004479312 | 0.014784116 |
| TCGA-D7-6528 | 0.107784875 | 0 | 0.012032898 | 0.046637526 | 0 | 0.319198923 | 0.004905418 | 0.032950622 | 0.102516304 | 0 | 0.05936121 | 0.049593413 | 0 | 0.432843964 | 0.11658616 | 0.134547805 | 0 | 0.00224743 | 0 | 0.206153322 | 0 | 0 |
| TCGA-RD-A8MW | 0.044367044 | 0 | 0.410537279 | 0.178573944 | 0 | 0.409797239 | 0.197962173 | 0.028510967 | 0.132186223 | 0 | 0.045990511 | 0 | 0 | 0.793622989 | 0.181503854 | 0.379329053 | 0.023165232 | 0.00330495 | 0 | 0.065070469 | 0 | 0.039655366 |
| TCGA-VQ-A8DU | 0.065346281 | 0.023436915 | 0.063873517 | 0.152711897 | 0 | 0.337234864 | 0 | 0.052403856 | 0.14597798 | 0 | 0 | 0.103958012 | 0.016548027 | 0.15188533 | 0.115161599 | 0.135370199 | 0.038737495 | 0.009159233 | 0.154969181 | 0 | 0 | 0.011479443 |
| TCGA-BR-4367 | 0.062690549 | 0 | 0.108334365 | 0.31157012 | 0 | 0.472469102 | 0.291259364 | 0 | 0.136463349 | 0.099708657 | 0 | 0.097950023 | 0 | 0.321049337 | 0.281999925 | 0.61960505 | 0.039109658 | 0 | 0.18608182 | 0 | 0 | 0.104289063 |
| TCGA-CG-5720 | 0.136515896 | 0 | 0.157139237 | 0.242374151 | 0 | 0.356584794 | 0.083614338 | 0.001249106 | 0.18354284 | 0 | 0.084842932 | 0 | 0.038038468 | 0.502927383 | 0.150398231 | 0.280457342 | 0 | 0.0329032 | 0.024468886 | 0.241235274 | 0 | 0.155461964 |
| TCGA-CD-8529 | 0.301053511 | 0 | 0.371949162 | 0.311752605 | 0 | 0.508004119 | 0.119975754 | 0.047040518 | 0.270982257 | 0 | 0.107710588 | 0 | 0.011664431 | 0.622156576 | 0.229528357 | 0.475260918 | 0.069609498 | 0 | 0.100175234 | 0 | 0 | 0.011025868 |
| TCGA-R5-A7ZF | 0.036573381 | 0 | 0.158647805 | 0.163856704 | 0 | 0.198788661 | 0.112051968 | 0.062810289 | 0.074060341 | 0 | 0.086648155 | 0.006259136 | 0 | 0.149215857 | 0.17994921 | 0.085396384 | 0.015509035 | 0.024399621 | 0 | 0.081644258 | 0.005078966 | 0.012856621 |
| TCGA-BR-8592 | 0.273743724 | 0.081966721 | 0.223789638 | 0.243106162 | 0 | 0.57393409 | 0.041956186 | 8.76E-05 | 0.120199198 | 0 | 0 | 0.04221457 | 0.0392756 | 0 | 0.076229987 | 0.370563459 | 0.015477404 | 0.000683817 | 0.270488246 | 0 | 0.00025316 | 0.016775716 |
| TCGA-KB-A93H | 0.042488696 | 0 | 0 | 0.074528409 | 0 | 0.480578014 | 0.079989365 | 0.023329551 | 0.077437754 | 0 | 0.049320952 | 0 | 0.010661369 | 0.164656986 | 0.139235709 | 0.129784177 | 0.018139763 | 0.027858236 | 0.00693476 | 0.004144265 | 0.00253401 | 0.001625038 |
| TCGA-BR-6452 | 0.088559729 | 0 | 0.135326451 | 0.286329448 | 0 | 0.333751702 | 0.182670739 | 0.07318606 | 0.314109337 | 0 | 0.160527182 | 0.041233378 | 0 | 0.534760613 | 0.141020332 | 0.372929142 | 0.06400053 | 0.013873517 | 0 | 0.112341645 | 0 | 0.019344424 |
| TCGA-VQ-A91S | 0.159012107 | 0 | 0 | 0.695383401 | 0 | 0.420882131 | 0.341310622 | 0.007009439 | 0.081583791 | 0 | 0.085616026 | 0 | 0.002505908 | 0.281982147 | 0.311220748 | 0.259456003 | 0.043244035 | 0 | 0.024651497 | 0 | 0 | 0.062620624 |
| TCGA-VQ-A8E0 | 0.094681987 | 0 | 0.02925598 | 0.0545631 | 0 | 0.708462641 | 0 | 0.018416194 | 0.150216249 | 0 | 0.035215369 | 0.039424721 | 0.014079643 | 0.358447882 | 0.083608649 | 0.315560938 | 0.047843857 | 0.034563326 | 0 | 0.177020202 | 0 | 0.06499402 |
| TCGA-CG-5724 | 0.029871475 | 0.005581414 | 0.029840664 | 0.202281127 | 0 | 0.214438435 | 0.11151284 | 0.025746282 | 0.138326947 | 0 | 0.049145422 | 0.028285249 | 0.044226403 | 0.390107526 | 0.226020155 | 0.41487128 | 0.00686176 | 0.005655391 | 0 | 0.17414664 | 0 | 0.061136063 |
| TCGA-D7-8574 | 0.107106858 | 1.16484418 | 0.128079594 | 0.581322023 | 0 | 0.359162281 | 0.034263651 | 0.127053612 | 0.439665976 | 0.045977326 | 0 | 0.118521532 | 0.047860899 | 0.235151872 | 0.08603108 | 0.390761215 | 0 | 0.023114186 | 0.15349292 | 0 | 0 | 0.012662495 |
| TCGA-BR-6852 | 0.094999783 | 0 | 0.212015457 | 1.356781526 | 0 | 0 | 0.275608959 | 0.119608263 | 0.392323932 | 0 | 0.163410458 | 0.269954938 | 0.008080886 | 0.6313288 | 0.281828823 | 0.559616638 | 0.013174968 | 0.014479955 | 0.103938347 | 0 | 0 | 0.000353572 |
| TCGA-HU-8608 | 0.100477524 | 0 | 0.786978796 | 0.84537911 | 0 | 0.342216506 | 0.687861927 | 0.159664699 | 0.54267774 | 0 | 0.491015473 | 0 | 0 | 0.329620892 | 0.913667393 | 0.712436408 | 0.009628899 | 0.073849578 | 0 | 0.034729067 | 0 | 0.080455413 |
| TCGA-FP-A9TM | 0.673896175 | 0.740367629 | 0.044030111 | 0.134448916 | 0 | 0.469838715 | 0.042035921 | 0.073362322 | 0.138602128 | 0 | 0.028866516 | 0 | 0 | 0.141828852 | 0.096803675 | 0.142284521 | 0 | 0.010002085 | 0.000676356 | 0.033506237 | 0 | 0.003169034 |
| TCGA-FP-7998 | 0.269237982 | 0 | 0.397677732 | 1.15550909 | 0 | 0.280748293 | 0.617190108 | 0.105489975 | 0.246940164 | 0 | 0.47006709 | 0 | 0 | 0.778200164 | 0.539797686 | 0.595637321 | 0.013143827 | 0 | 0.114597299 | 0 | 0 | 0 |
| TCGA-BR-A4QL | 0.025297121 | 0.005949599 | 0 | 0.095656224 | 0 | 0.267641593 | 0.086179797 | 0.048771628 | 0.072208853 | 0 | 0 | 0.103308908 | 0.003563107 | 0.113413067 | 0.088612962 | 0.110280435 | 0.027848708 | 0 | 0.016132091 | 0 | 0.003296758 | 0 |
| TCGA-D7-A747 | 0.256492668 | 0.121624061 | 0 | 0.273669543 | 0 | 0.439114322 | 0 | 0.062733142 | 0.202472178 | 0 | 0 | 0.141293768 | 0.022510352 | 0.052871904 | 0.12378628 | 0.201346318 | 0.030837085 | 0 | 0.246301104 | 0 | 0 | 0.004713978 |
| TCGA-BR-7196 | 0.131456135 | 0 | 0.439843934 | 0.575740027 | 0 | 0.340762899 | 0.120438937 | 0.062151187 | 0.130630868 | 0 | 0.140167551 | 0 | 0.05451143 | 0.184409409 | 0.319265353 | 0.351077574 | 0.045157151 | 0.013915131 | 0.148027417 | 0 | 0 | 0 |
| TCGA-CG-4441 | 0.059777114 | 0 | 0.074631336 | 0.181118981 | 0 | 0.347524189 | 0.048076913 | 0.035054267 | 0.149377951 | 0 | 0.009854505 | 0.065316008 | 0 | 0.486041589 | 0.160196954 | 0.322088068 | 0 | 0 | 0 | 0.194519807 | 0 | 0.141371975 |
| TCGA-D7-A4YU | 0.275534962 | 0 | 0.546177828 | 0.369059088 | 0 | 0.333728813 | 0.357237339 | 0.092349018 | 0.373274341 | 0 | 0.166226805 | 0 | 0.001926457 | 0.461378672 | 0.515056313 | 0.443034967 | 0.006249436 | 0.021651329 | 0.138811869 | 0 | 0 | 0.008508136 |
| TCGA-BR-4361 | 0.085724159 | 0 | 0.033415558 | 0.283287284 | 0 | 0.406104644 | 0.25880102 | 0.112036293 | 0.103875112 | 0.220699307 | 0 | 0 | 0 | 0.231260038 | 0.302646474 | 0.645847958 | 0.078717742 | 0.019789714 | 0.091091501 | 0.017777442 | 0.033310816 | 0.013546986 |
| TCGA-CG-4475 | 0.111343217 | 0 | 0.039214055 | 0 | 0 | 0.601460507 | 0.007071757 | 0.012922036 | 0.03458184 | 0 | 0.09378564 | 0 | 0.042475149 | 0.440307646 | 0.031053876 | 0.309707195 | 0 | 0.126614877 | 0 | 0.479679925 | 0.079213003 | 0.142473396 |
| TCGA-RD-A7BT | 0.08840107 | 0 | 0.071002357 | 0.115296709 | 0 | 0.528874688 | 0.064664731 | 0.088866477 | 0.096934576 | 0 | 0.007433997 | 0.018427026 | 0.005157086 | 0.107883397 | 0.077434959 | 0.128216085 | 0.072207876 | 0 | 0.069772283 | 0.014862243 | 0 | 0.02256758 |
| TCGA-CD-5800 | 0.305162671 | 0 | 0.019165483 | 0.154090587 | 0 | 0.188351668 | 0.008759913 | 0.091562688 | 0.158537681 | 0 | 0.054692182 | 0 | 0 | 0.711747149 | 0.077426245 | 0.20915313 | 0 | 0.039521656 | 0 | 0.055976008 | 0 | 0 |
| TCGA-VQ-A8PD | 0.198354178 | 0.324582396 | 0.316789435 | 0.431403629 | 0 | 0.944778231 | 0.128237218 | 0 | 0.149871205 | 0 | 0.165847712 | 0 | 0.017041817 | 0.205438459 | 0.190917583 | 0.170531821 | 0.104748822 | 0.041000839 | 0.08175471 | 0.010074409 | 0 | 0.053522741 |
| TCGA-CG-4476 | 0.107558342 | 0.04422277 | 0.028495065 | 0.172583193 | 0 | 0.680475728 | 0.089079667 | 0 | 0.089946345 | 0.085560802 | 0.018654378 | 0 | 0.005130802 | 0.179890343 | 0.088084492 | 0.547249148 | 0.103545994 | 0.029131196 | 0.406907865 | 0.017980785 | 0.027965942 | 0.045196116 |
| TCGA-VQ-A91V | 0.116897445 | 0 | 0.034169468 | 0.069055756 | 0 | 0.46813243 | 0.002486536 | 0.030131226 | 0.076092722 | 0 | 0.130339094 | 0 | 0.030888985 | 0.070068677 | 0.065473905 | 0.134986322 | 0.015316914 | 0.039634825 | 0 | 0.079074438 | 0 | 0.02188033 |
| TCGA-HU-A4GX | 0.038782712 | 0.001526843 | 0.234788477 | 0.673925943 | 0 | 0 | 0.304463213 | 0.072417439 | 0.126803282 | 0.023572047 | 0 | 0.047367055 | 0.003451485 | 0.009942117 | 0.270214495 | 0.192524666 | 0.029655767 | 0.00274901 | 0.06033271 | 0.009467323 | 0 | 0.009892014 |
| TCGA-BR-8682 | 0.110482416 | 0.044730055 | 0.012041504 | 0.14658753 | 0 | 0.346324989 | 0 | 0.017870419 | 0.191379056 | 0 | 0.004828885 | 0.054523004 | 0 | 0.699022636 | 0.068452611 | 0.374353093 | 0.101942313 | 0 | 0.315637833 | 0 | 0 | 0 |
| TCGA-BR-6563 | 0.288349829 | 0.007654393 | 0.303085421 | 0.660381845 | 0 | 0.336290646 | 0.047449803 | 0 | 0.257677898 | 0 | 0 | 0.037655885 | 0.033526146 | 0.256973869 | 0.154866059 | 0.335339915 | 0.035815261 | 0 | 0.317672957 | 0 | 0 | 0 |
| TCGA-HU-A4GJ | 0.786658534 | 0.799366067 | 0.486569077 | 0.662122548 | 0 | 0.799466493 | 0.072944128 | 0.432580382 | 0.315618411 | 0.056562505 | 0 | 0 | 0 | 0.240249381 | 0.097335522 | 0.283040341 | 0 | 0.122474294 | 0.043246544 | 0.05605972 | 0 | 0 |
| TCGA-ZA-A8F6 | 0.025363792 | 0.049878435 | 0 | 0.059355355 | 0 | 0.341024071 | 0 | 0.015620708 | 0.126616161 | 0.009548569 | 0.016830677 | 0 | 0 | 1.073485719 | 0.059430275 | 0.42556053 | 0.011179359 | 0 | 0.245466265 | 0.007784704 | 0 | 0 |
| TCGA-FP-8631 | 0.128670436 | 0 | 0.155174486 | 0.049652841 | 0 | 0.285939503 | 0.043563301 | 0.027606087 | 0.056994087 | 0 | 0.013087037 | 0.025730008 | 0.001820279 | 0.241763687 | 0.043586948 | 0.152175124 | 0.010822099 | 0.144217641 | 0.178083503 | 0 | 0 | 0.009010819 |
| TCGA-VQ-A8PQ | 1.080115043 | 0.894708267 | 0.03071895 | 0.691570249 | 0.613614325 | 1.070852695 | 0.128843096 | 0 | 0.521355975 | 0 | 0.106999615 | 0 | 0.029863262 | 0.389108111 | 0.245664139 | 0.3075129 | 0 | 0.075222944 | 0.127309609 | 0 | 0 | 0 |
| TCGA-BR-7901 | 0.090283669 | 0 | 0.0730619 | 0.233640874 | 0 | 0.33766964 | 0.011918474 | 0.016982398 | 0.238324899 | 0 | 0.020426196 | 0.035154444 | 0.023835329 | 0.759467817 | 0.282033112 | 0.309282229 | 0.058472255 | 0.048563478 | 0 | 0.099482959 | 0 | 0.027160545 |
| TCGA-HU-A4H4 | 0.04629829 | 0.091656785 | 0.154033604 | 0.358863916 | 0 | 0.147802161 | 0.264511633 | 0.172682799 | 0.227718361 | 0.012759123 | 0 | 0.044901889 | 0 | 0.427437966 | 0.333541655 | 0.209435888 | 0.00088694 | 0.12700904 | 0.088648867 | 0 | 0 | 0.039482872 |
| TCGA-IN-A6RS | 0.076695251 | 0 | 0.119053679 | 0.252217859 | 0 | 0.187709285 | 0.187699846 | 0.038593301 | 0.184657787 | 0.043175523 | 0.080171354 | 0 | 0 | 0.399061721 | 0.108134921 | 0.148527885 | 0.002246303 | 0.014449642 | 0 | 0.150091359 | 0 | 0.040614495 |
| TCGA-BR-6453 | 0.394380495 | 0.488636623 | 0.122713959 | 0.630437131 | 0 | 0.437536753 | 0.056813703 | 0.099848118 | 0.453069671 | 0 | 0 | 0.120000937 | 0 | 0.313181078 | 0.070637912 | 0.477293755 | 0.06344557 | 0.098593828 | 0.228662994 | 0 | 0 | 0.016351934 |
| TCGA-D7-A6F2 | 0.056792245 | 0 | 0.094877083 | 0.212562512 | 0 | 0.485676631 | 0.024788015 | 0.023170072 | 0.181934601 | 0 | 0.026339982 | 0.085634694 | 0.01105615 | 0.412003765 | 0.104235915 | 0.246376429 | 0.030421788 | 0 | 0.118237941 | 0 | 0.006281002 | 0.007084194 |
| TCGA-VQ-A8PP | 0.261031297 | 0 | 0.047157701 | 0.353584132 | 0 | 0.254459718 | 0.282273733 | 0.167490688 | 0.171974803 | 0 | 0.138421501 | 0 | 0 | 0.242980133 | 0.230873441 | 0.290121857 | 0.02835469 | 0 | 0.050922438 | 0.015773865 | 0 | 0.015945471 |
| TCGA-VQ-A8DZ | 0.073984782 | 0 | 0.126008945 | 0.159962584 | 0 | 0.263493942 | 0.045725226 | 0.008303382 | 0.121179811 | 0 | 0.036413666 | 0.040947594 | 0.01021851 | 0.320599163 | 0.117374904 | 0.233063443 | 0.041241399 | 0.007023715 | 0.170191074 | 0 | 0 | 0.075852943 |
| TCGA-IN-8462 | 0.027784763 | 0.05185336 | 0.056175059 | 0.100016495 | 0 | 0.293263777 | 0.025108366 | 0.01601631 | 0.143344092 | 0 | 0.006133308 | 0.042873393 | 0.01796922 | 0.118801885 | 0.171767738 | 0.14097493 | 0.090470371 | 0.005573468 | 0.197821449 | 0 | 0 | 0.011912161 |
| TCGA-BR-8380 | 0.174343291 | 0 | 0.090124985 | 0.205136436 | 0 | 0.3489189 | 0.026305591 | 0.087436556 | 0.091738987 | 0 | 0 | 0.022319107 | 0.062984528 | 0.204206303 | 0.110997745 | 0.317336664 | 0.035348686 | 0.008397168 | 0.159121695 | 0.00151987 | 0.001403864 | 0 |
| TCGA-BR-8484 | 0.157626453 | 0 | 0.18890942 | 0.33718254 | 0 | 0.663184028 | 0.08928941 | 0.036568646 | 0.225338206 | 0.026324406 | 0 | 0.100263981 | 0 | 0.493922127 | 0.281058915 | 0.430675042 | 0.123799147 | 0 | 0.209489551 | 0 | 0 | 0 |
| TCGA-HU-A4H8 | 0.023587652 | 0 | 0.02240569 | 0.131978111 | 0 | 0.286764861 | 0.099503304 | 0.04008771 | 0.13458165 | 0 | 0.069233462 | 0 | 0.008841092 | 0.128610466 | 0.100888675 | 0.19649734 | 0.019589326 | 0.035917733 | 0.067510374 | 0.00929117 | 0 | 0.006440887 |
| TCGA-CG-5722 | 0.255184113 | 0.044096746 | 0.258258139 | 1.076663551 | 0 | 0.497173464 | 0.016646316 | 0.226335522 | 0.379795543 | 0 | 0 | 0.238509928 | 0.036295703 | 0.16842144 | 0.237930708 | 0.25038954 | 0.085926931 | 0.109892804 | 0.159181112 | 0 | 0.02157126 | 0 |
| TCGA-HF-A5NB | 0.035582633 | 0 | 0 | 0.272197818 | 0 | 0.403422964 | 0.09351537 | 0.097018449 | 0.100204941 | 0.003705374 | 0 | 0.048411104 | 0.005690908 | 0.149540466 | 0.079321007 | 0.217860625 | 0.085711411 | 0 | 0 | 0.114358362 | 0.001565469 | 0.001625442 |
| TCGA-BR-8060 | 0.114131643 | 0 | 0.405225473 | 0.190015933 | 0 | 0.408120761 | 0.101924093 | 0.145577303 | 0.060763936 | 0 | 0 | 0.142912608 | 0.016315918 | 0.480584977 | 0.194832612 | 0.322533492 | 0.054659547 | 0.031736171 | 0 | 0.215425028 | 0.032462008 | 0.041221529 |
| TCGA-CG-5734 | 0.093991984 | 0 | 0.355637145 | 0.147212182 | 0 | 0.41794046 | 0.043088104 | 0.078506827 | 0.180552177 | 0 | 0.069327913 | 0.041800502 | 0 | 0.636694629 | 0.173291149 | 0.190035333 | 0.05887762 | 0 | 0 | 0.135141546 | 0 | 0.06412335 |
| TCGA-BR-8384 | 0.143694456 | 0 | 0.042537661 | 0.472171065 | 0 | 0.594510559 | 0.019596161 | 0.034003197 | 0.116157198 | 0.030190592 | 0 | 0.072594138 | 0.048376715 | 0 | 0.164148181 | 0.426883695 | 0.116009701 | 0.058181431 | 0.331207162 | 0 | 0 | 0 |
| TCGA-FP-7735 | 0.106403714 | 0.029123461 | 0.106737456 | 0.220822158 | 0 | 0.233002696 | 0.034600062 | 0.03397798 | 0.229346492 | 0 | 0 | 0.041135512 | 0.023629809 | 0.297563456 | 0.147491835 | 0.181039332 | 0.011780113 | 0 | 0.073989469 | 0 | 0 | 0 |
| TCGA-FP-7829 | 0.100422466 | 0 | 0.020490792 | 0.036270362 | 0 | 0.32078701 | 0.015982477 | 0.028862773 | 0.098308821 | 0 | 0.090240086 | 0 | 0.015619674 | 0.751552069 | 0.053851215 | 0.318706062 | 0.044235949 | 0.005182105 | 0.004621149 | 0.072338153 | 0 | 0.036488717 |
| TCGA-IN-AB1V | 0.086470675 | 0.138497019 | 0.071570171 | 0.166294797 | 0 | 0.367046749 | 0 | 0.057208203 | 0.138937417 | 0 | 0.013315496 | 0.0598669 | 0.041060366 | 0.081280749 | 0.051366943 | 0.107851599 | 0.012737536 | 0.045874415 | 0.080759063 | 0 | 0 | 0.01011971 |
| TCGA-CD-5813 | 0.240747934 | 0 | 0.191025294 | 0.496971706 | 0 | 0.238603292 | 0.021726613 | 0.180326561 | 0.376253897 | 0.110275047 | 0 | 0.167724237 | 0.085277425 | 0.183805294 | 0.254880033 | 0.47791015 | 0.225425798 | 0 | 0.066575018 | 0.042627472 | 0.002482374 | 0.001524329 |
| TCGA-FP-8210 | 0.53781859 | 0.286635674 | 0.144301724 | 0.672293678 | 0 | 0.35955526 | 0.045567655 | 0.179130758 | 0.395535735 | 0 | 0 | 0.12439036 | 0.053300306 | 0.270454755 | 0.187322757 | 0.319633375 | 0.131453348 | 0.039891614 | 0.432587294 | 0 | 0 | 0.014459508 |
| TCGA-BR-6566 | 0.03901515 | 0.019971536 | 0.123142013 | 0.152026114 | 0 | 0.472350895 | 0.073887909 | 0.043730988 | 0.148001256 | 0 | 0 | 0.17841471 | 0.004645725 | 0.343667233 | 0.173181775 | 0.304673508 | 0.069236891 | 0 | 0.00331438 | 0.031285675 | 0 | 0.02295176 |
| TCGA-CG-4466 | 0.095041748 | 0 | 0.011796815 | 0 | 0 | 0.394352356 | 0.177638178 | 0.003081531 | 0.018448678 | 0.000691272 | 0.1492323 | 0 | 0 | 0.170235752 | 0.143428353 | 0.142692371 | 0.007231048 | 0.023675741 | 0 | 0.0468055 | 0 | 0.073269059 |
| TCGA-VQ-A94O | 0.104760307 | 0 | 0.023887291 | 0.138176433 | 0 | 0.606520873 | 0.08801806 | 0.047384551 | 0.237988671 | 0 | 0.169669151 | 0 | 0 | 0.366170157 | 0.06868316 | 0.141825636 | 0 | 0.008221465 | 0 | 0.143364185 | 0 | 0 |
| TCGA-BR-8059 | 0.041252382 | 0 | 0.205831519 | 0.091452798 | 0 | 0.289726589 | 0.040976843 | 0.012251002 | 0.114127432 | 0 | 0.063735229 | 0.020397828 | 0.007855139 | 0.259220039 | 0.117431617 | 0.195014169 | 0.014436834 | 0.004046591 | 0 | 0.069785994 | 0.001356636 | 0.0045801 |
| TCGA-D7-A6F0 | 0.097564058 | 0 | 0.235000745 | 0.239890224 | 0 | 0.320726393 | 0.150410118 | 0.071353676 | 0.180115659 | 0 | 0.022794474 | 0.055894562 | 0 | 0.481496876 | 0.248571308 | 0.439603722 | 0.046782393 | 0 | 0.029909315 | 0 | 0 | 0 |
| TCGA-BR-A4PF | 0.115821392 | 0 | 0.03936393 | 0.152763301 | 0 | 0.392821429 | 0.152721675 | 0.120253534 | 0.199829826 | 0.041314362 | 0 | 0.041213907 | 0 | 0.399033732 | 0.300883372 | 0.524892307 | 0.016422657 | 0 | 0.067271603 | 0 | 0.012006787 | 0.168555393 |
| TCGA-BR-A44T | 1.109128409 | 0.637379825 | 0.015657937 | 0.340834842 | 0.015312409 | 0.622212529 | 0.059622379 | 0.130523308 | 0.308624483 | 0.059595925 | 0 | 0.102357232 | 0.001753363 | 0.25517811 | 0.149466371 | 0.239390068 | 0 | 0.014108948 | 0.075344188 | 0 | 0 | 0 |
| TCGA-VQ-A8PH | 0.069716372 | 0.036504931 | 0.136561427 | 0.194365631 | 0 | 0.469606127 | 0.02300447 | 0.186020211 | 0.146118294 | 0 | 0 | 0.067796463 | 0.007968683 | 0.110866605 | 0.076866165 | 0.084027973 | 0.031006548 | 0.005684515 | 0.040416179 | 0.043569728 | 0 | 0 |
| TCGA-BR-8591 | 0.092605865 | 0 | 0.200447484 | 0.142105436 | 0 | 0.368544234 | 0.085674056 | 0.118932186 | 0.193739109 | 0.024771827 | 0 | 0.136906532 | 0 | 0.44406538 | 0.321533579 | 0.297254572 | 0.004097401 | 0 | 0.061963548 | 0.037811846 | 0 | 0.038052726 |
| TCGA-HU-A4G3 | 0.022706635 | 0.027161111 | 0.024691762 | 0.051524298 | 0 | 0.279710723 | 0 | 0.01636854 | 0.058353988 | 0 | 0 | 0.085594758 | 0 | 0.111332909 | 0.03905366 | 0.153927145 | 0.016455552 | 0.006594425 | 0.314017219 | 0.002237258 | 0 | 0.021121221 |
| TCGA-VQ-A91E | 0.180921417 | 0 | 0.358251145 | 0.330391648 | 0 | 0.481172362 | 0.117293352 | 0.083345391 | 0.066086003 | 0 | 0.055064145 | 0.027162258 | 0.027236468 | 0.091339251 | 0.078214425 | 0.118628958 | 0.000815867 | 0.023484149 | 0.006370896 | 0.048317889 | 0 | 0.025119566 |
| TCGA-RD-A7C1 | 0.038150697 | 0 | 0.120069791 | 0.393137245 | 0 | 0.302018058 | 0.270987271 | 0.050143541 | 0.076783347 | 0.055353224 | 0.04159585 | 0.024625344 | 0 | 0.233270938 | 0.215183209 | 0.343128211 | 0.088819433 | 0.025740352 | 0 | 0.30457894 | 0 | 0.133032546 |
| TCGA-CD-A486 | 0.051771374 | 0 | 0.132317661 | 0.075930135 | 0 | 0.248102851 | 0.010987853 | 0.030541857 | 0.109297158 | 0 | 0.024666037 | 0.022278968 | 0 | 0.671138392 | 0.089294037 | 0.3186717 | 0 | 0.005987756 | 0 | 0.033730756 | 0.002875888 | 0.00250799 |
| TCGA-CG-4465 | 0.133612295 | 0 | 0.025252202 | 0.089860257 | 0 | 0.361077158 | 0.105237055 | 0.072506904 | 0.149690208 | 0.032013473 | 0.000551285 | 0.06598865 | 0 | 0.211195156 | 0.309604547 | 0.857405893 | 0.039953113 | 0 | 0 | 0.09291368 | 0 | 0.158561663 |
| TCGA-D7-A74A | 0.021711842 | 0.009549659 | 0.062225565 | 0.176340605 | 0 | 0.329338418 | 0.043047976 | 0.056219973 | 0.159212366 | 0.00287587 | 0 | 0.064817418 | 0.009169309 | 0.035614997 | 0.102456949 | 0.127642497 | 0.08769205 | 0.024115197 | 0.035553952 | 0.010552711 | 0 | 0.001954977 |
| TCGA-D7-6522 | 0.290449348 | 0.217146226 | 0.271597839 | 0.902954749 | 0 | 0.312337509 | 0.127776903 | 0.213877042 | 0.519850721 | 0 | 0 | 0.103822105 | 0.038299522 | 0.675260853 | 0.294783602 | 0.820928083 | 0.111135684 | 0 | 0.357031728 | 0 | 0 | 0 |
| TCGA-RD-A8N2 | 0.141812015 | 0 | 0 | 0.239727927 | 0 | 0.346546072 | 0.02150604 | 0.0190714 | 0.100248136 | 0 | 0 | 0.048836929 | 0.038678754 | 0.0015183 | 0.078924922 | 0.349326226 | 0.05213074 | 0.041545422 | 0.170715814 | 0 | 0 | 0.000267931 |
| TCGA-HU-A4H6 | 0.201165265 | 0.019493477 | 0.273661353 | 0.090167935 | 0 | 0.260319939 | 0.038359909 | 0.063993315 | 0.128684857 | 0 | 0 | 0.048435287 | 0 | 0.141256434 | 0.094992499 | 0.105080465 | 0.020890331 | 0.030327857 | 0.08070454 | 0.050129424 | 0 | 0.0848487 |
| TCGA-CD-8535 | 0.156642127 | 0 | 0.042253426 | 0.089947303 | 0 | 0.1326702 | 0.026442041 | 0.058500826 | 0.178641862 | 0 | 0.074842036 | 0 | 0 | 0.588144495 | 0.112033657 | 0.192900068 | 0.007833143 | 0 | 0.038835803 | 0 | 0.003338505 | 0.003496759 |
| TCGA-BR-8361 | 0.070977 | 0 | 0.044429461 | 0.489396801 | 0 | 0.147281948 | 0.159117879 | 0.153829722 | 0.255819851 | 0.078794021 | 0 | 0.093333491 | 0 | 0.130510213 | 0.156001048 | 0.227625908 | 0.012863528 | 0.128873978 | 0.009320457 | 0.01352523 | 0.029755364 | 0.040859488 |
| TCGA-IN-A6RL | 0.076720721 | 0.019890653 | 0.145740142 | 0.094752281 | 0 | 0.326969121 | 0.015912505 | 0.030725371 | 0.138303718 | 0 | 0.012790748 | 0.027101019 | 0.01626954 | 0.120527639 | 0.158160122 | 0.239041798 | 0.032276829 | 0.004881012 | 0.130591109 | 0 | 0 | 0.02551113 |
| TCGA-VQ-AA6K | 0.08287441 | 0 | 0.202821704 | 0.313223262 | 0 | 0.348846654 | 0.131126938 | 0.05465885 | 0.070257666 | 0 | 0.012109356 | 0.071762134 | 0.005028378 | 0.174434174 | 0.120962074 | 0.164907911 | 0.025802391 | 0.016395698 | 0.137078092 | 0.011023334 | 0 | 0.002054208 |
| TCGA-BR-4267 | 0.053798559 | 0.00428665 | 0.077316757 | 0.091862215 | 0 | 0.651748758 | 0.025459971 | 0 | 0.071676084 | 0 | 0.062233536 | 0 | 0 | 0.34153748 | 0.095480644 | 0.340172663 | 0.029845491 | 0.041367609 | 0 | 0.274893728 | 0 | 0.16442207 |
| TCGA-BR-7957 | 0.194452325 | 0 | 0.016818532 | 0.101228331 | 0 | 0.494641601 | 0.032949023 | 0.068904808 | 0.134639519 | 0 | 0.044546749 | 0.0175195 | 0.001172421 | 0.276469012 | 0.119854998 | 0.321557869 | 0.017724656 | 0.015598264 | 0.361206778 | 0 | 0 | 0.059655717 |
| TCGA-BR-8683 | 0.265941598 | 0 | 0 | 0.305827607 | 0 | 0.488589391 | 0.087040699 | 0.129746392 | 0.23842547 | 0 | 0.031109258 | 0.012348644 | 0.007004276 | 0.323098468 | 0.219067668 | 0.253841863 | 0.122827825 | 0.044047055 | 0.136302238 | 0 | 0 | 0 |
| TCGA-VQ-AA68 | 0.304931094 | 0 | 0.046528436 | 0.131933996 | 0 | 0.370123414 | 0.075101948 | 0.095545407 | 0.262685361 | 0 | 0 | 0.069445759 | 0 | 0.219093353 | 0.153130827 | 0.207271609 | 0.029293182 | 0.044701962 | 0.258571555 | 0 | 0 | 0 |
| TCGA-D7-A4Z0 | 0.230344107 | 0.076281985 | 0.030996169 | 0.102198713 | 0 | 0.475669923 | 0.01901415 | 0.026378259 | 0.174764856 | 0 | 0.022028183 | 0.040356987 | 0.053175854 | 0.197539499 | 0.070586125 | 0.129346377 | 0.12693934 | 0.107791659 | 0.245383567 | 0 | 0 | 0.05242976 |
| TCGA-VQ-A91X | 0.070478712 | 0.004410007 | 0.122657353 | 0.073944944 | 0 | 0.232959128 | 0.054104239 | 0.048984805 | 0.078552405 | 0 | 0.065382412 | 0 | 0 | 0.116053961 | 0.047416369 | 0.08676708 | 0.046961584 | 0.013073096 | 0 | 0.068817411 | 0 | 0 |
| TCGA-RD-A7BW | 0.14251147 | 0 | 0.018652941 | 0.869117845 | 0 | 0.436230072 | 0.014861472 | 0.122557 | 0.096332902 | 0.152932875 | 0 | 0.286910946 | 0.120485589 | 0 | 0.227265319 | 0.368007374 | 0.075095656 | 0 | 0.158332005 | 0 | 0 | 0 |
| TCGA-BR-A4J4 | 0.186272209 | 0 | 0.013516316 | 0.18195534 | 0 | 0.4863278 | 0.060278543 | 0.000278624 | 0.245204085 | 0 | 0.046248011 | 0.015300422 | 0.023337429 | 0.10559206 | 0.24235483 | 0.219233182 | 0.283202717 | 0 | 0 | 0.072718283 | 0 | 0.016203428 |
| TCGA-HF-7131 | 0.126984192 | 0 | 0.102164205 | 0.270739062 | 0 | 0.638646408 | 0.073891928 | 0 | 0.107852825 | 0 | 0.12660739 | 0 | 0.034705308 | 0.270840376 | 0.103673449 | 0.186973155 | 0.006447591 | 0.031993913 | 0.045569261 | 0.056389336 | 0 | 0.096865471 |
| TCGA-VQ-A8PB | 0.093064241 | 0 | 0.0685856 | 0.130579475 | 0 | 0.349877568 | 0.039172235 | 0.056632781 | 0.056846289 | 0 | 0.035328879 | 0.033397632 | 0 | 0.397083726 | 0.063424452 | 0.138811132 | 0 | 0.01143522 | 0 | 0.230507787 | 0.001665146 | 0.023248436 |
| TCGA-KB-A6F7 | 0.125875412 | 0 | 0.128714364 | 0.615508682 | 0 | 0.094187402 | 0.356659458 | 0.097051803 | 0.193436247 | 0 | 0.046241779 | 0.095619829 | 0 | 0.374348333 | 0.138595368 | 0.431391557 | 0.098849964 | 0.023530308 | 0.012231823 | 0.039750924 | 0 | 0.023652063 |
| TCGA-VQ-A8PX | 0.091416428 | 0 | 0.266418618 | 0.284931112 | 0 | 0.578909003 | 0.066357128 | 0.010812525 | 0.163017572 | 0 | 0 | 0.031911634 | 0.031778734 | 0.026782265 | 0.10437806 | 0.076677552 | 0.030995926 | 0.03005045 | 0.001969901 | 0.029304609 | 0 | 0.042006605 |
| TCGA-VQ-A8E7 | 0.051641673 | 0 | 0.038477109 | 0.076905491 | 0 | 0.379416402 | 0.070187996 | 0.022103116 | 0.026450247 | 0 | 0.106527249 | 0 | 0.006985484 | 0.221429223 | 0.111453328 | 0.179909551 | 0.018358035 | 0.009924378 | 0.106450152 | 0.02002933 | 0 | 0.020040231 |
| TCGA-VQ-A91A | 0.116047111 | 0 | 0.07219482 | 0.023522695 | 0 | 0.460193066 | 0 | 0 | 0.054841803 | 0 | 0.176190649 | 0 | 0.044160478 | 0.687682987 | 0.032486051 | 0.340926359 | 0 | 0.168446779 | 0 | 0.371167928 | 0.008463325 | 0.129025047 |
| TCGA-KB-A93G | 0.16866216 | 0 | 0.01857969 | 0.008798761 | 0 | 0.580286816 | 0 | 0 | 0.084551993 | 0 | 0.258963881 | 0 | 0 | 0.978794057 | 0.075960628 | 0.334835899 | 0 | 0.132666812 | 0 | 0.842585397 | 0 | 0.404001528 |
| TCGA-HU-A4HD | 0.075446334 | 0 | 0.054854456 | 0.099996287 | 0 | 0.33552531 | 0.028996388 | 0.003026629 | 0.125883166 | 0 | 0 | 0.018247581 | 0 | 0.320592193 | 0.061728887 | 0.199181045 | 0.014851502 | 0.001420208 | 0.05889448 | 0.064879849 | 0 | 0.012759719 |
| TCGA-HU-8604 | 0.05366571 | 0 | 0.417400555 | 0.558312664 | 0 | 0.104378361 | 0.466639298 | 0.13793596 | 0.168025626 | 0 | 0.248519683 | 0 | 0 | 0.793277042 | 0.244935881 | 0.298550856 | 0.043578563 | 0 | 0 | 0.106618139 | 0 | 0.044632787 |
| TCGA-CG-4442 | 0.047876156 | 0 | 0.028388286 | 0.081934703 | 0 | 0.295135666 | 0.229074877 | 0.006809608 | 0.031392646 | 0 | 0.120649567 | 0 | 0 | 0.183492739 | 0.159667584 | 0.252392075 | 0.010798136 | 0 | 0 | 0.078223109 | 0.020140859 | 0.12234769 |
| TCGA-CG-4462 | 0.16610686 | 0 | 0.062001347 | 0.111333297 | 0 | 0.807877746 | 0.075441094 | 0 | 0.049085172 | 0 | 0.118121688 | 0 | 0.180335522 | 0.351796141 | 0.121543547 | 0.953955312 | 0.138269076 | 0.122677566 | 0 | 0.277673431 | 0.071632101 | 0.743275838 |
| TCGA-BR-7707 | 0.057324075 | 0 | 0.040973138 | 0.286763936 | 0 | 0.345285581 | 0.218292588 | 0.152004092 | 0 | 0 | 0.124926537 | 0.031920411 | 0 | 0.343091619 | 0.232352468 | 0.214052389 | 0.028621623 | 0.008058254 | 0 | 0.175916643 | 0.015856966 | 0.027604835 |
| TCGA-CD-8525 | 0.15922198 | 0 | 0.25404677 | 0.384238001 | 0 | 0.164434776 | 0.0850097 | 0.104187766 | 0.223341694 | 0 | 0.06305806 | 0.011018989 | 0 | 0.345716638 | 0.228896749 | 0.197948614 | 0 | 0.008283774 | 0.040381626 | 0.019301631 | 0 | 0.025068169 |
| TCGA-D7-6519 | 0.08387964 | 0 | 0.009813572 | 0.291965077 | 0 | 0.221213996 | 0.004218404 | 0.063924855 | 0.189580325 | 0 | 0.016541085 | 0.138689676 | 0.040413865 | 0.067957423 | 0.070375016 | 0.238716599 | 0.029967982 | 0.01039219 | 0.187638533 | 0 | 0 | 0.003059961 |
| TCGA-BR-6457 | 0.163645304 | 0.060621264 | 0.218418802 | 0.327592968 | 0 | 0.436124074 | 0.017526619 | 0.058207768 | 0.188715753 | 0 | 0 | 0.15144428 | 0.045060131 | 0.122585979 | 0.192894125 | 0.213354158 | 0.043548958 | 0 | 0.199218146 | 0 | 0 | 0 |
| TCGA-IN-A6RR | 0.097054626 | 0 | 0.169326856 | 0.215078027 | 0 | 0.270094271 | 0.040763724 | 0.043154515 | 0.085990005 | 0.033998222 | 0.02292386 | 0 | 0.004871332 | 0.054273624 | 0.095356866 | 0.182979418 | 0.023720694 | 0.010424066 | 0.096238187 | 0.012749728 | 0 | 0.007439232 |
| TCGA-HU-A4H3 | 0.097028486 | 0 | 0 | 0.310437171 | 0 | 0.199732972 | 0.212777686 | 0.110361449 | 0.058023678 | 0 | 0.078351022 | 0.086628274 | 0.025820982 | 0.108913577 | 0.124717115 | 0.13145895 | 0.016267301 | 0.005103808 | 0 | 0.190363864 | 0 | 0.020418095 |
| TCGA-VQ-A927 | 0.043356022 | 0 | 0.320749725 | 0.091881408 | 0 | 0.426315259 | 0.031899169 | 0 | 0.113031584 | 0 | 0.092732095 | 0 | 0.018839952 | 0.08520372 | 0.069978728 | 0.164895424 | 0.007651388 | 0.019107356 | 0.057792774 | 0.009389355 | 0.007001072 | 0.019681484 |
| TCGA-BR-A44U | 0.037188627 | 0.015294606 | 0.000317198 | 0.039555784 | 0 | 0.227544335 | 0 | 0.005794431 | 0.091034749 | 0 | 0 | 0.079684723 | 0.011317368 | 0.119188334 | 0.097540046 | 0.106149764 | 0.073740961 | 0 | 0.082550891 | 0 | 0 | 0.000532287 |
| TCGA-BR-7717 | 0.178385469 | 0 | 0 | 0.222515034 | 0 | 0.146930989 | 0.029821411 | 0.03442575 | 0.159350409 | 0 | 0.00240931 | 0.021389746 | 0.029519487 | 0.221420747 | 0.091365982 | 0.148118354 | 0.000204598 | 0 | 0.054226828 | 0.017847581 | 0.00085764 | 0.006240941 |
| TCGA-BR-4256 | 0.391524191 | 0 | 0.353739606 | 1.187530233 | 0 | 2.38108817 | 1.144410305 | 0.293334873 | 0.034559764 | 0.026270194 | 0.550984588 | 0 | 1.207743903 | 1.250736531 | 1.065675643 | 2.164448446 | 0 | 0.476129576 | 1.054901949 | 0.417751004 | 0 | 0.91039335 |
| TCGA-ZQ-A9CR | 0.058549354 | 0 | 0.192642142 | 0.198343281 | 0 | 0.512361772 | 0.216127367 | 0 | 0.02342061 | 0.092585268 | 0.072712427 | 0 | 0 | 0.23342265 | 0.177245258 | 0.205828811 | 0.006544185 | 0.064153233 | 0 | 0.199540907 | 0 | 0.034498392 |
| TCGA-BR-8485 | 0.15298913 | 0 | 0.227982213 | 0.526005703 | 0 | 0.450909492 | 0.150787111 | 0.012350674 | 0.116727686 | 0 | 0.044310926 | 0.044864717 | 0.031934721 | 0.287965125 | 0.121494727 | 0.187518138 | 0.058246468 | 0 | 0.073270117 | 0 | 0 | 0 |
| TCGA-RD-A8MV | 0.19640673 | 0.012463206 | 0.207661266 | 0.271968782 | 0 | 0.472014658 | 0.193905253 | 0.096093561 | 0.234990535 | 0 | 0.113764789 | 0 | 0.059801334 | 0.211805572 | 0.237108778 | 0.210766833 | 0.066244748 | 0.091665061 | 0.06907609 | 0.043605069 | 0 | 0.148017739 |
| TCGA-VQ-A91N | 0.127695951 | 0 | 0.203967633 | 0.207577789 | 0 | 0.431005569 | 0.0500551 | 0.058243392 | 0.134338128 | 0 | 0.043230201 | 0.022556436 | 0 | 0.132509583 | 0.099019018 | 0.11317199 | 0.05395903 | 0.025790943 | 0.099827171 | 0 | 0.007753442 | 0 |
| TCGA-D7-8578 | 0.149159073 | 0 | 0.109430936 | 0.248925463 | 0 | 0.370133028 | 0.010413472 | 0.064620958 | 0.14843713 | 0 | 0 | 0.123012466 | 0.025495211 | 0.126703327 | 0.084710715 | 0.308784635 | 0.014778158 | 0.030443478 | 0.1665864 | 0.007123601 | 0 | 0.016592583 |
| TCGA-FP-7916 | 0.111216406 | 0.001850256 | 0.529891666 | 0.700085894 | 0 | 0.27164632 | 0.306460649 | 0.067997298 | 0.291073281 | 0 | 0.085115417 | 0.016019929 | 0.006012575 | 0.238143195 | 0.488104324 | 0.49414348 | 0.023531676 | 0.046591991 | 0.274834083 | 0 | 0 | 0 |
| TCGA-VQ-A8P5 | 0.154385516 | 0 | 0.083741067 | 0.170085133 | 0 | 0.198207731 | 0.243608615 | 0.044888206 | 0.074326296 | 0 | 0.162616901 | 0 | 0 | 0.258323322 | 0.200063032 | 0.258125793 | 0.014890377 | 0.024209973 | 0.073044889 | 0 | 0 | 0.061374887 |
| TCGA-CD-8526 | 0.19096194 | 0 | 0.263303205 | 0.229619487 | 0 | 0.404493213 | 0.169407556 | 0.100189542 | 0.202229171 | 0 | 0.009043642 | 0.040044025 | 0.000506743 | 0.304209044 | 0.140357626 | 0.240350837 | 0.064228547 | 0.068044331 | 0.046796689 | 0 | 0 | 0.000803439 |
| TCGA-FP-A4BF | 0.012425408 | 0 | 0.295640061 | 0.607049932 | 0 | 0.132460419 | 0.467431315 | 0.158579264 | 0.153152731 | 0.156581227 | 0 | 0.221846584 | 0 | 0.38121534 | 0.308263826 | 0.540027114 | 0.035727517 | 0.021163658 | 0.100681795 | 0 | 0.017124686 | 0.001803752 |
| TCGA-IN-A6RN | 0.058894604 | 0.009270021 | 0.054430121 | 0.051775832 | 0 | 0.373718927 | 0 | 0.024607155 | 0.117586803 | 0 | 0.031471171 | 0.038585983 | 0.005847412 | 0.11372948 | 0.067586147 | 0.155697719 | 0.017904319 | 0.010149845 | 0 | 0.128920716 | 0.002028704 | 0.001911902 |
| TCGA-CD-A4MH | 0.046036903 | 0 | 0.288832593 | 0.123469019 | 0 | 0.393055907 | 0.016301598 | 0.081063343 | 0.104904822 | 0 | 0 | 0.047959331 | 0.005961505 | 0.053536524 | 0.124431882 | 0.147488414 | 0.095084132 | 0.005062779 | 0.104122438 | 0 | 0 | 0.015636888 |
| TCGA-CG-4305 | 0.212008548 | 0 | 0.020750704 | 0.381663282 | 0 | 0.358713814 | 0.406112938 | 0.015172018 | 0.008028773 | 0.267381604 | 0 | 0 | 0.001209093 | 0.241063801 | 0.288799283 | 0.593314038 | 0.047218993 | 0 | 0.195644181 | 0 | 0 | 0.06895966 |
| TCGA-D7-A6EY | 0.380038662 | 0.059979489 | 0.120343604 | 0.401324312 | 0 | 0.436368191 | 0.178749501 | 0.223014073 | 0.326348581 | 0.023400929 | 0.003241513 | 0.057439928 | 0 | 0.43269647 | 0.337631093 | 0.302541859 | 0.071353002 | 0 | 0.137189513 | 0 | 0 | 0.077021559 |
| TCGA-IN-A6RO | 0.075162545 | 0 | 0.03832338 | 0.098599428 | 0 | 0.370959786 | 0.066628297 | 0.084366222 | 0.093192442 | 0 | 0.104033173 | 0 | 0.002544194 | 0.126214178 | 0.182510955 | 0.153812507 | 0.037614637 | 0.021352567 | 0.094731378 | 0 | 0 | 0 |
| TCGA-HU-8610 | 0.101842952 | 0 | 0.044280606 | 0.092373618 | 0 | 0.563756559 | 0.072263236 | 0.102774385 | 0.338239791 | 0 | 0.14646686 | 0 | 0 | 1.015145822 | 0.066396968 | 0.257767809 | 0 | 0.311875332 | 0 | 0.541660132 | 0 | 0.062916746 |
| TCGA-RD-A8N5 | 0.092522221 | 0 | 0.008607971 | 0 | 0 | 0.400765064 | 0 | 0 | 0.04197321 | 0 | 0.139024546 | 0 | 0.010806292 | 0.550599929 | 0.024294338 | 0.374829211 | 0 | 0.063162566 | 0 | 0.306727959 | 0.009142713 | 0.252984007 |
| TCGA-HU-A4G2 | 0.048244364 | 0 | 0.033953928 | 0.300074796 | 0 | 0.266859757 | 0.249859714 | 0.007140862 | 0.093822276 | 0.03640669 | 0.005993828 | 0.042337457 | 0 | 0.075527704 | 0.166379335 | 0.353235145 | 0.049402981 | 0.022642354 | 0 | 0.031552739 | 0.001449454 | 0.005548232 |
| TCGA-BR-7716 | 0.089959169 | 0 | 0.192390649 | 0.730442024 | 0 | 0.358365658 | 0.299256107 | 0.138611733 | 0.317343552 | 0 | 0.076350766 | 0.027217035 | 0.033148555 | 0.314026184 | 0.347100554 | 0.325702278 | 0.075366946 | 0 | 0.152719091 | 0 | 0 | 0.005098317 |
| TCGA-D7-6818 | 0.070407779 | 0.010710981 | 0.077152686 | 0.063187213 | 0 | 0.274174355 | 0.005470551 | 0 | 0.240557445 | 0 | 0.02169586 | 0.024060069 | 0.162171772 | 0.495206101 | 0.121126561 | 0.607528427 | 0.082887364 | 0 | 0.162861016 | 0 | 0 | 0.145399964 |
| TCGA-BR-8687 | 0.038960954 | 0 | 0.082535917 | 0.068752559 | 0 | 0.412517994 | 0.015759766 | 0.010143517 | 0.065627289 | 0 | 0.025643133 | 0.024825392 | 0.010578073 | 0.134252781 | 0.096099128 | 0.250024112 | 0.107202075 | 0 | 0.098041781 | 0 | 0 | 0 |
| TCGA-BR-8680 | 0.10287946 | 0.010547331 | 0.020126498 | 0.15893602 | 0 | 0.194404235 | 0.062024376 | 0.105889378 | 0.056120532 | 0 | 0.074398993 | 0 | 0 | 0.194465601 | 0.083808499 | 0.183746768 | 0.050179324 | 0 | 0.02825847 | 0.097779568 | 0.00113488 | 0 |
| TCGA-BR-8291 | 0.068810639 | 0 | 0.056323768 | 0.423757127 | 0 | 0.402544743 | 0.068941765 | 0 | 0.198187042 | 0 | 0 | 0.114646685 | 0.055652156 | 0.083172163 | 0.090309663 | 0.658915801 | 0.186565489 | 0.009237009 | 0.301800839 | 0 | 0.011796295 | 0.00275997 |
| TCGA-BR-8686 | 0.284976409 | 0 | 0.295390357 | 0.684409135 | 0 | 0.464924863 | 0.160832266 | 0.098083494 | 0.115112768 | 0.055914978 | 0 | 0 | 0.049434275 | 0.098801329 | 0.32619605 | 0.426143638 | 0.019219458 | 0 | 0.24052822 | 0 | 0 | 0 |
| TCGA-IP-7968 | 0.203743356 | 0 | 0.021672815 | 0.682970107 | 0 | 0.220195024 | 0.114671656 | 0.203090754 | 0.133914041 | 0 | 0.052573457 | 0.033987553 | 0.029208903 | 0.173907373 | 0.237144199 | 0.227436449 | 0.04976953 | 0.007245666 | 0.105727922 | 0 | 0 | 0.011015886 |
| TCGA-VQ-AA6D | 0.086345512 | 0 | 0.015335984 | 0.06235968 | 0 | 0.496432298 | 0 | 0.108328762 | 0.118686348 | 0 | 0.065691342 | 0 | 0.003289314 | 0.529719564 | 0.129428136 | 0.109445673 | 0 | 0.062740185 | 0 | 0.170960941 | 0 | 0.001802545 |
| TCGA-VQ-A92D | 0.085161123 | 0 | 0.017373716 | 0.09906288 | 0 | 0.340096606 | 0.056199637 | 0.09329929 | 0.145321342 | 0 | 0.088890756 | 0 | 0 | 0.267705726 | 0.128640987 | 0.191800662 | 0.006223343 | 0 | 0 | 0.103265235 | 0 | 0.00430411 |
| TCGA-CG-4436 | 0.132801445 | 0 | 0.020529898 | 0.001987439 | 0 | 0.567896352 | 0.225566303 | 0 | 0 | 0 | 0.046431361 | 0.014049774 | 0 | 0.251851145 | 0.141114198 | 0.229757082 | 0.023159129 | 0 | 0 | 0.379420241 | 0.033036176 | 0.231300176 |
| TCGA-VQ-A8DT | 0.026176323 | 0.014462473 | 0.06285426 | 0.156574582 | 0 | 0.332127375 | 0.101799401 | 0.016205881 | 0.104698433 | 0 | 0.002645563 | 0.036245588 | 0.011844554 | 0.110298507 | 0.049357598 | 0.114154771 | 0.016824075 | 0.034702277 | 0.109295869 | 0.021778744 | 0 | 0.020289316 |
| TCGA-BR-A4J6 | 0.062451176 | 0 | 0.338135303 | 0.125909285 | 0 | 0.295898902 | 0 | 0.054731444 | 0.097859799 | 0 | 0.036135965 | 0.005717609 | 0.019841878 | 0.021713019 | 0.029077154 | 0.111671498 | 0.018767039 | 0.003862693 | 0.032932663 | 0.006660679 | 0 | 0 |
