# Supplementary material for: The Comprehensive Analysis of Competitive Endogenous RNA Networks and Tumor-Infiltrating Immune Cells in Gastric Cancer With Lymph Node Metastasis
Source: Research Square preprint supplement (doi:10.21203/rs.3.rs-1133390/v1), 2021-12-08
Supplement: Supplementary file 5 [file 778e060ea805603e95db629d.docx]

| LncRNA | miRNA |
| --- | --- |
| RP11-849I19.1 | hsa-miR-103a-2-5p |
| LINC01105 | hsa-miR-103a-3p |
| RP6-24A23.7 | hsa-miR-103a-3p |
| LINC01105 | hsa-miR-107 |
| RP6-24A23.7 | hsa-miR-107 |
| RP6-24A23.7 | hsa-miR-10a-5p |
| RP6-24A23.7 | hsa-miR-10b-5p |
| AC079466.1 | hsa-miR-125b-5p |
| RP11-538D16.3 | hsa-miR-125b-5p |
| RP11-728E14.3 | hsa-miR-1287-5p |
| RP11-401P9.4 | hsa-miR-129-5p |
| PCAT18 | hsa-miR-129-5p |
| RP11-89K21.1 | hsa-miR-1301-3p |
| AC079466.1 | hsa-miR-150-5p |
| RP6-24A23.7 | hsa-miR-150-5p |
| RP11-218I7.2 | hsa-miR-15a-5p |
| RP6-24A23.7 | hsa-miR-15a-5p |
| RP6-24A23.7 | hsa-miR-15b-5p |
| RP11-218I7.2 | hsa-miR-15b-5p |
| RP11-115D19.1 | hsa-miR-181b-3p |
| RP11-728E14.3 | hsa-miR-185-5p |
| LINC01105 | hsa-miR-185-5p |
| RP6-24A23.7 | hsa-miR-195-5p |
| RP11-218I7.2 | hsa-miR-195-5p |
| AC007131.2 | hsa-miR-21-3p |
| RP11-115D19.2 | hsa-miR-21-3p |
| RP11-728E14.3 | hsa-miR-21-3p |
| AC079466.1 | hsa-miR-219a-1-3p |
| AC007131.2 | hsa-miR-22-3p |
| RP11-728E14.3 | hsa-miR-3065-3p |
| RP11-333A23.4 | hsa-miR-30b-3p |
| AC079466.1 | hsa-miR-30b-3p |
| LINC00458 | hsa-miR-335-3p |
| RP11-333A23.4 | hsa-miR-335-3p |
| RP11-728E14.3 | hsa-miR-335-3p |
| RP13-895J2.6 | hsa-miR-335-3p |
| AC079466.1 | hsa-miR-335-3p |
| CTD-2354A18.1 | hsa-miR-335-3p |
| AC079466.1 | hsa-miR-3614-5p |
| RP11-728E14.3 | hsa-miR-3614-5p |
| RP6-24A23.7 | hsa-miR-374a-5p |
| AC079466.1 | hsa-miR-378a-3p |
| AC079466.1 | hsa-miR-378c |
| AC079466.1 | hsa-miR-378d |
| AC079612.1 | hsa-miR-410-3p |
| AC079466.1 | hsa-miR-4326 |
| RP11-76I14.1 | hsa-miR-450b-5p |
| RP11-115J16.1 | hsa-miR-455-3p |
| AC079466.1 | hsa-miR-455-3p |
| RP11-728E14.3 | hsa-miR-483-3p |
| RP11-728E14.3 | hsa-miR-505-3p |
| RP11-76I14.1 | hsa-miR-532-3p |
| RP11-728E14.3 | hsa-miR-539-5p |
| RP11-728E14.3 | hsa-miR-542-3p |
| AC007131.2 | hsa-miR-542-3p |
| RP11-115D19.1 | hsa-miR-561-5p |
| RP11-115D19.1 | hsa-miR-590-3p |
| RP11-728E14.3 | hsa-miR-625-5p |
| RP11-115J16.1 | hsa-miR-629-3p |
| AC079466.1 | hsa-miR-642a-5p |
| AC079466.1 | hsa-miR-7-5p |
| RP11-783L4.1 | hsa-miR-7-5p |
| RP11-728E14.3 | hsa-miR-7-5p |
| ELOVL2-AS1 | hsa-miR-744-5p |
| AC079466.1 | hsa-miR-9-5p |
